# Supplementary material for: A Two-Step Synthesis of Unprotected 3-Aminoindoles via Post Functionalization with Nitrostyrene
Source: MDPI journal article supplement (doi:10.3390/molecules28093657), 2023-04-23

Electronic Supplementary Material (ESI)

## A two-step synthesis of unprotected 3-aminoindoles via post functionalization with nitrostyrene

Nicolai A. Aksenov, Nikolai A. Arutiunov, Igor A. Kurenkov, Vladimir V. Malyuga, Dmitrii A. Aksenov, Daria S. Momotova, Anna M. Zatsepilina, Elizaveta A. Chukanova, Alexander V. Leontiev, and Alexander V. Aksenov

*Department of Chemistry, North Caucasus Federal University, 1a Pushkin St., Stavropol 355009, Russian Federation*

### Supporting Information

|                                                                                                                                                                |     |
|----------------------------------------------------------------------------------------------------------------------------------------------------------------|-----|
| NMR Spectral Charts.....                                                                                                                                       | S2  |
| <sup>1</sup> H and <sup>13</sup> C NMR spectral charts for indolinones <b>4ab</b> , <b>4ad</b> .....                                                           | S2  |
| <sup>1</sup> H and <sup>13</sup> C NMR spectral charts for 3-aminoindole <b>5aa-ai</b> , <b>19</b> , <i>N</i> -Ac <b>5aa</b> and <i>N</i> -Ac <b>5ai</b> ..... | S7  |
| <sup>1</sup> H and <sup>13</sup> C NMR spectral charts for 1-methyl-2-phenyl-1 <i>H</i> -indole <b>J</b> .....                                                 | S34 |
| HRMS spectral chart for <b>4ab</b> , <b>4ad</b> , <b>5aa-ai</b> , <b>19</b> , <i>N</i> -Ac <b>5aa</b> and <i>N</i> -Ac <b>5ai</b> .....                        | S36 |

$^1\text{H}$  and  $^{13}\text{C}$  NMR spectral charts for 2-(5-halide-3-oxo-2-phenylindolin-2-yl)-2-phenylacetonitrile **4ab**, **4ad**

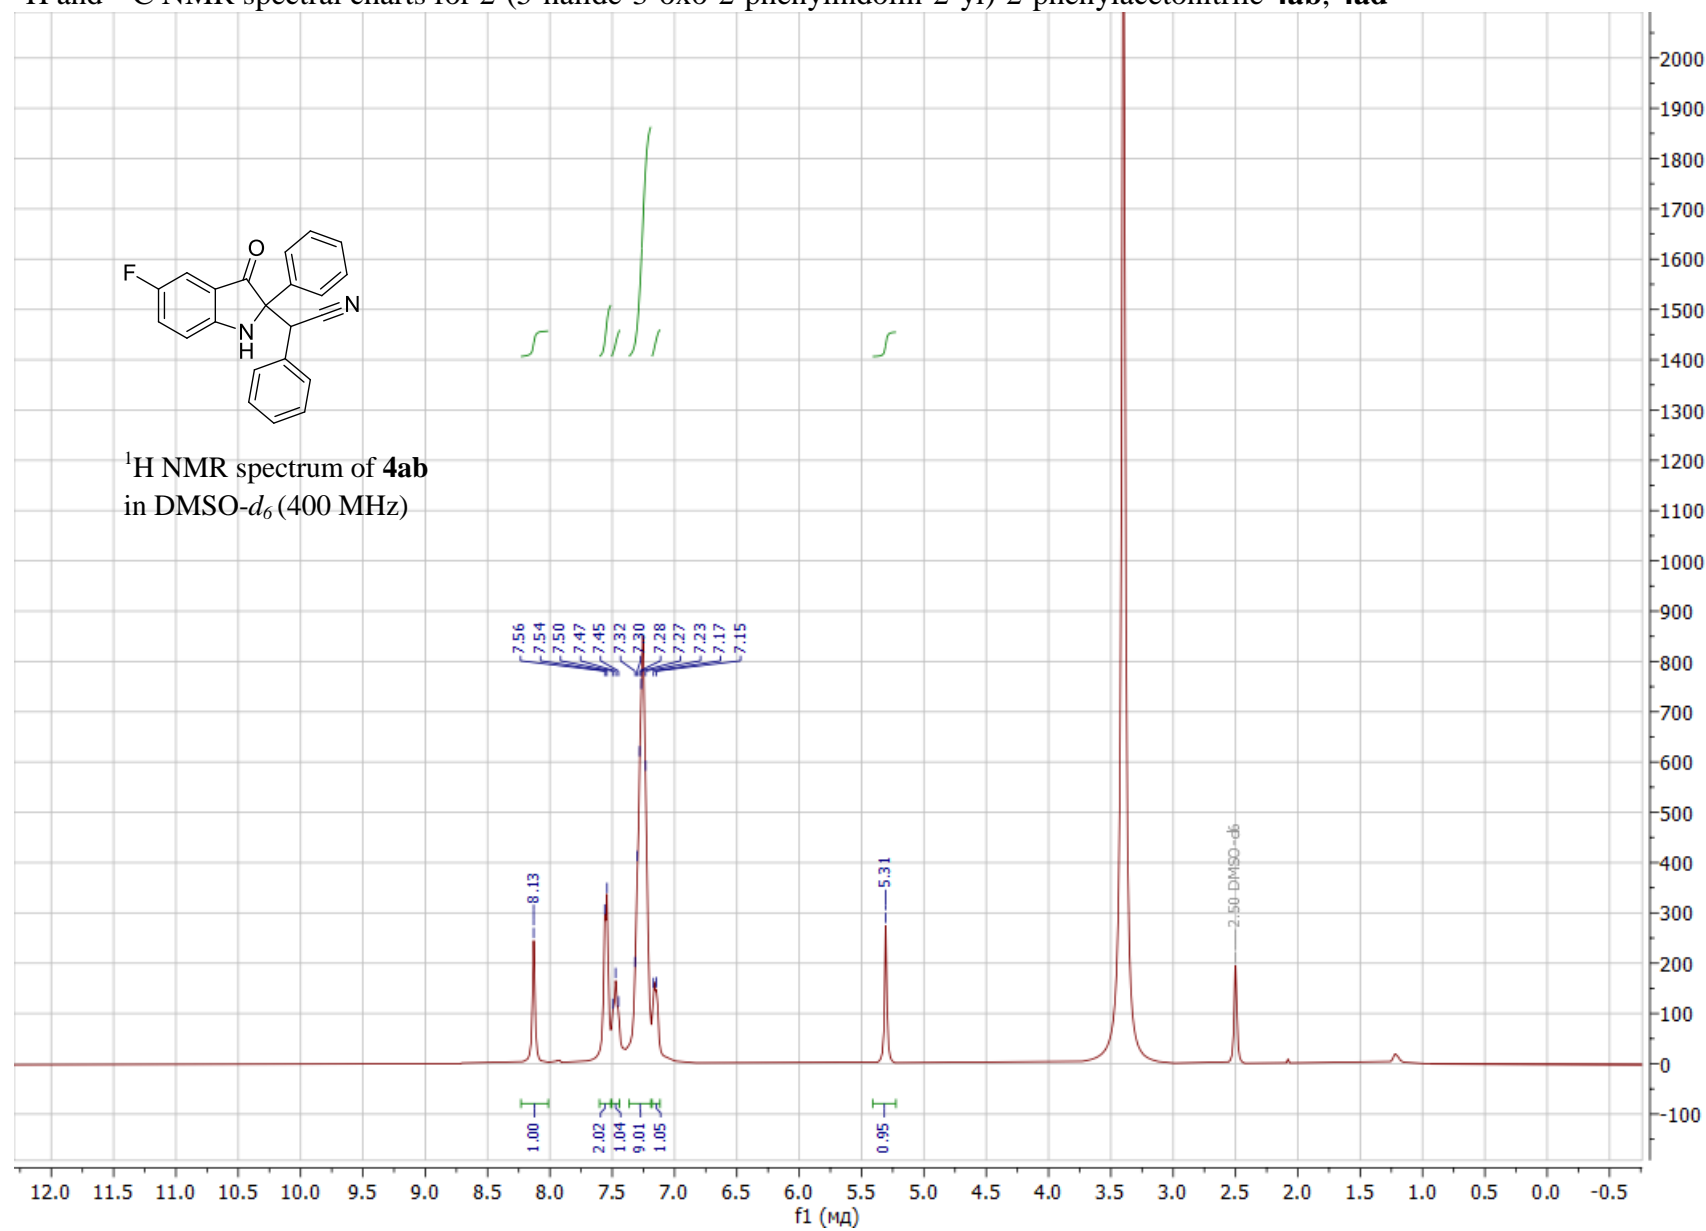

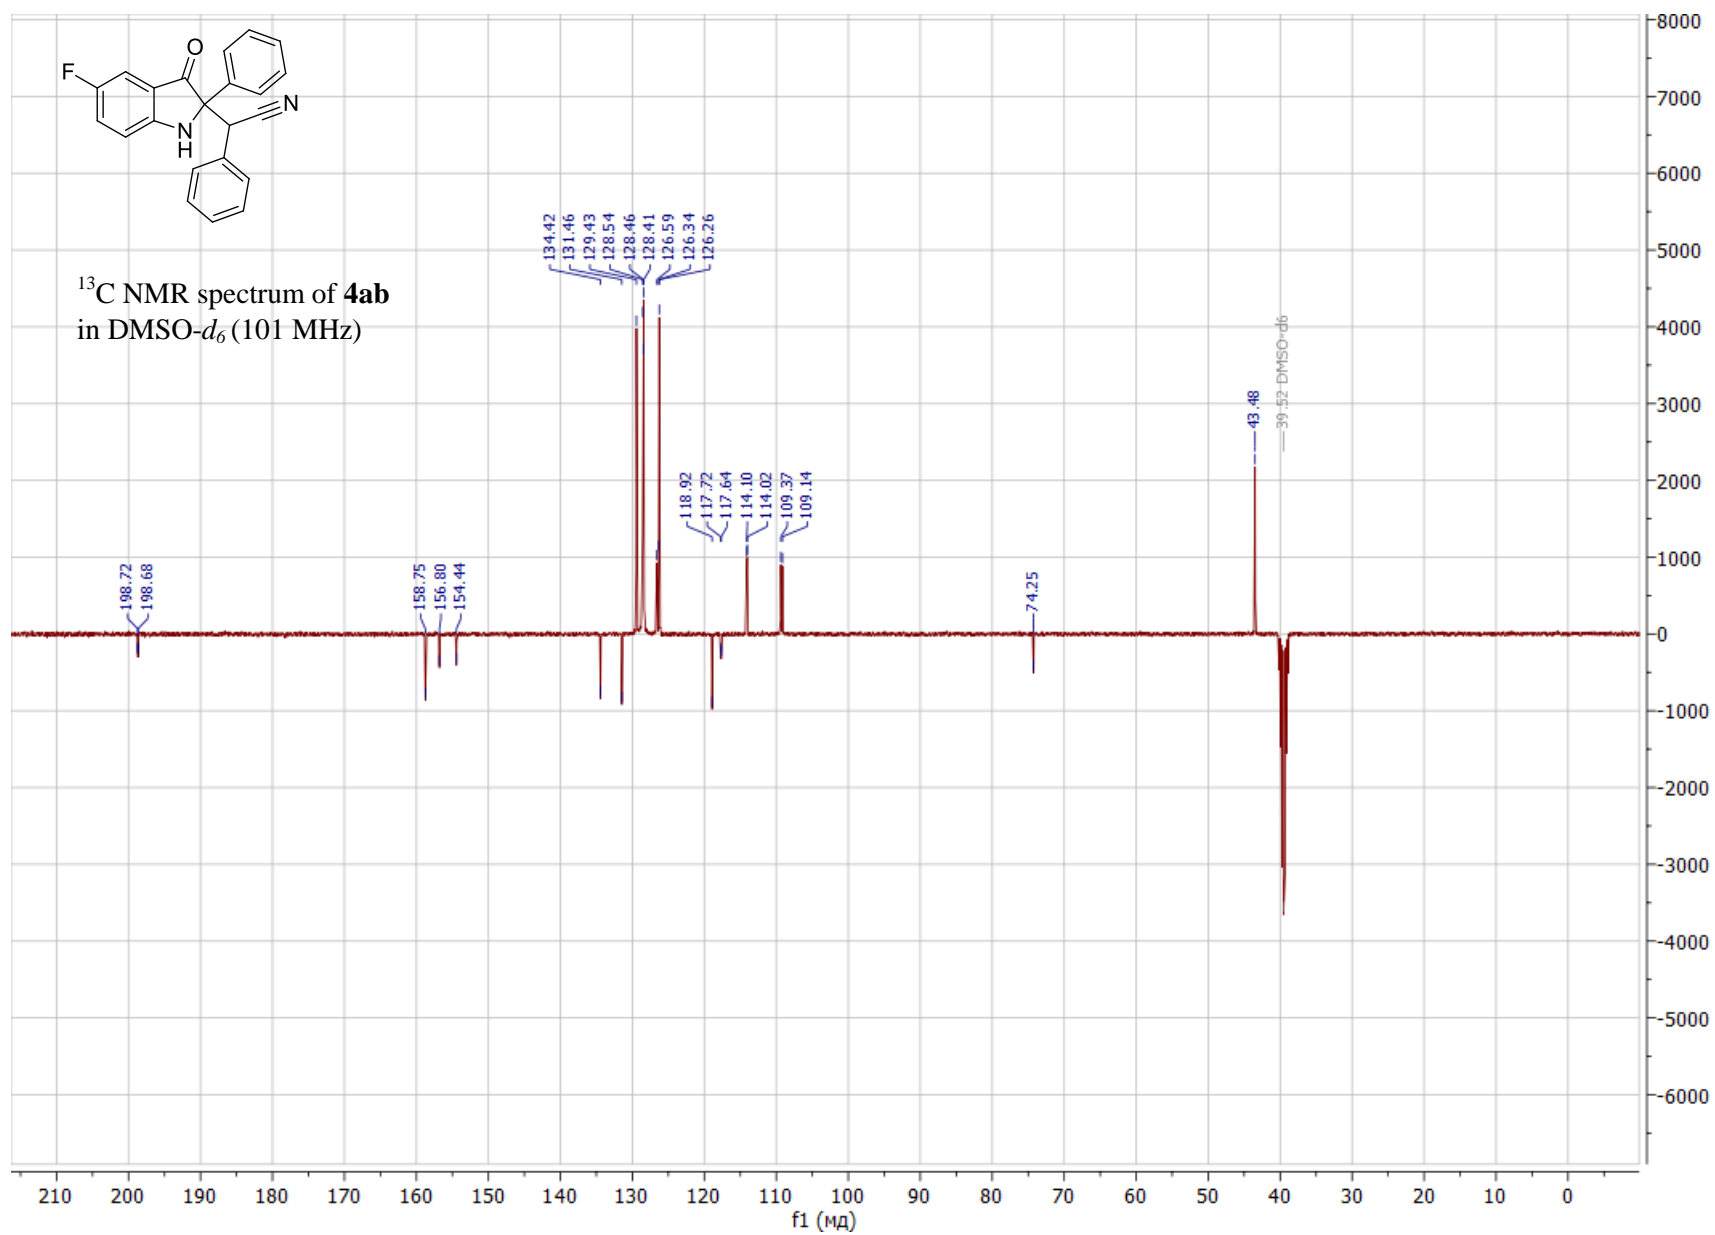

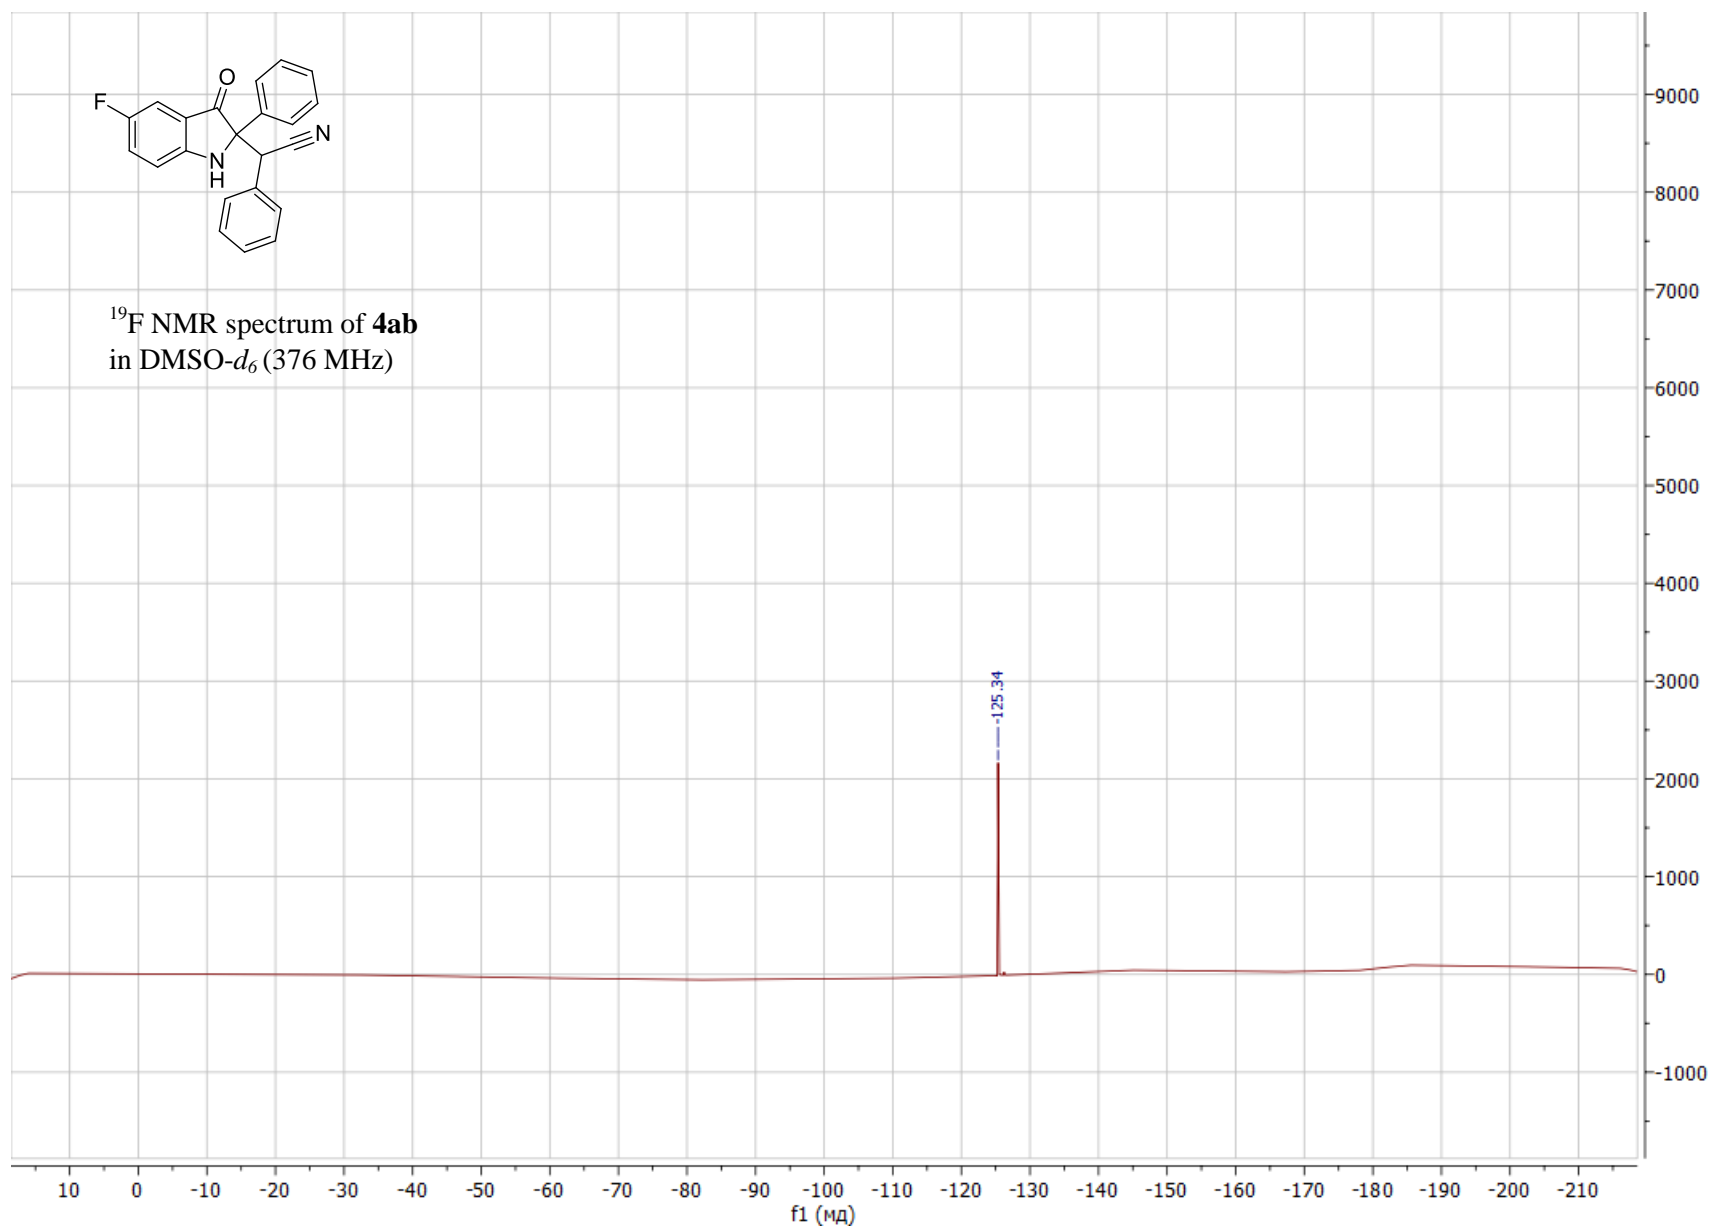

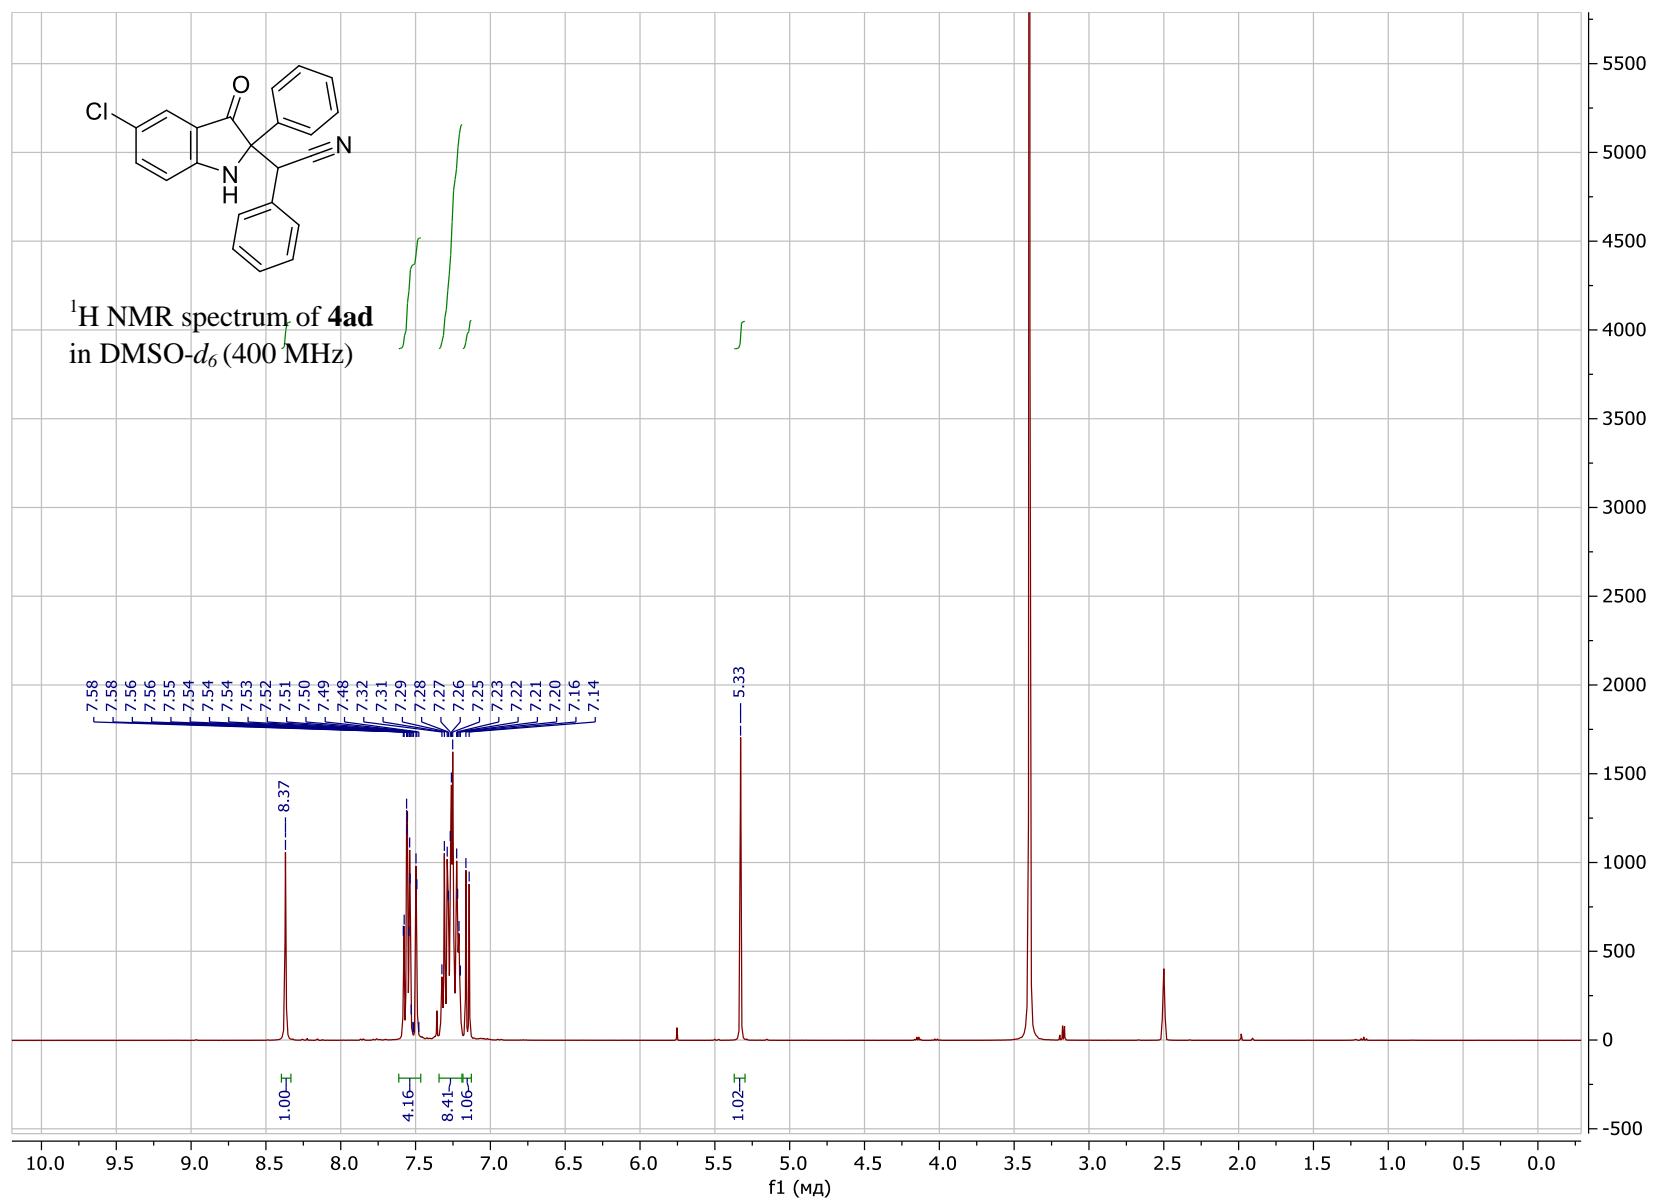

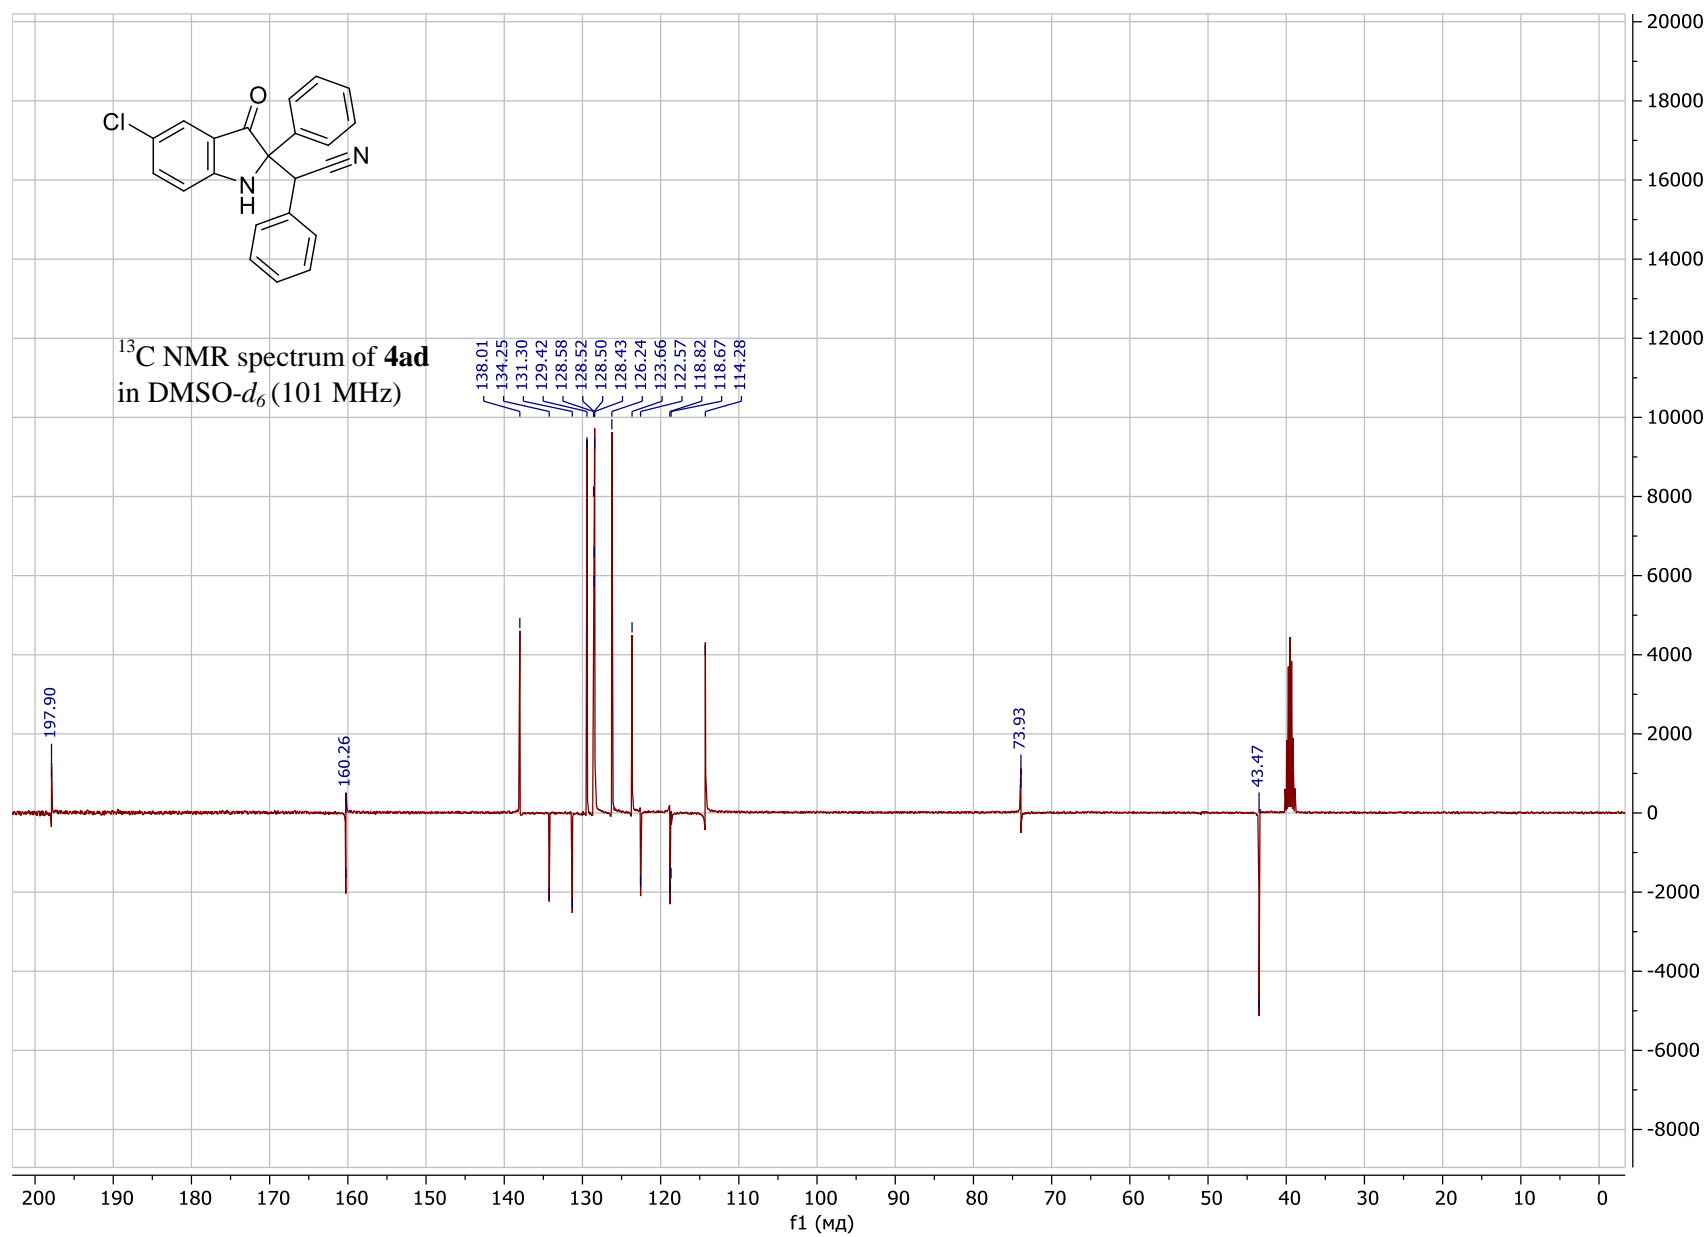

$^1\text{H}$  and  $^{13}\text{C}$  NMR spectral charts for 2-aryl-1H-indol-3-amines **5aa-5ai**, **19**, *N*-Ac **5aa** and *N*-Ac **5ai**

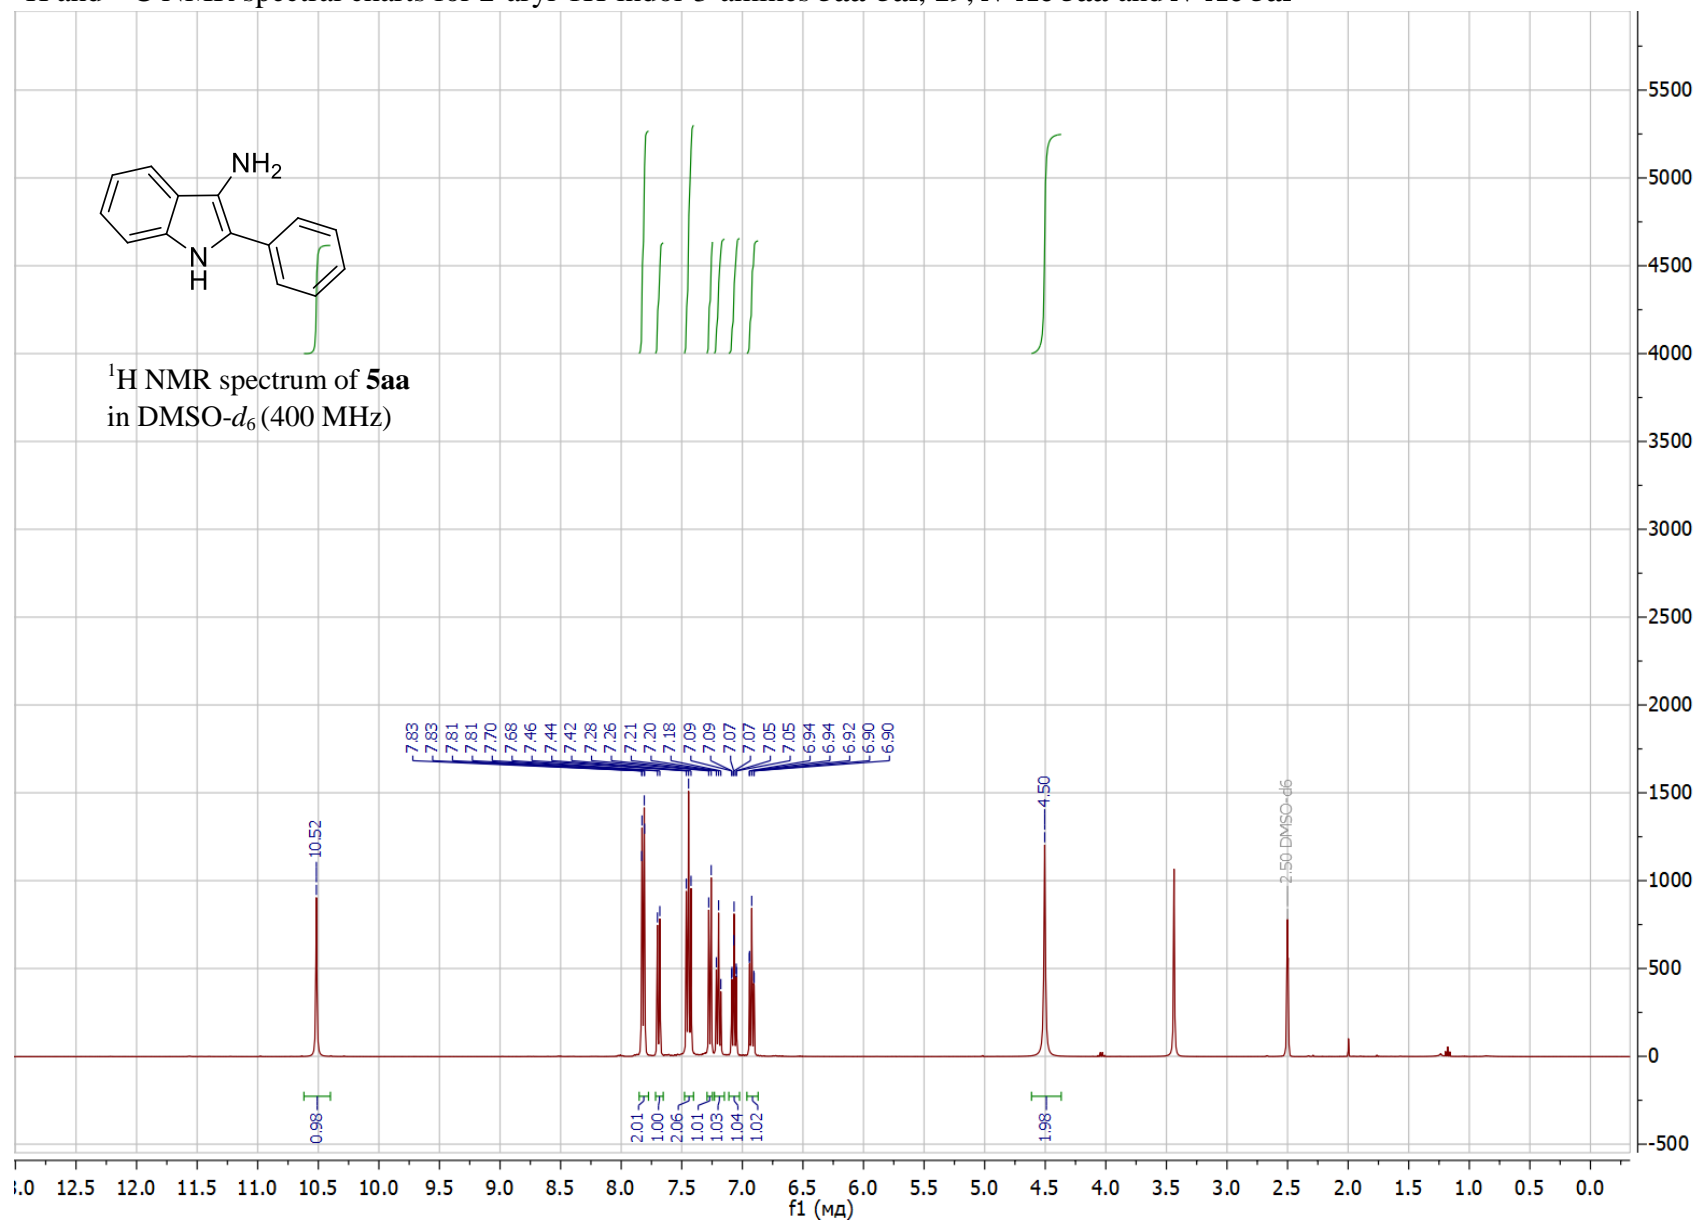

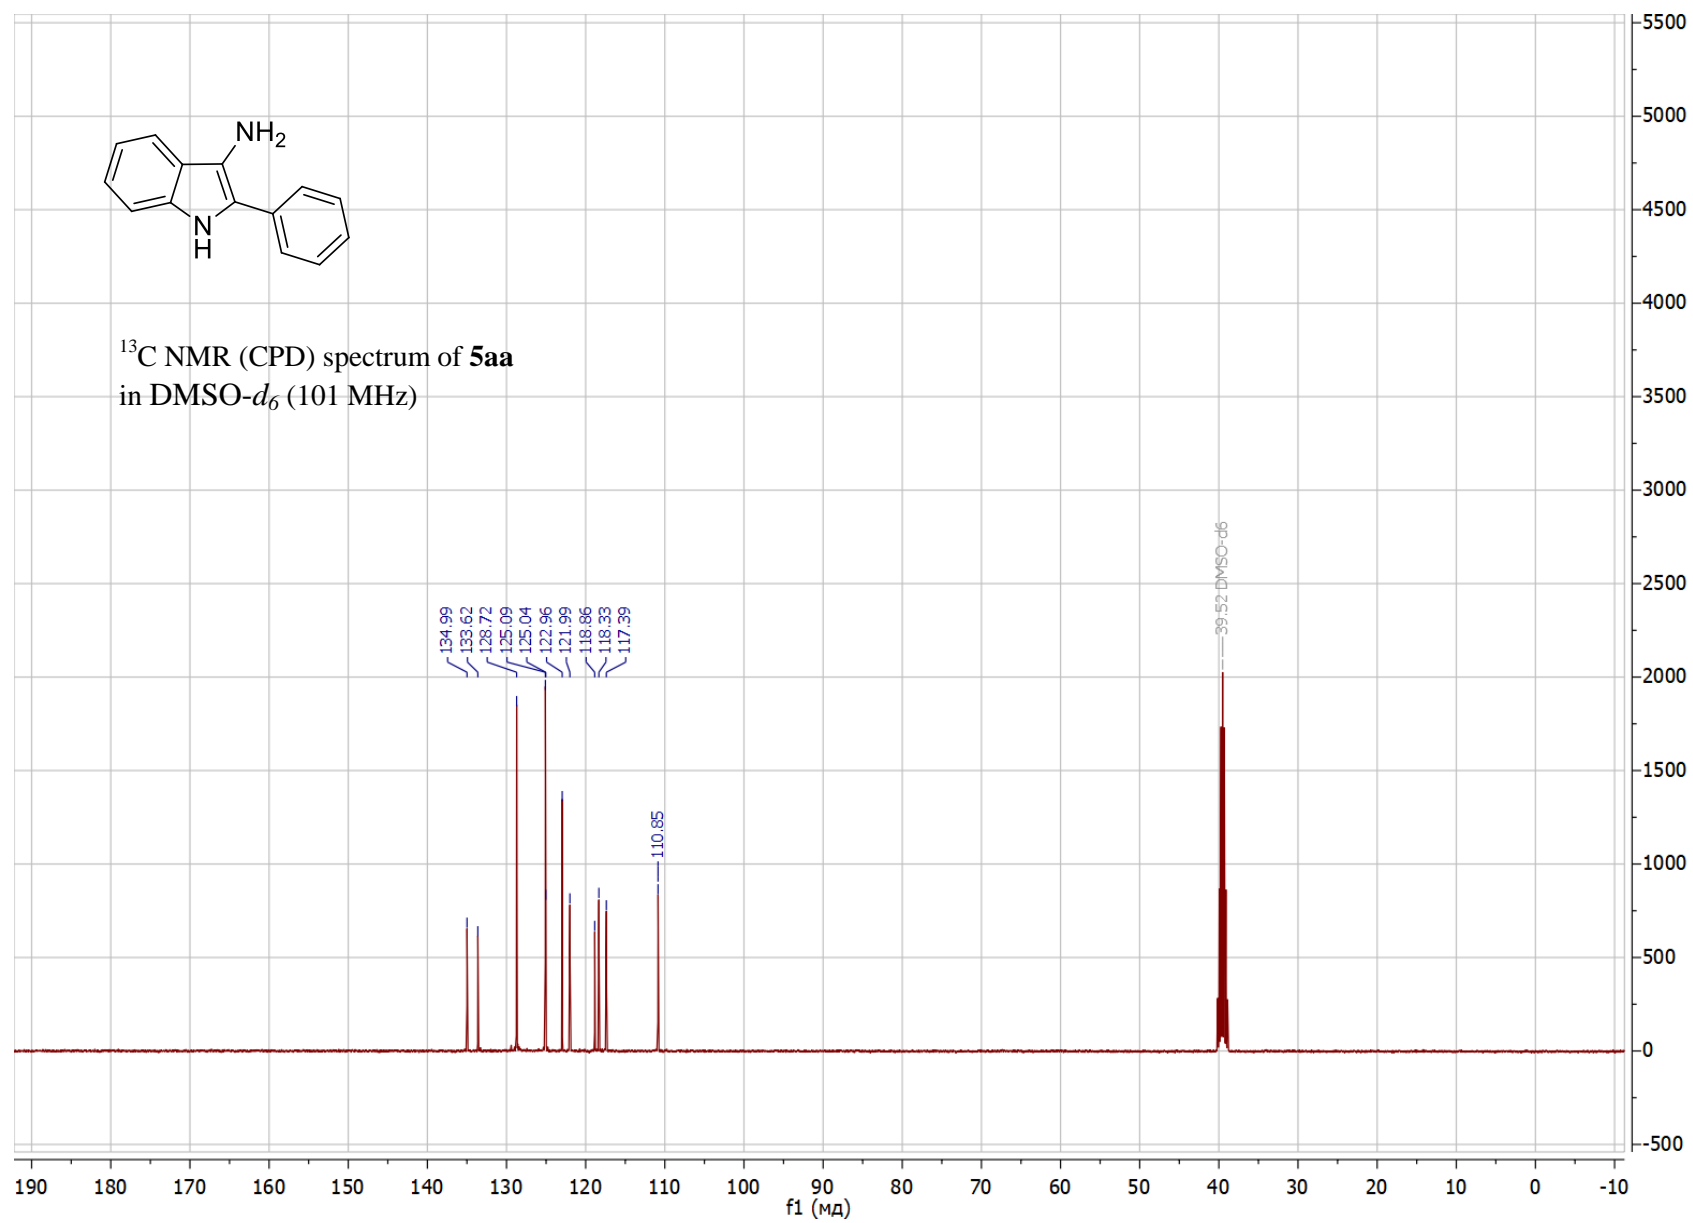



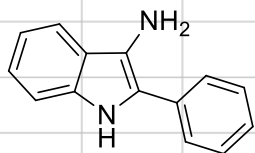

$^{13}\text{C}$  NMR (DEPT135) spectrum of **5aa**  
in  $\text{DMSO-}d_6$  (101 MHz)

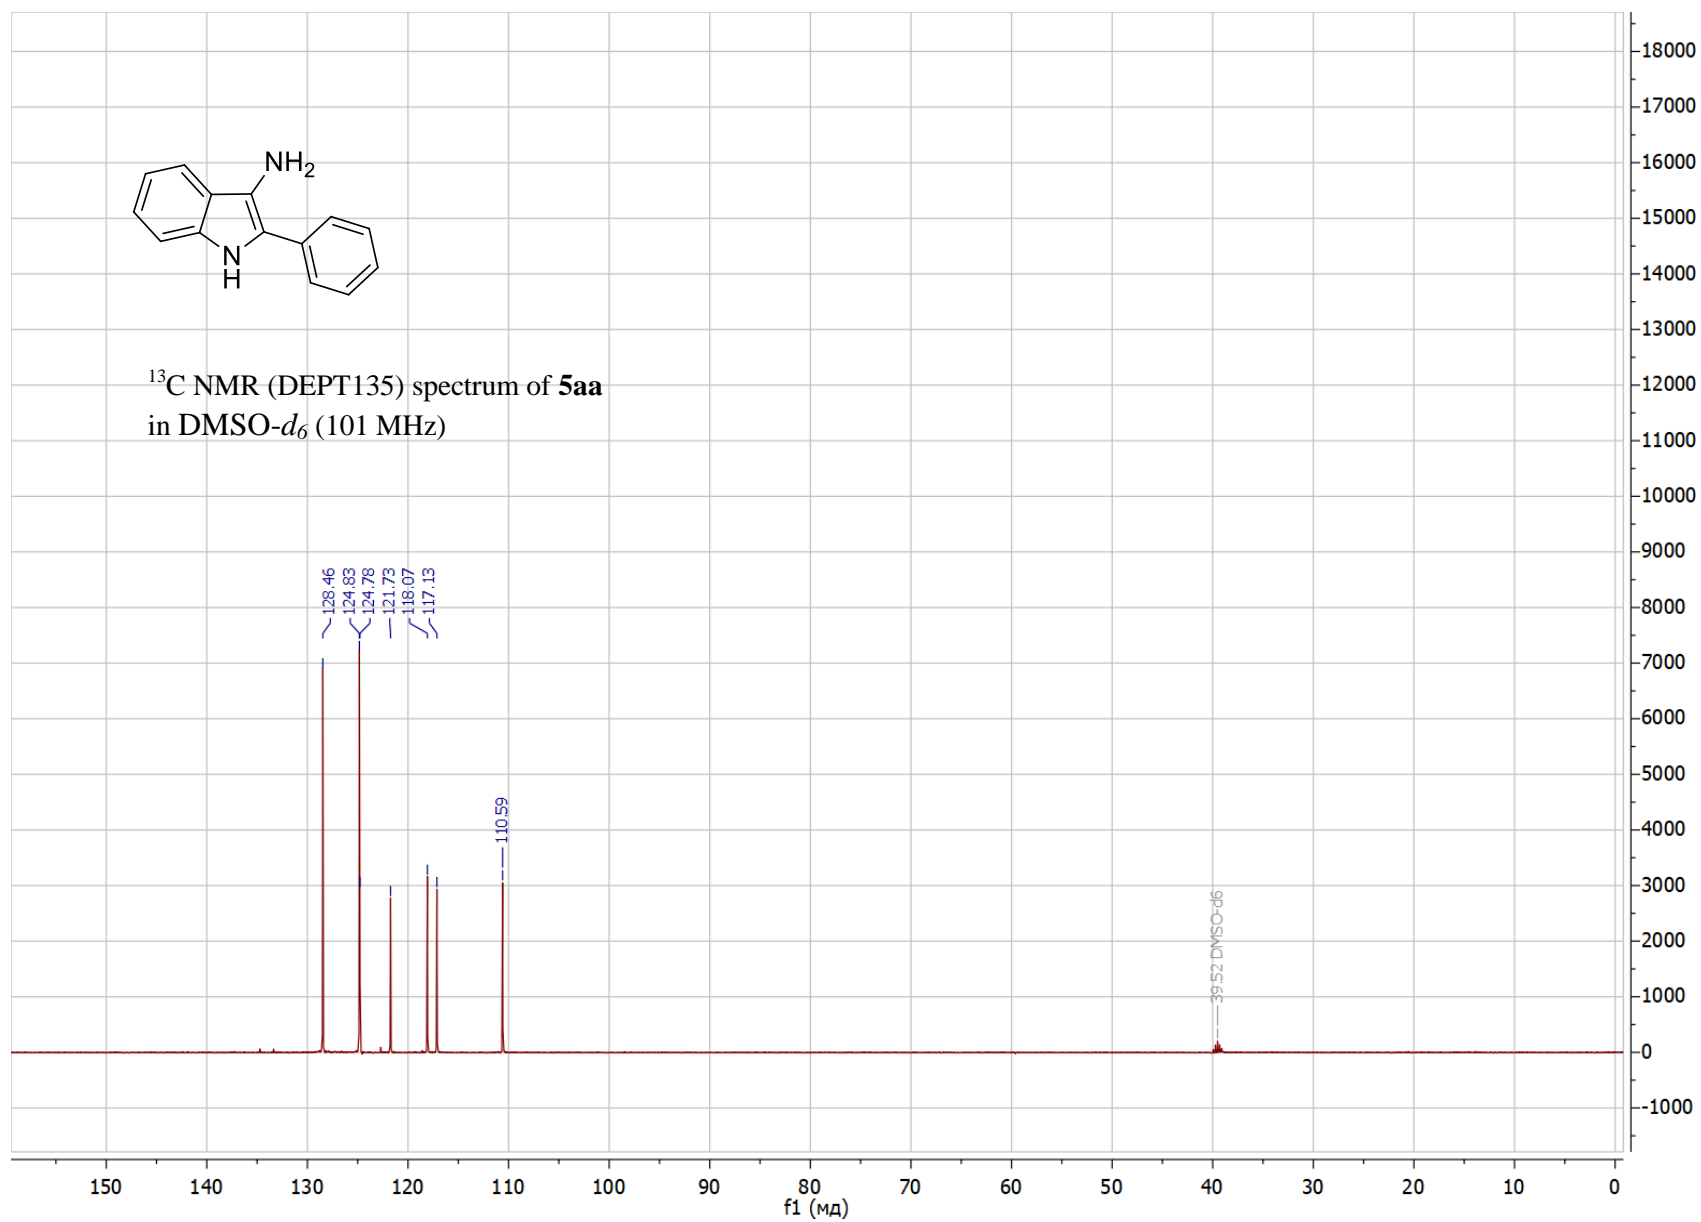

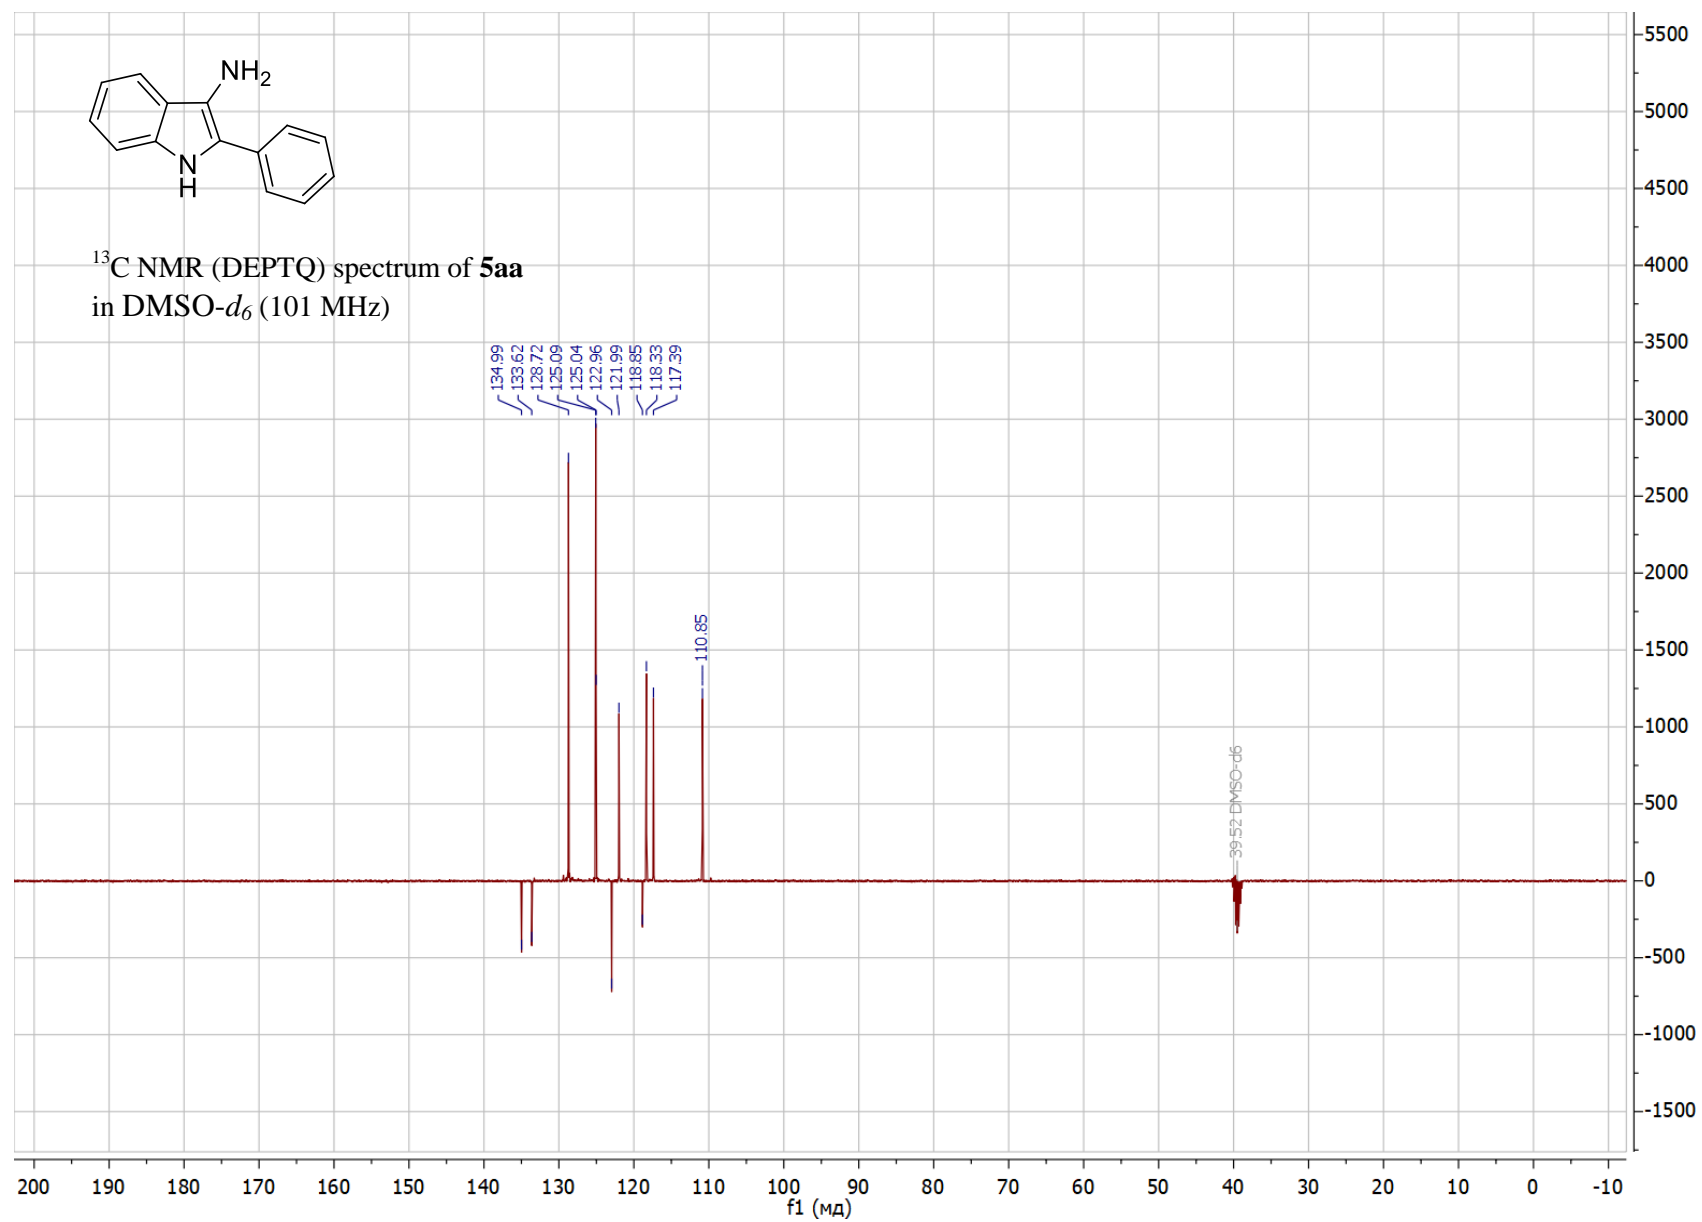

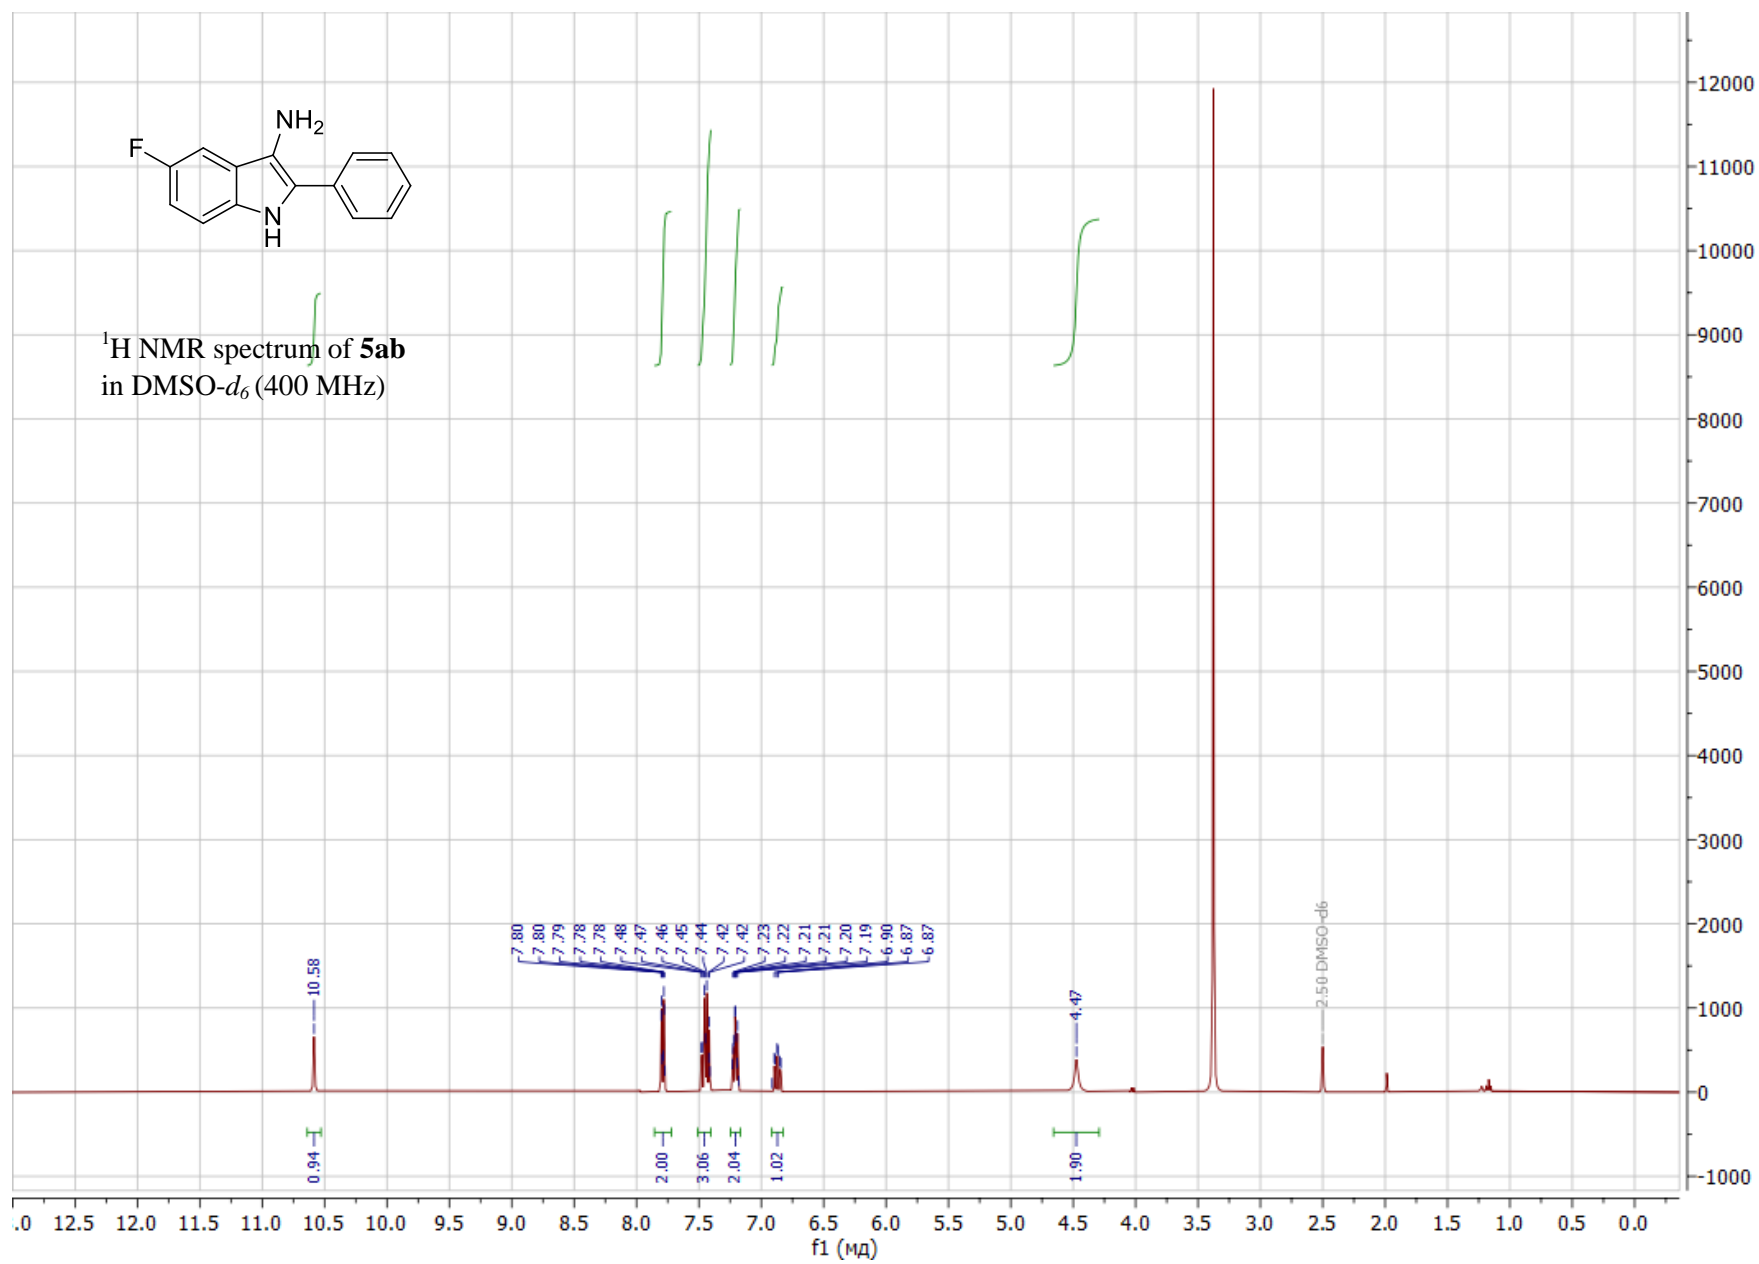

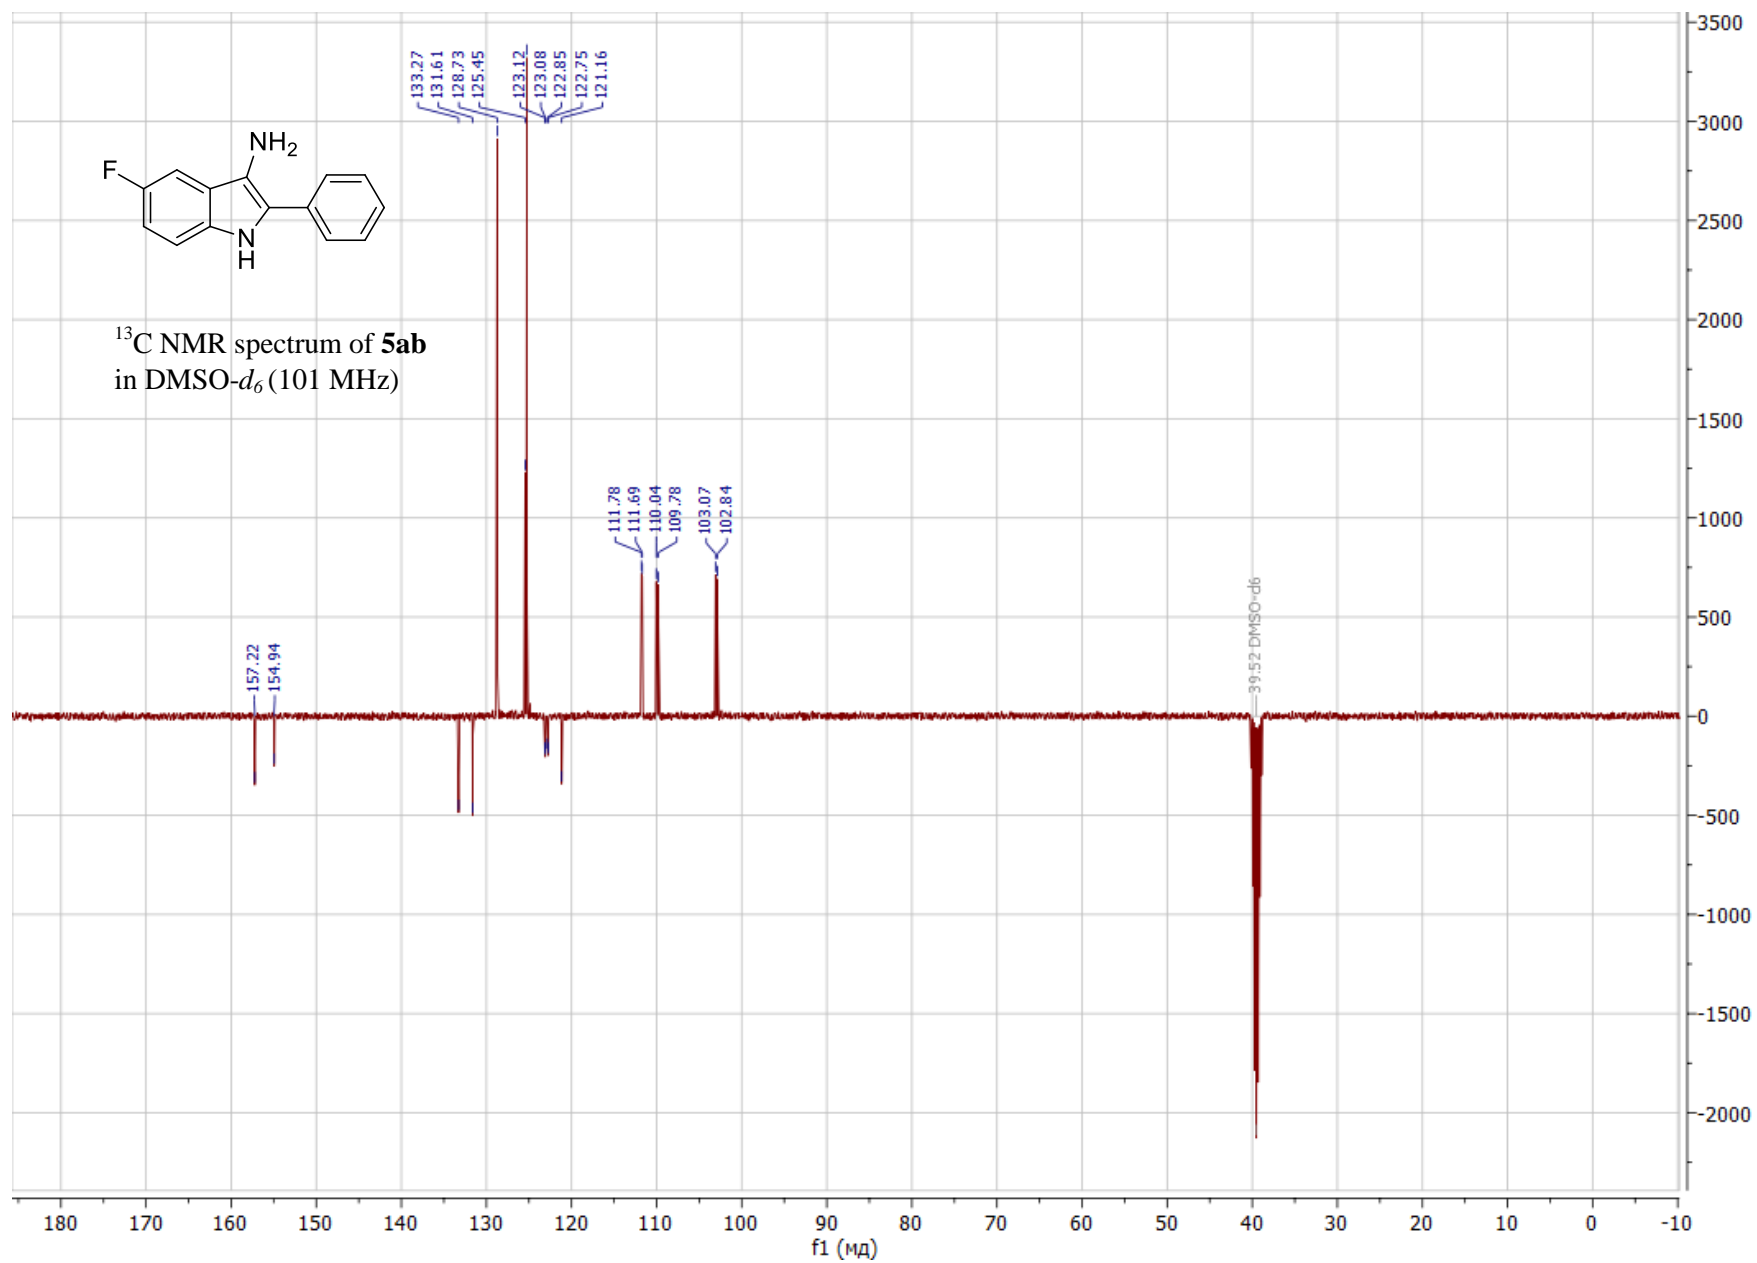

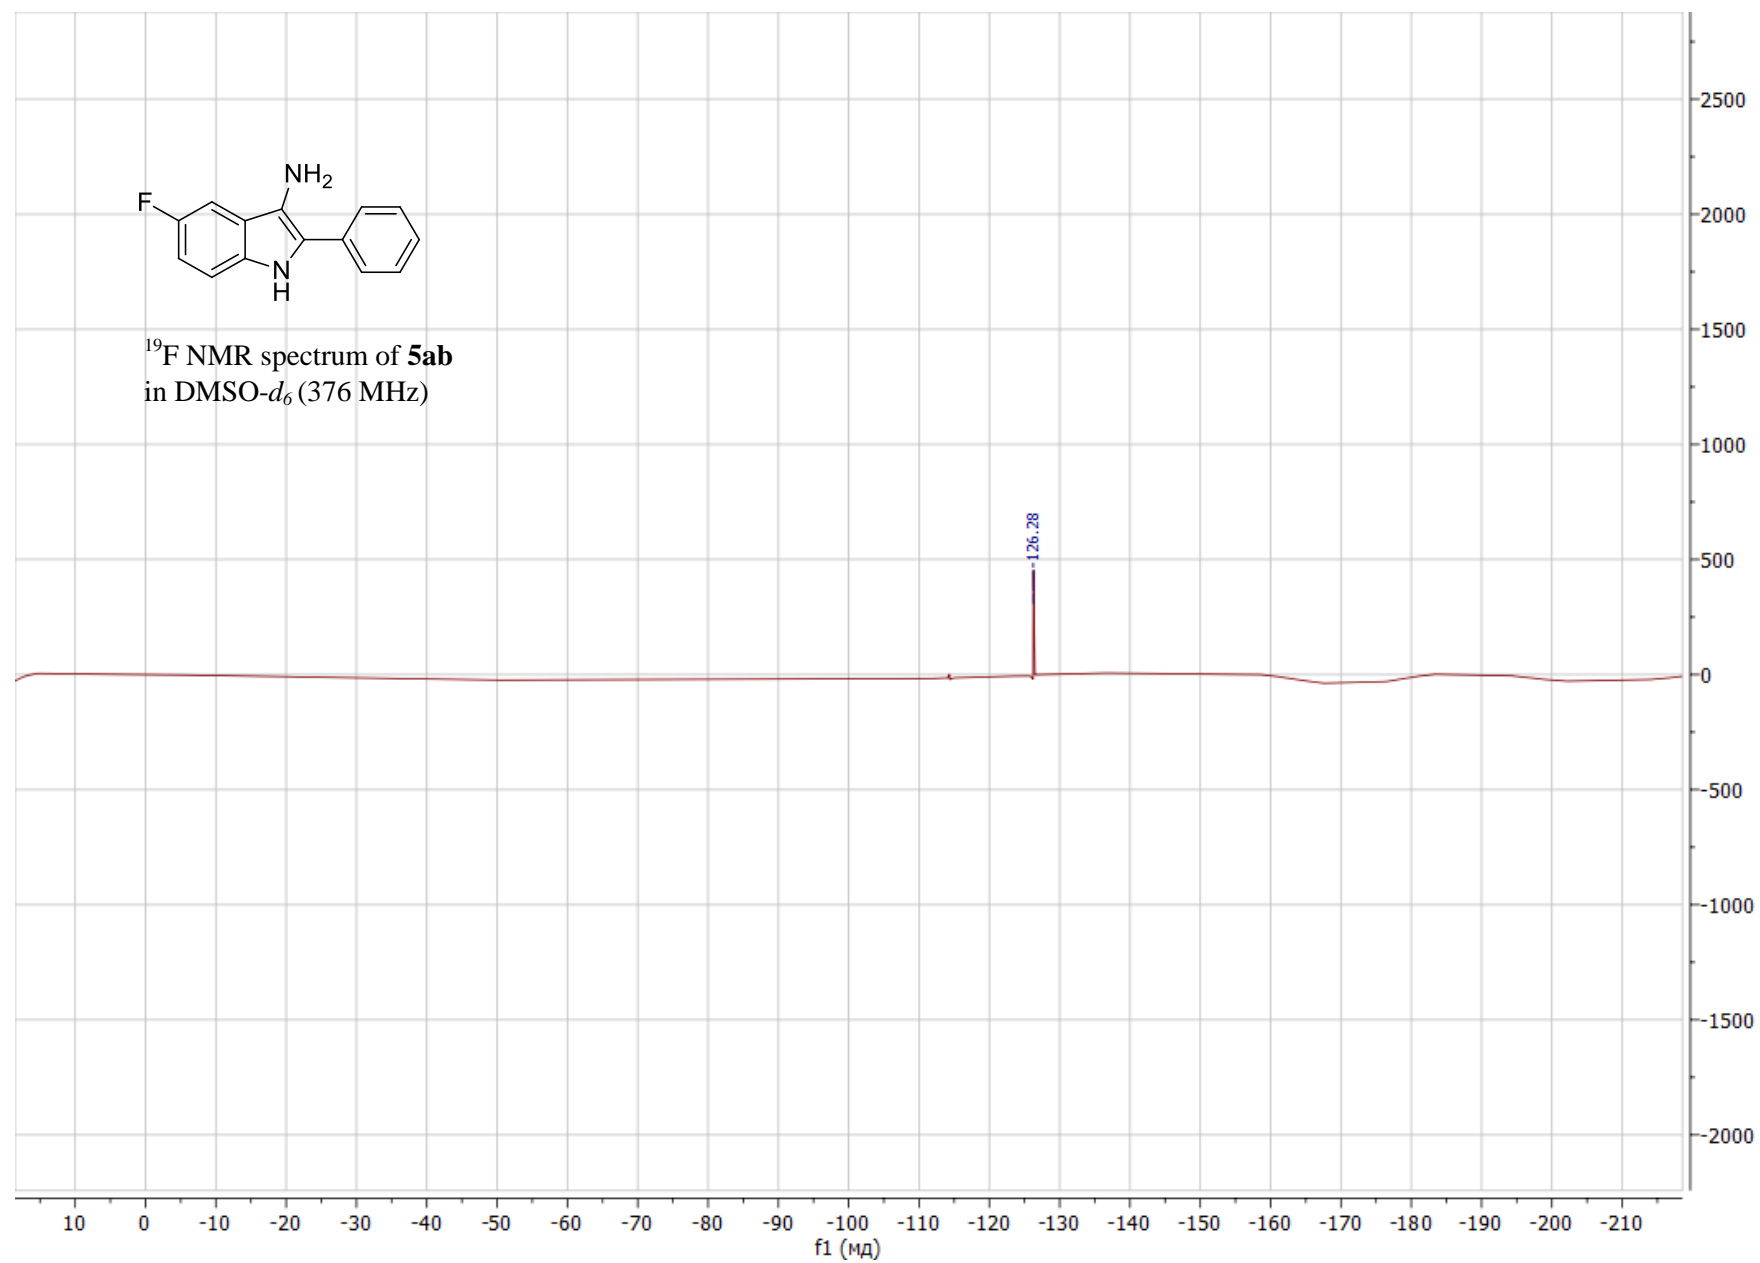

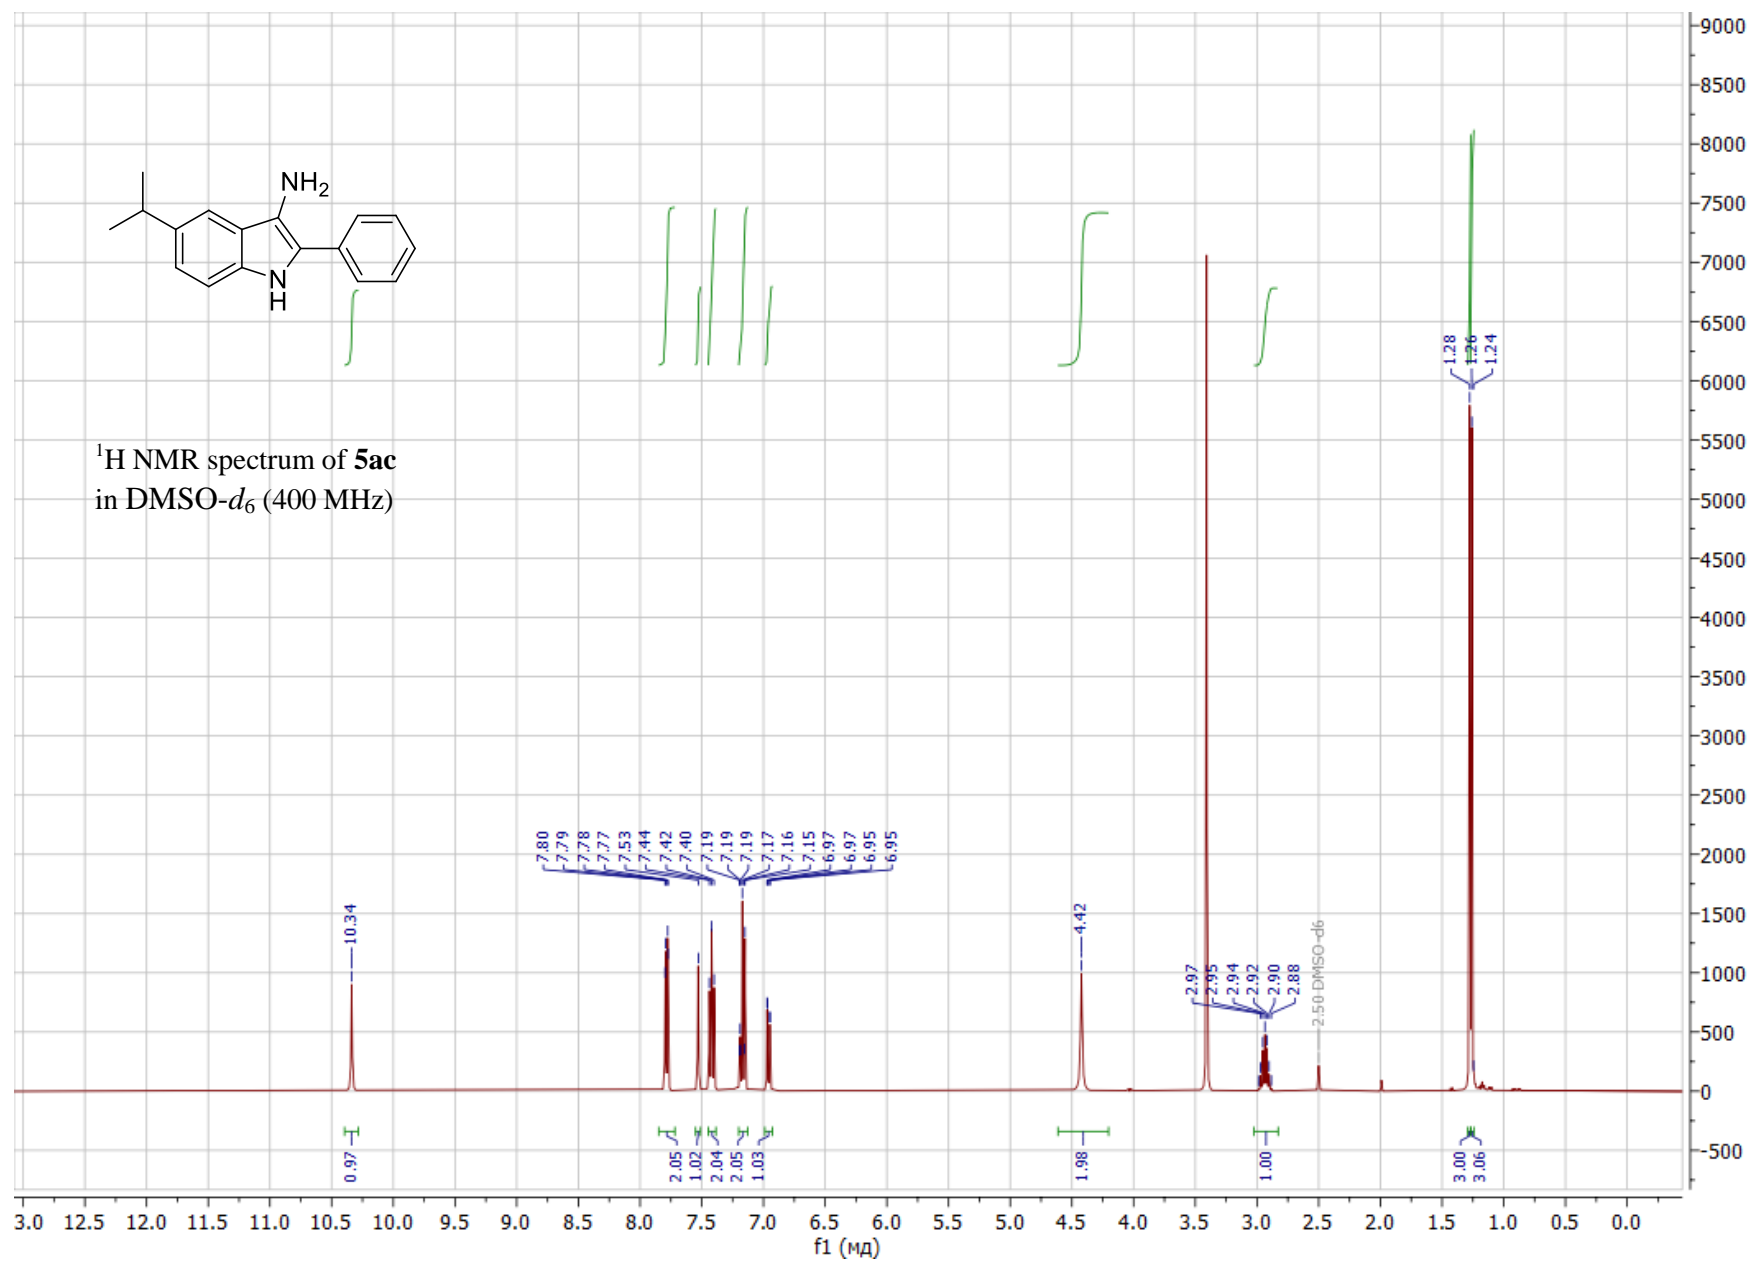

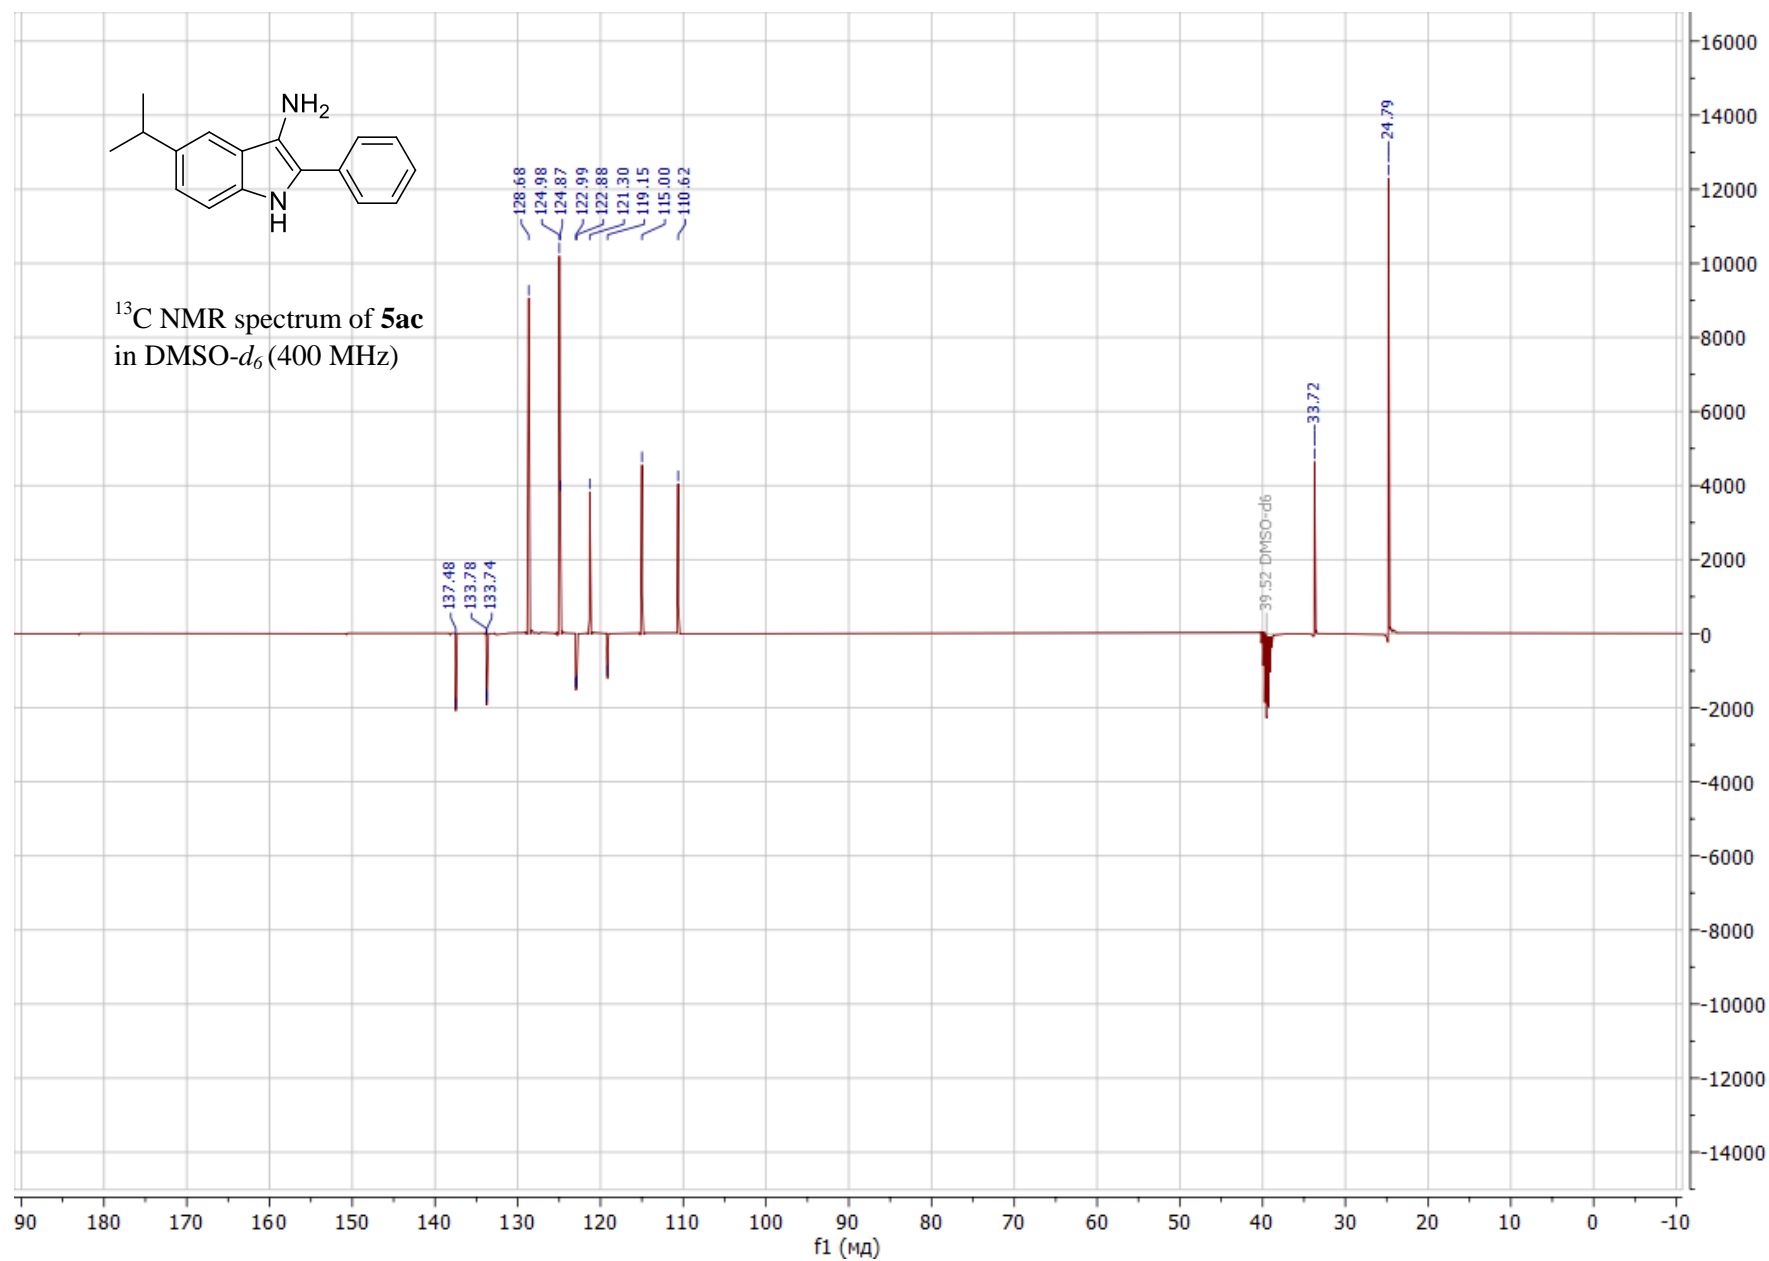

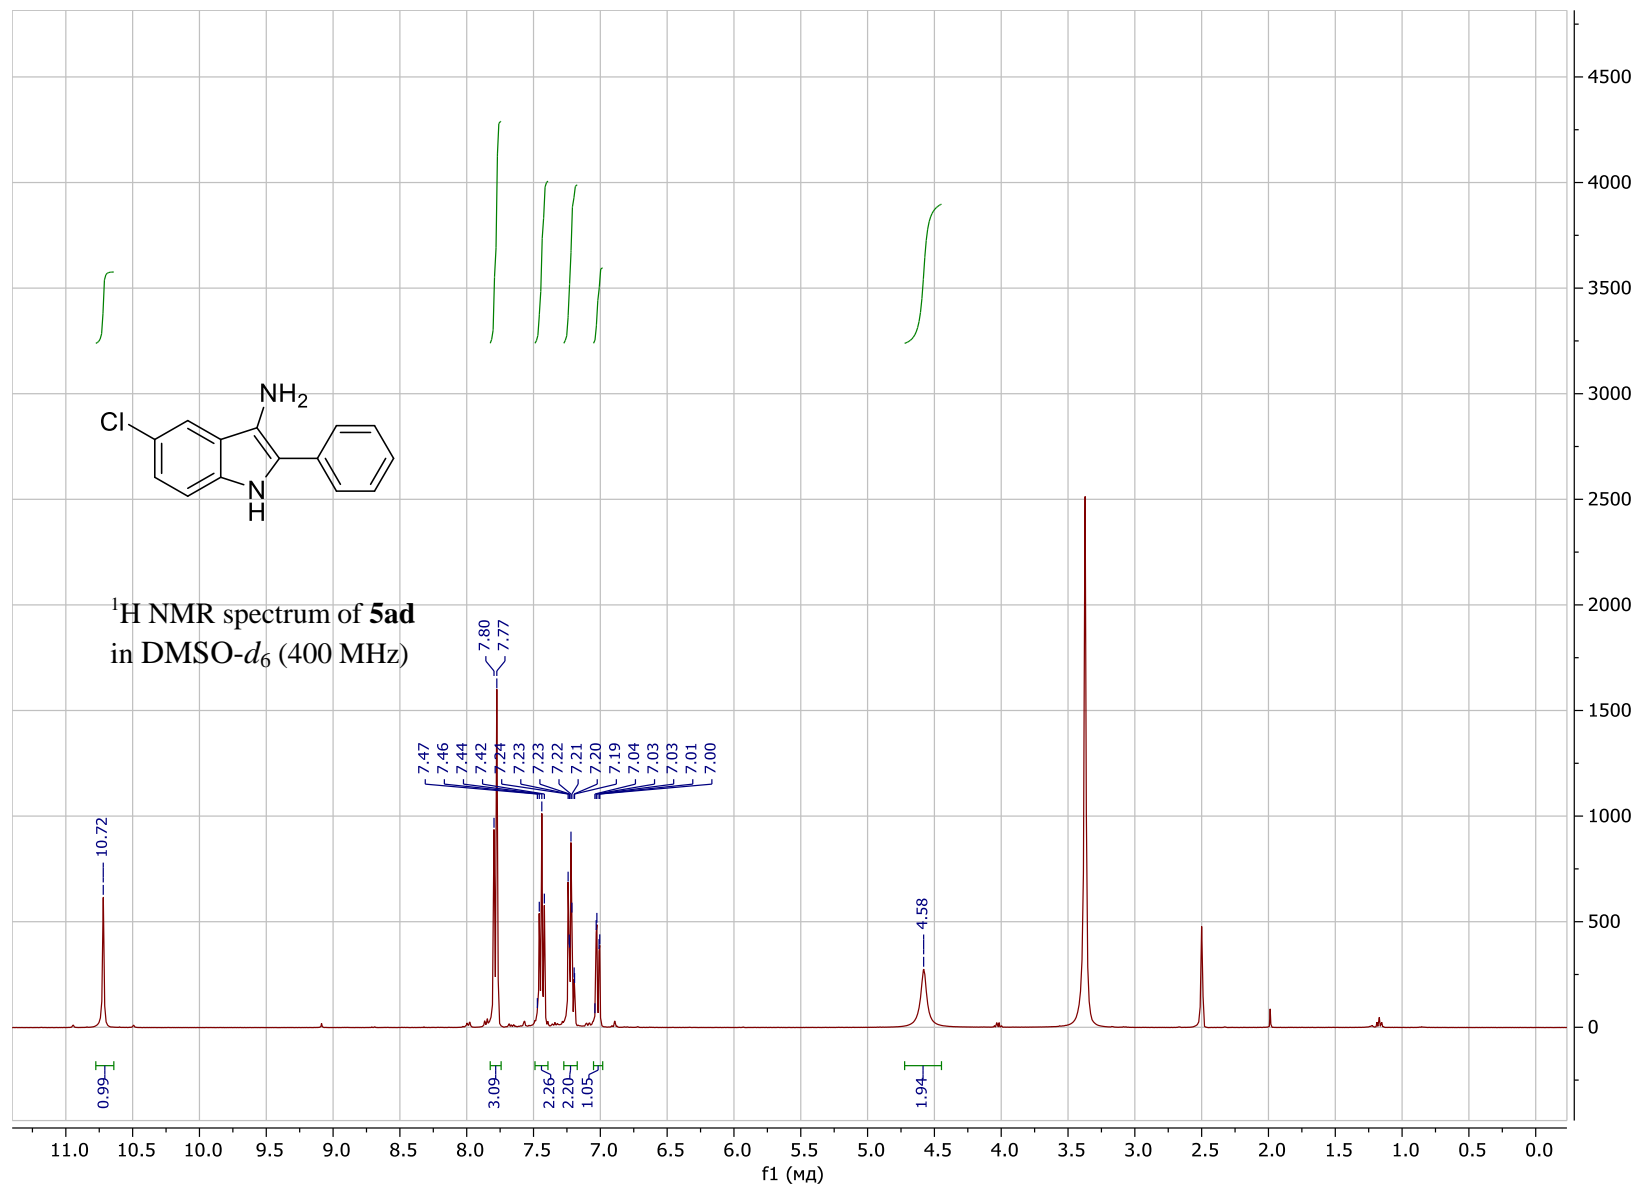



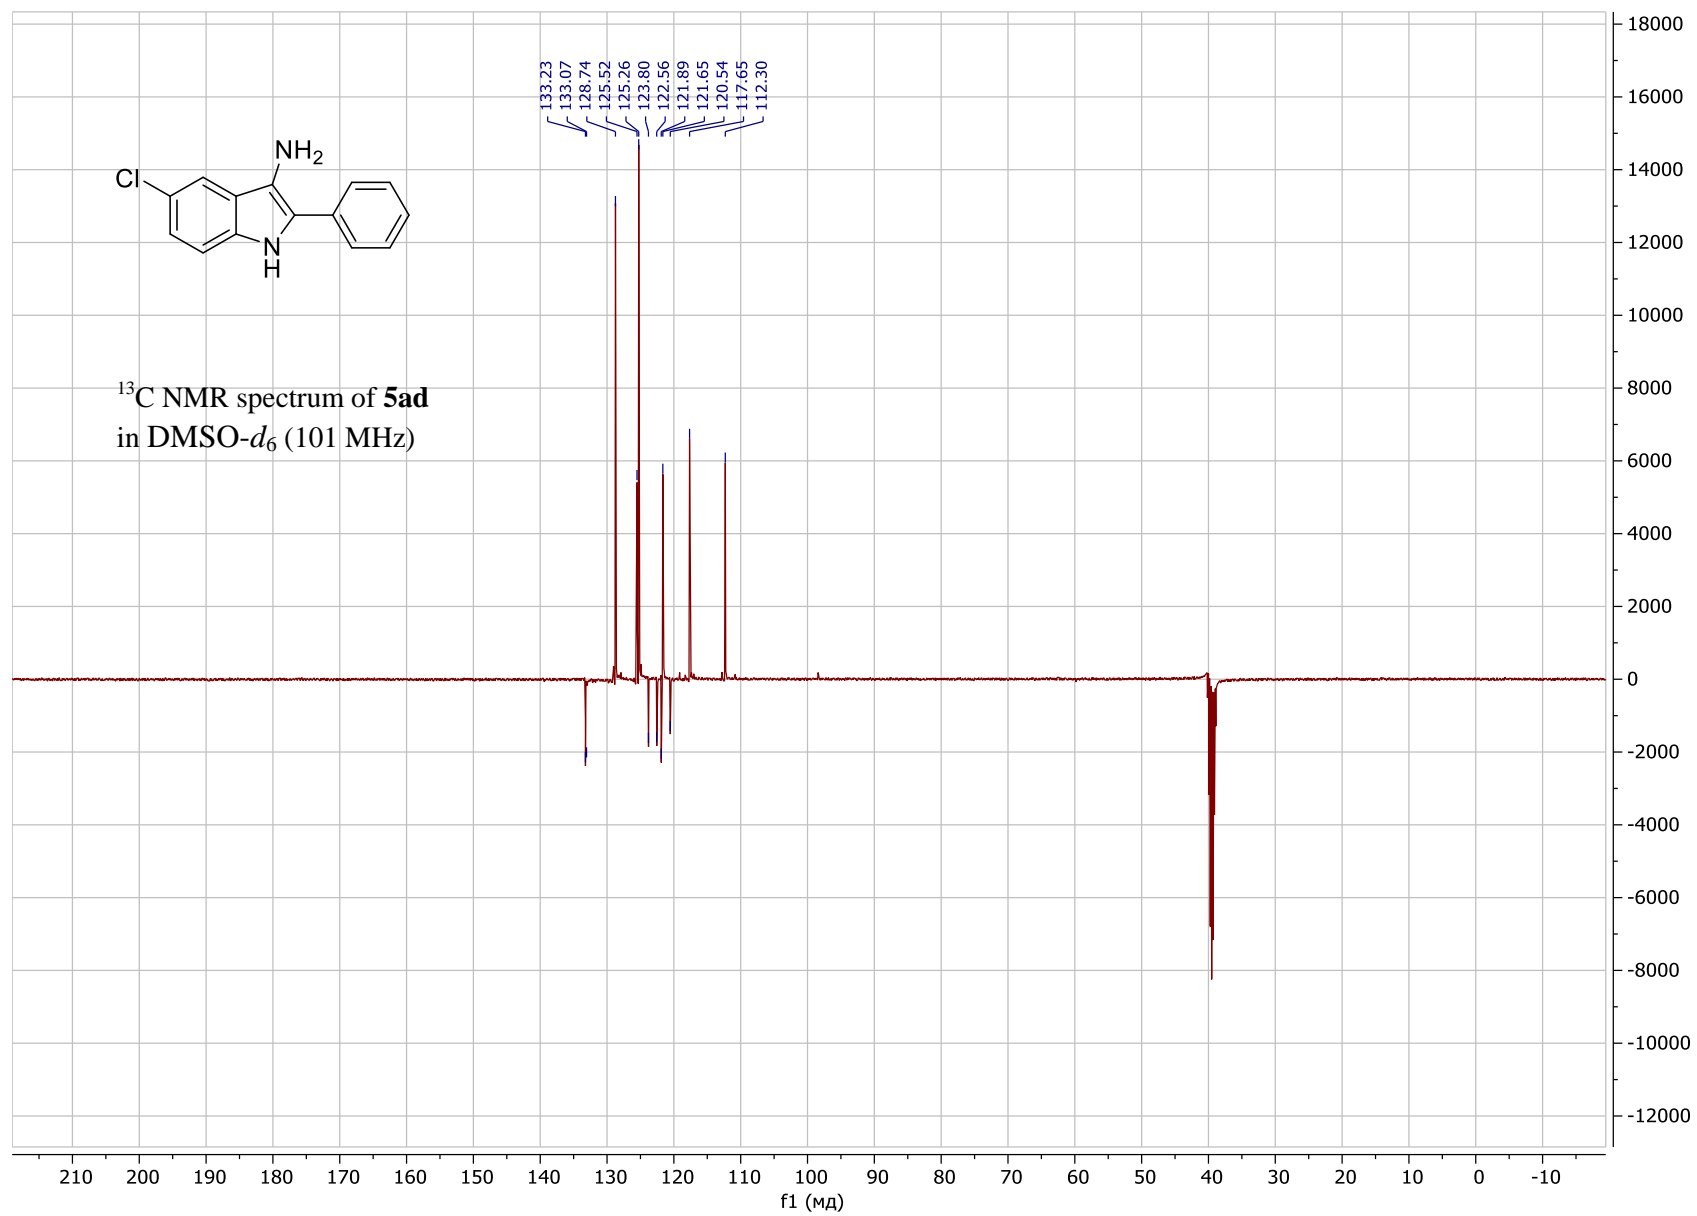

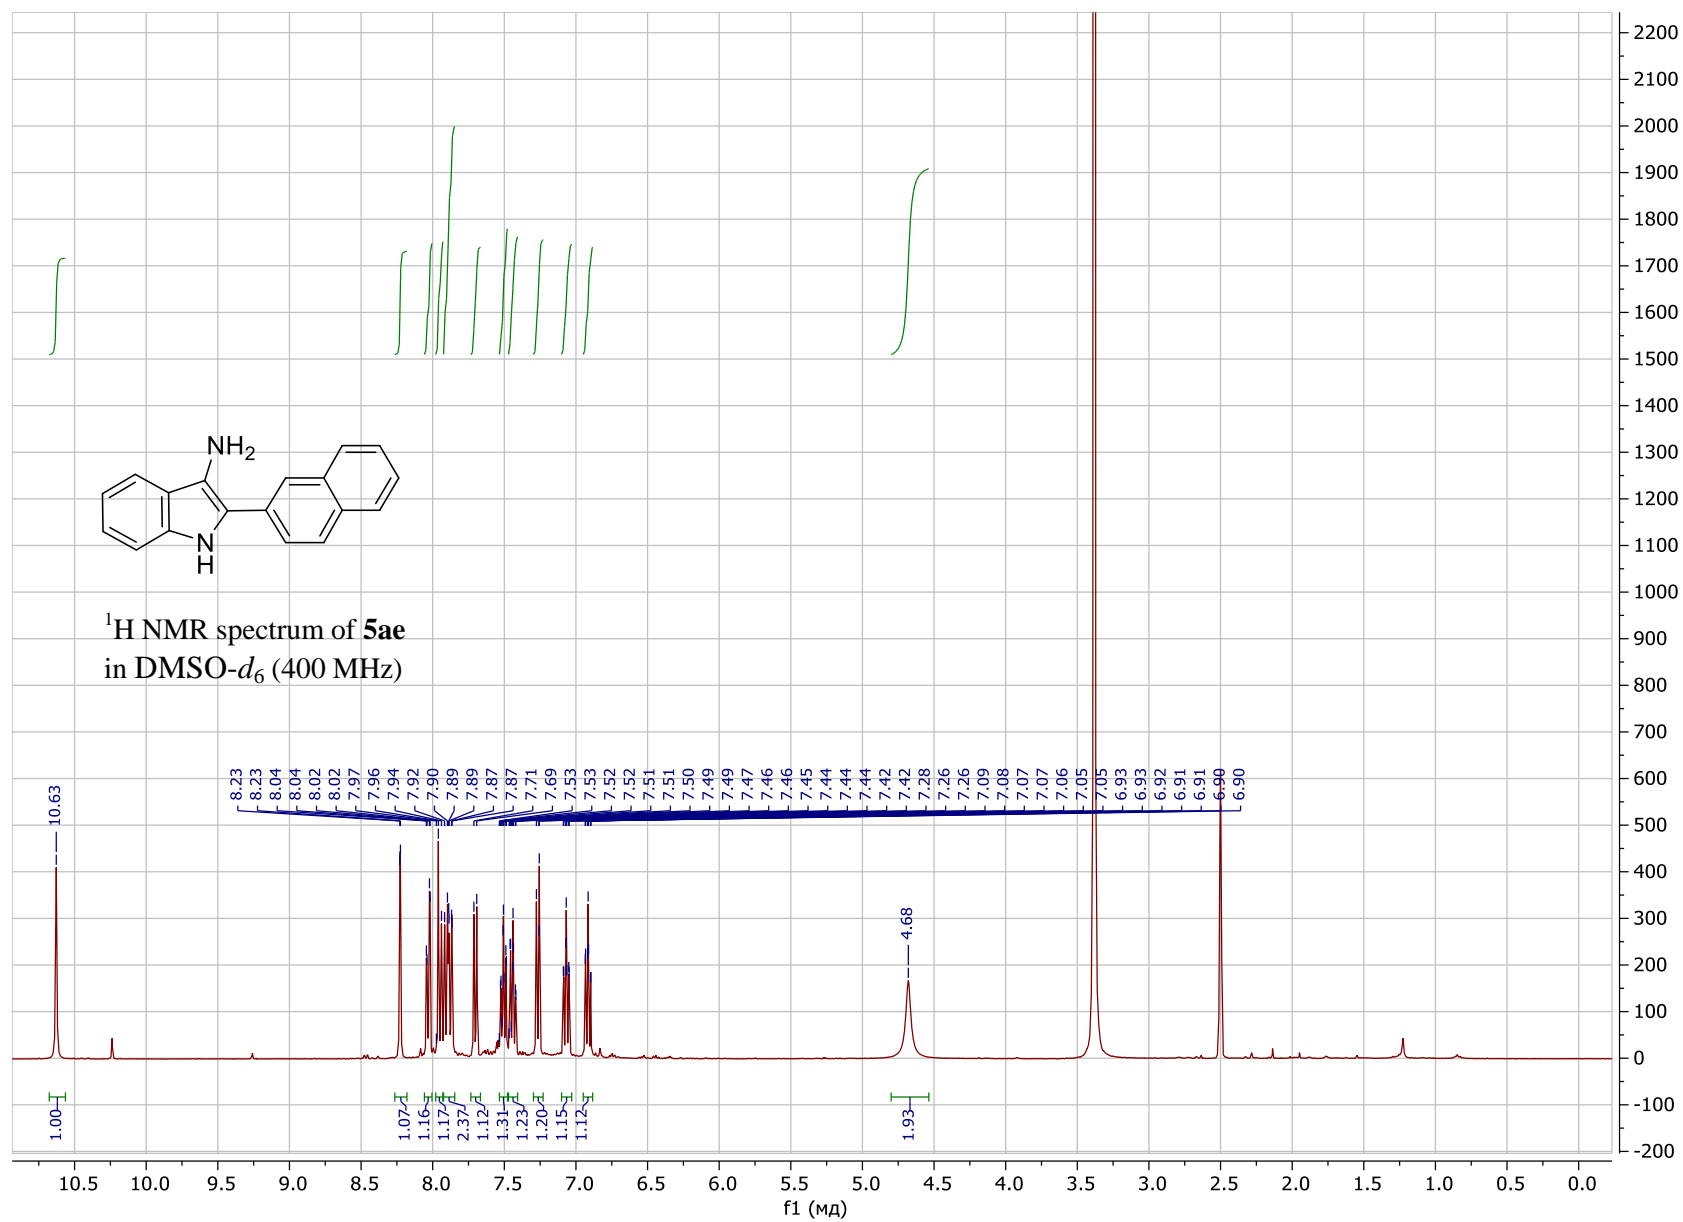

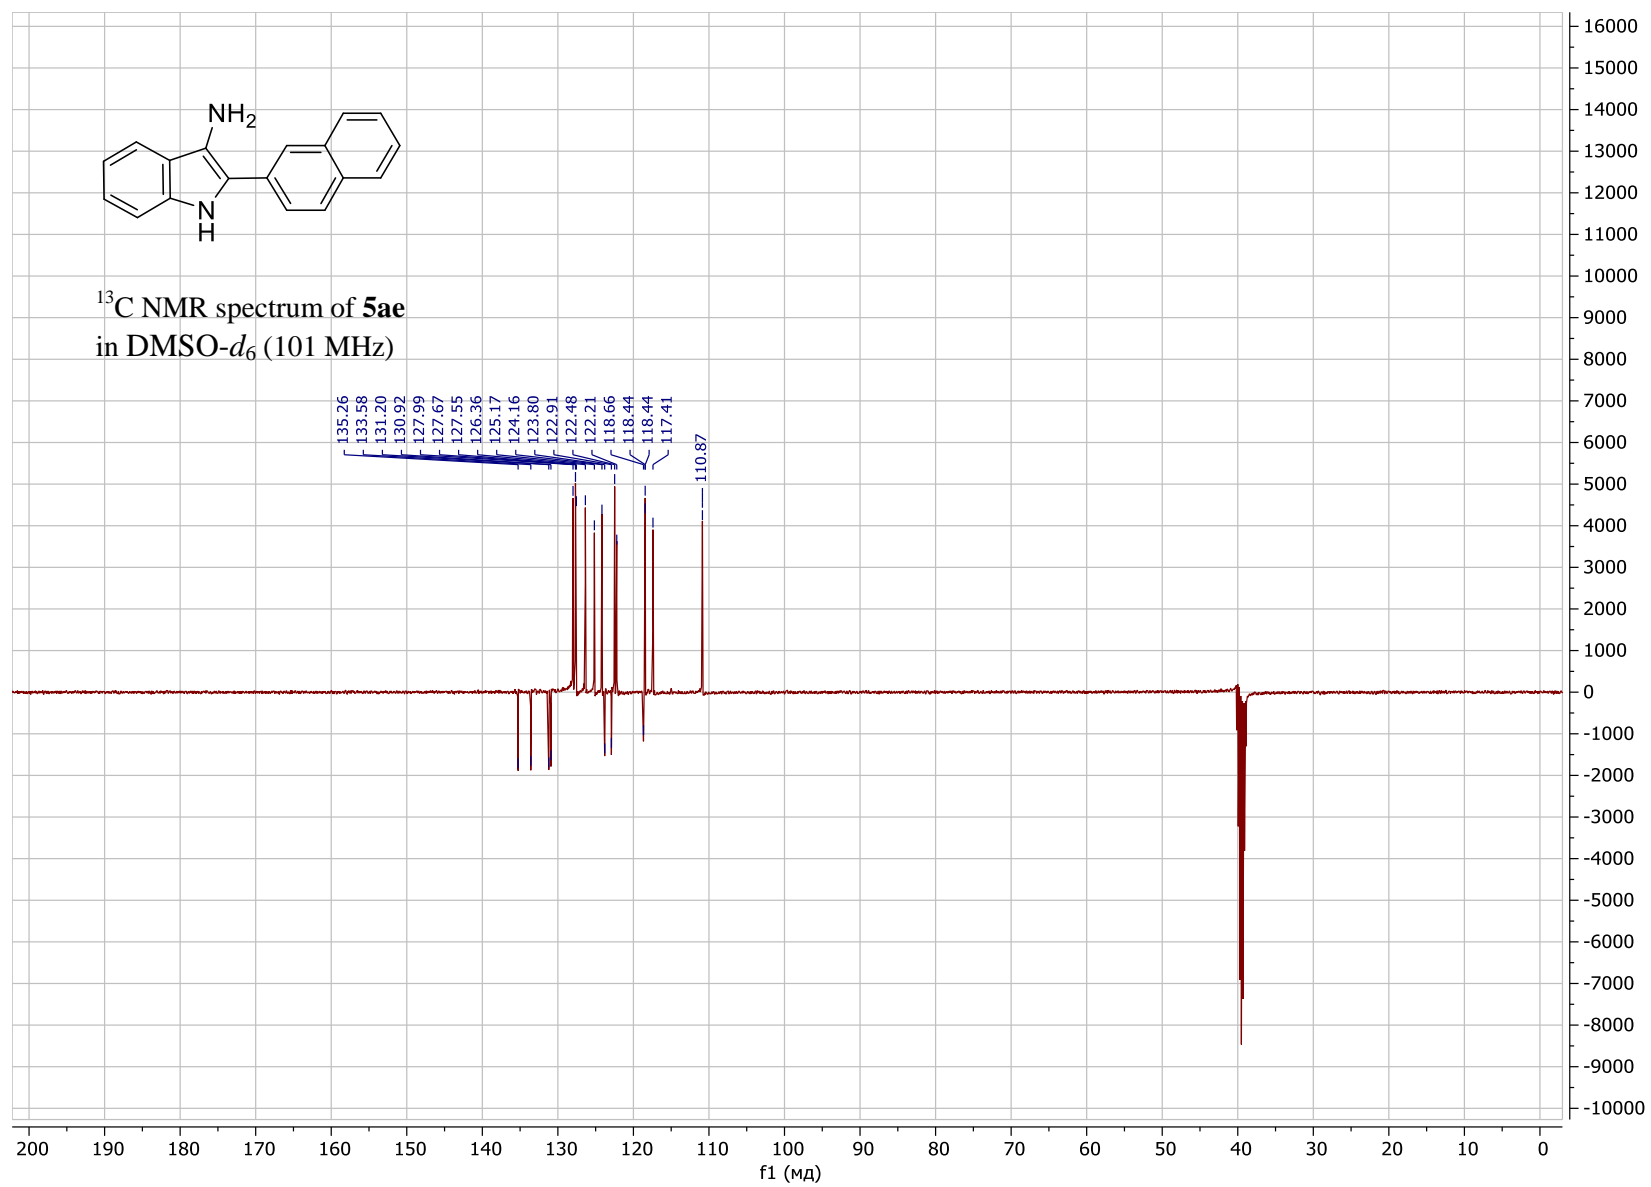

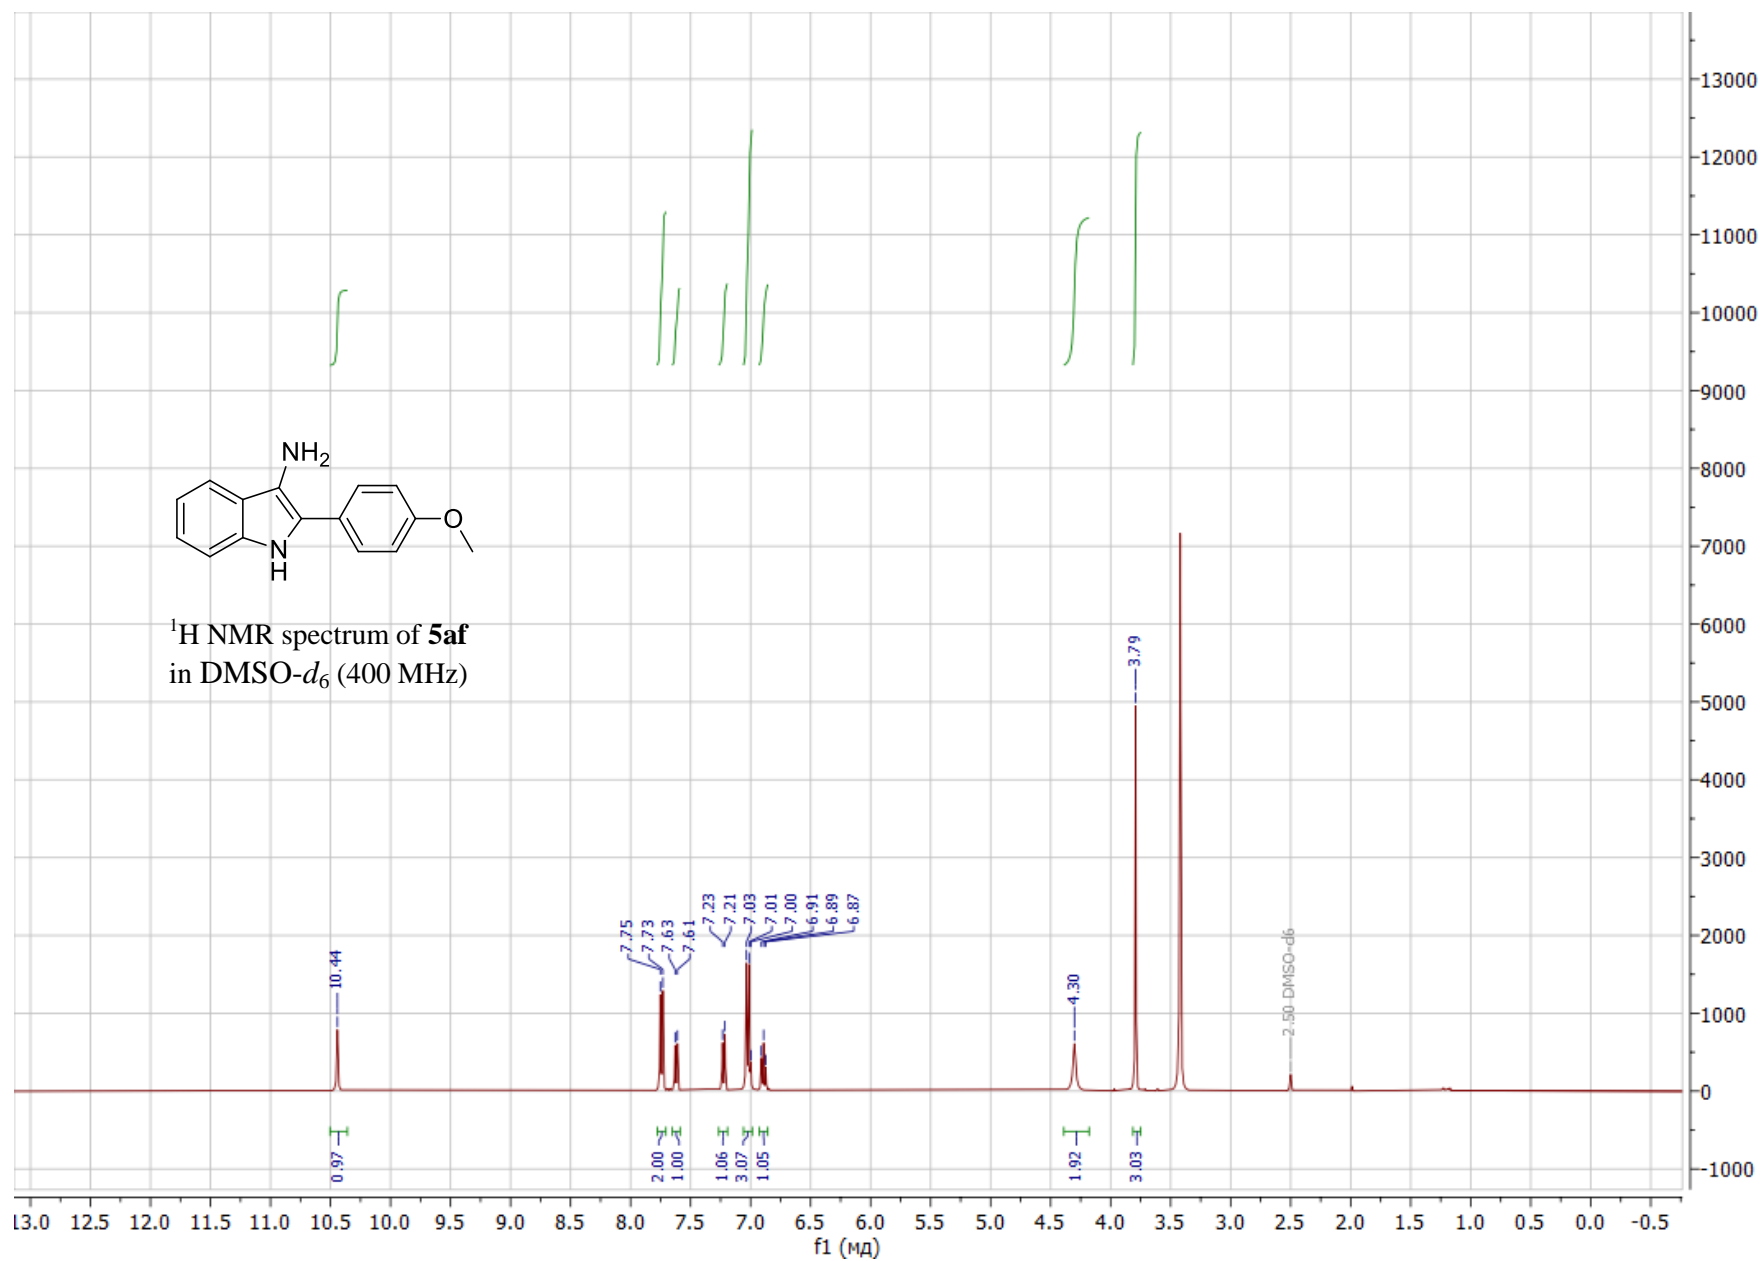

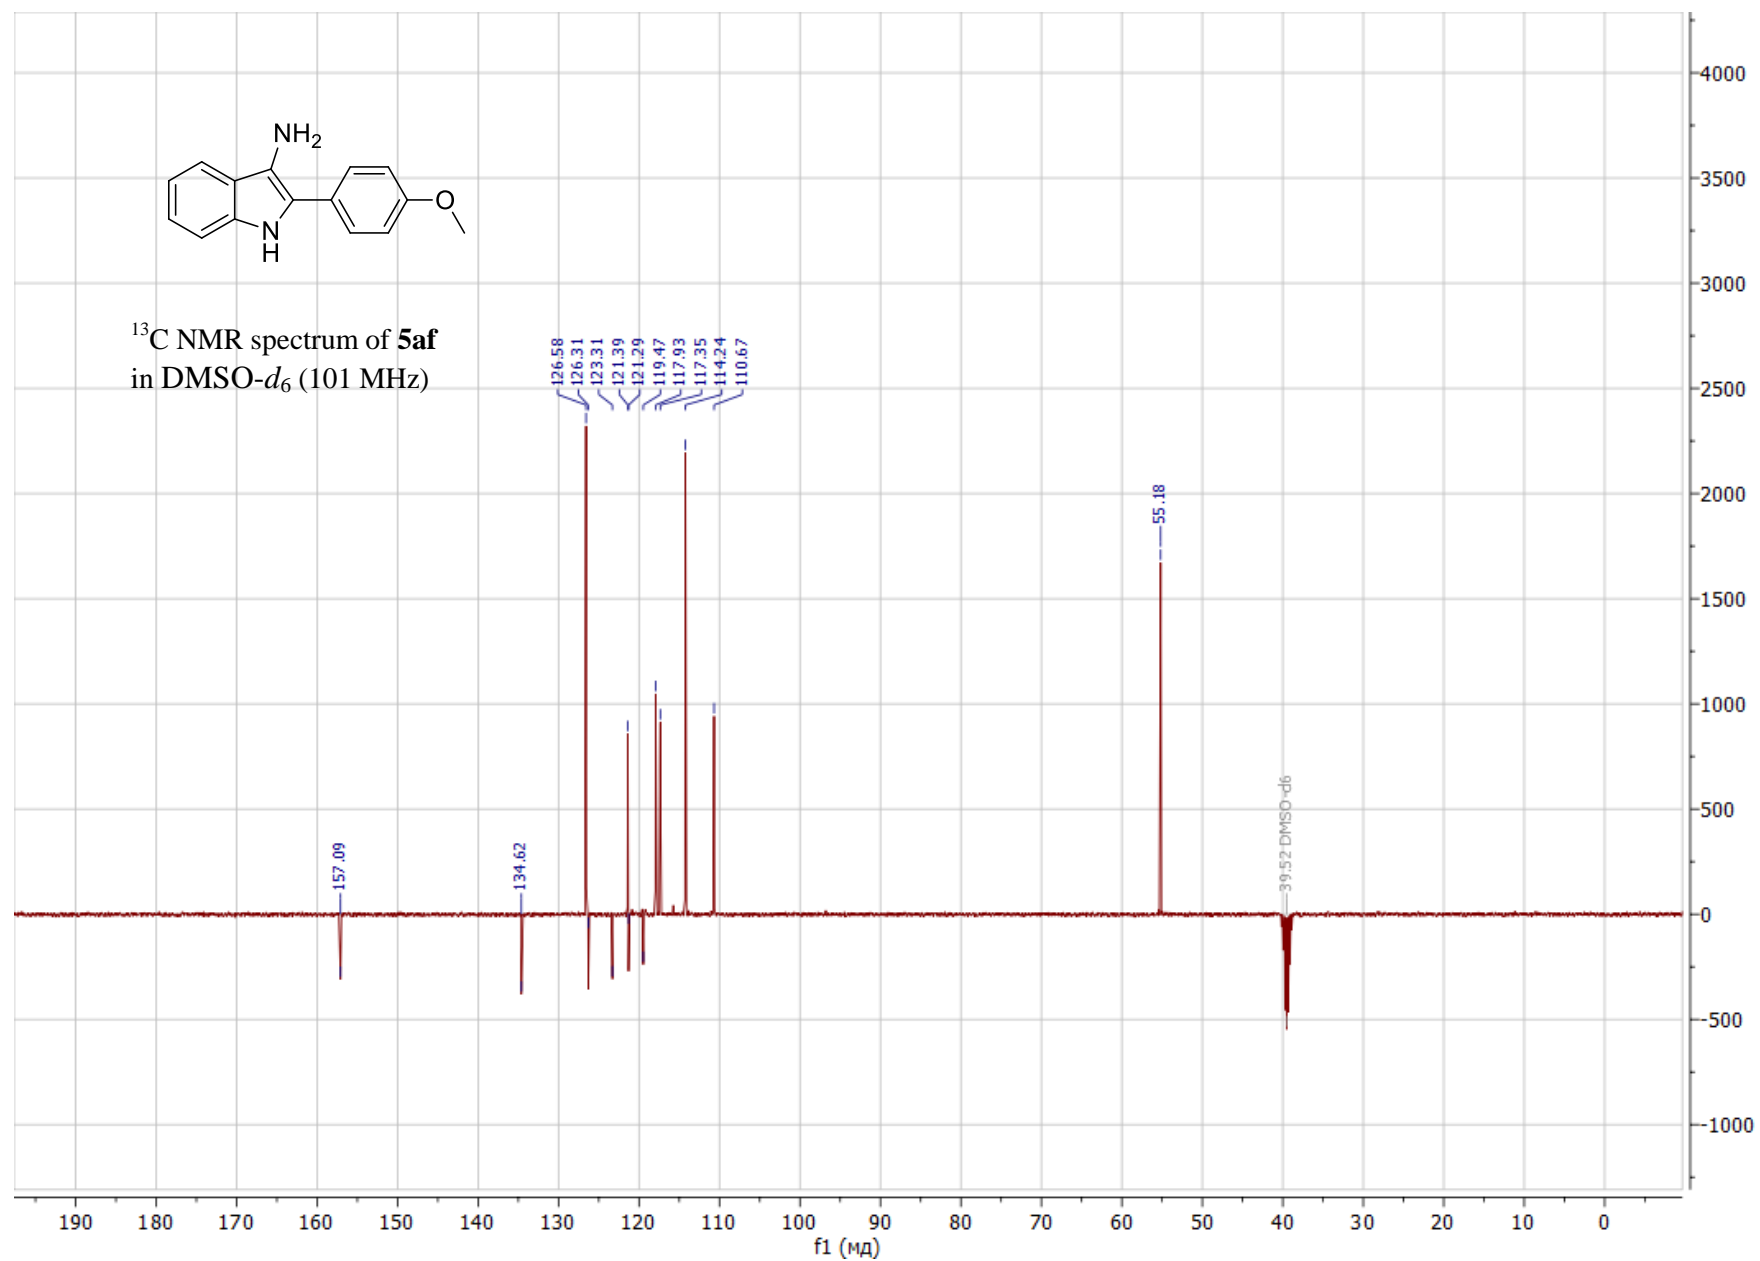

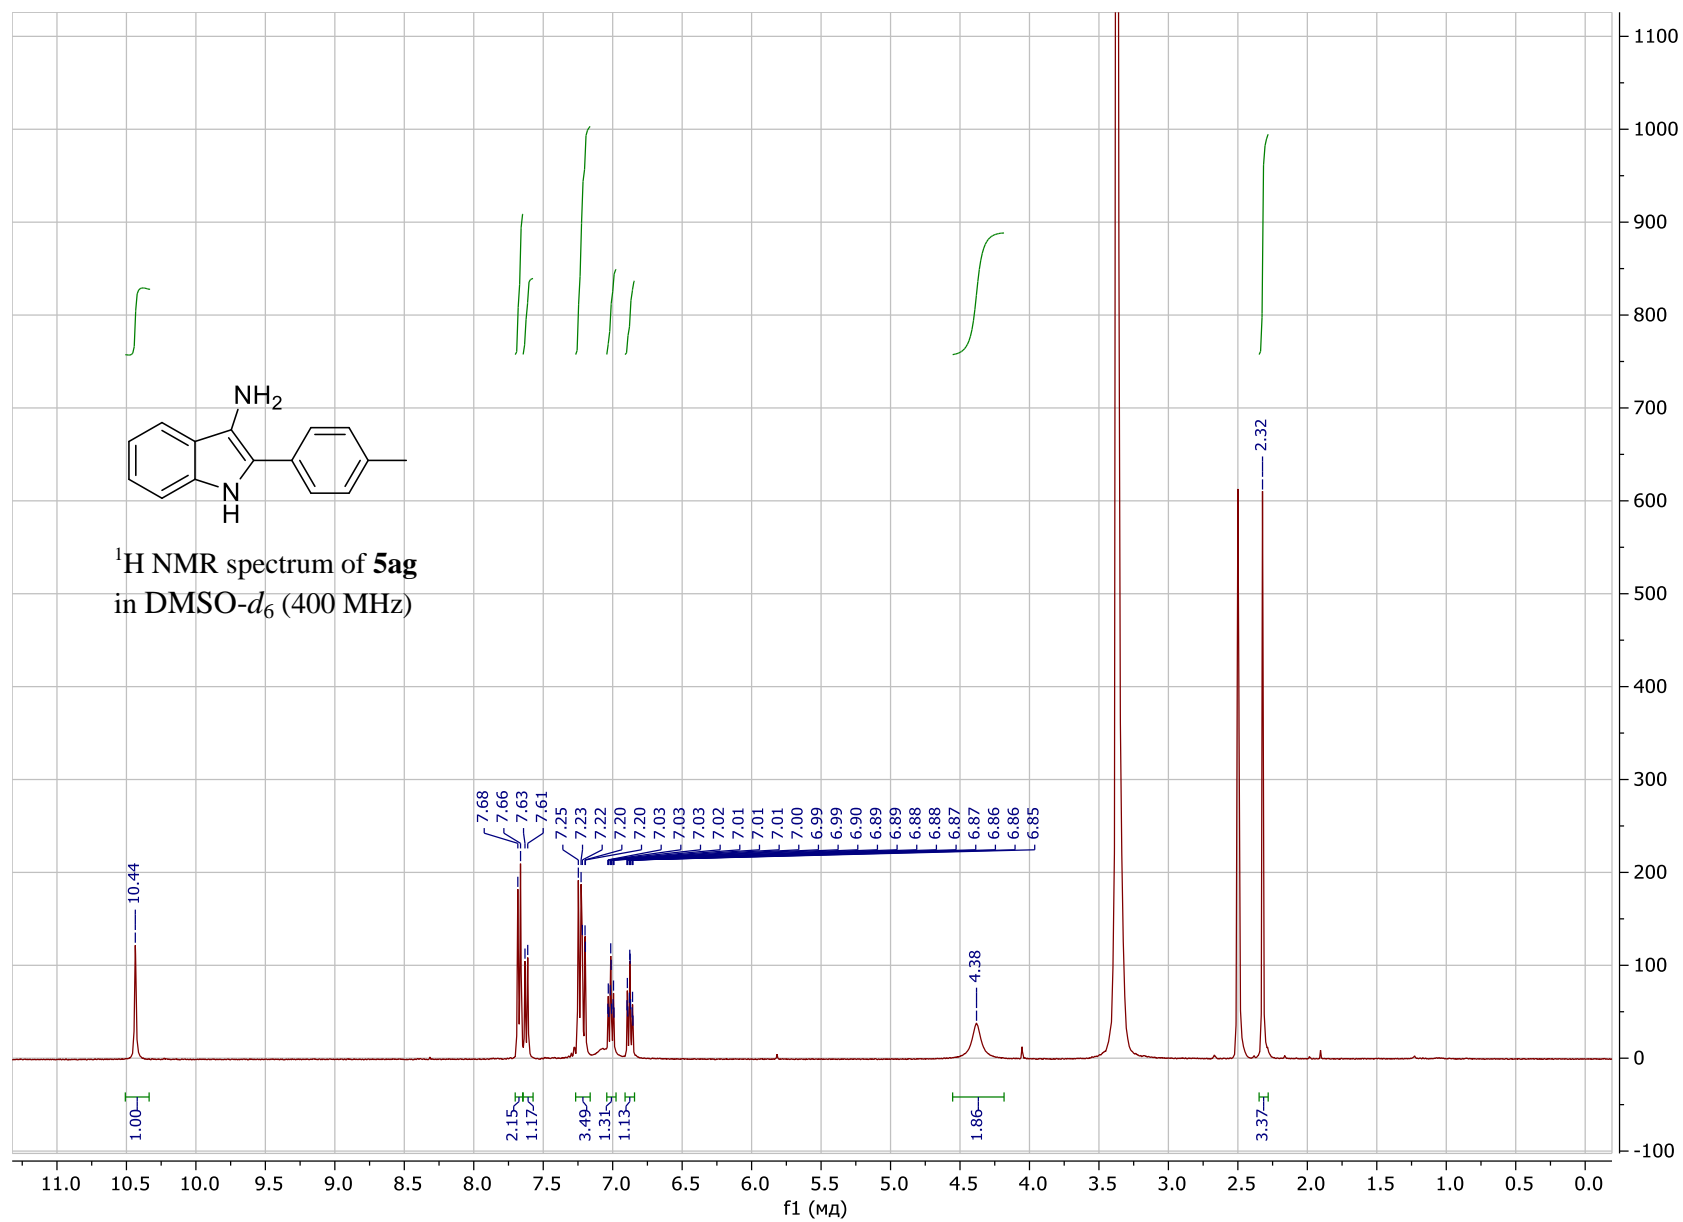

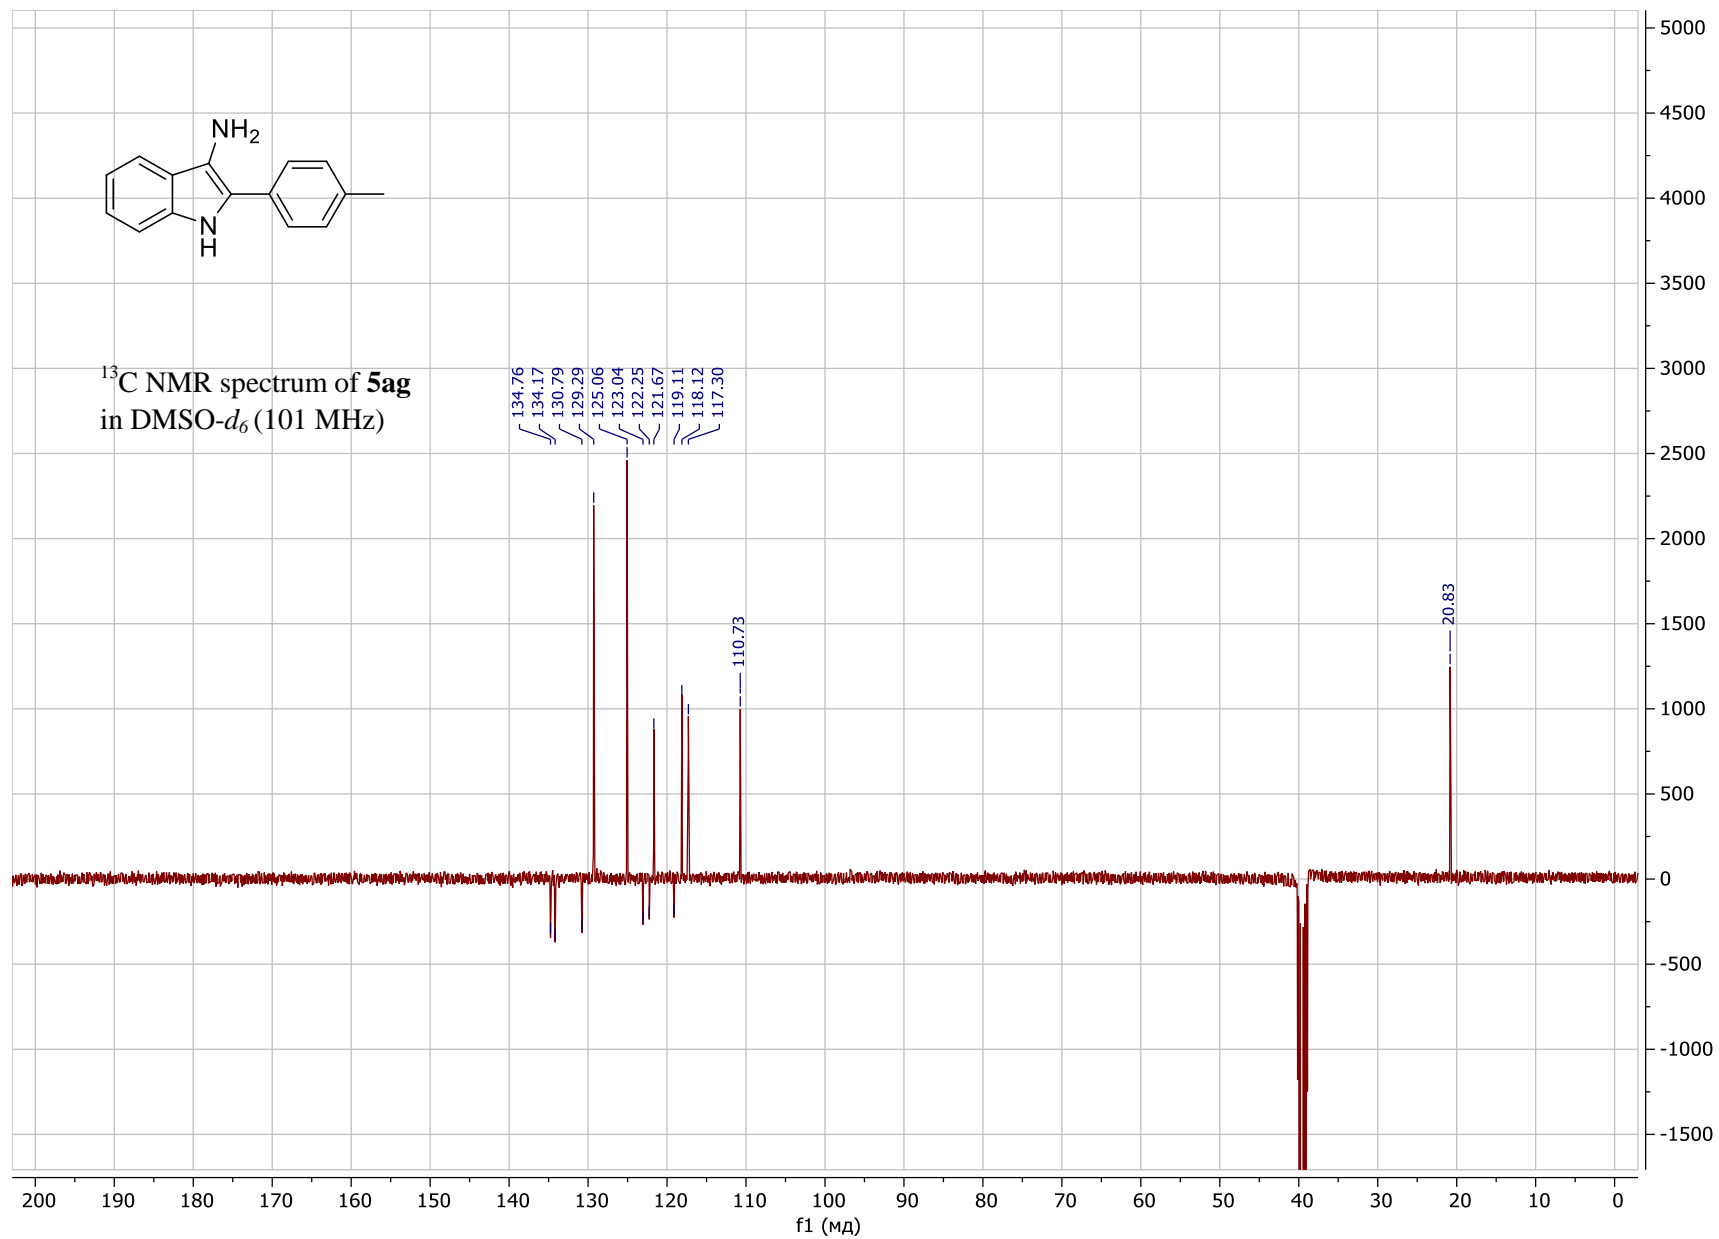

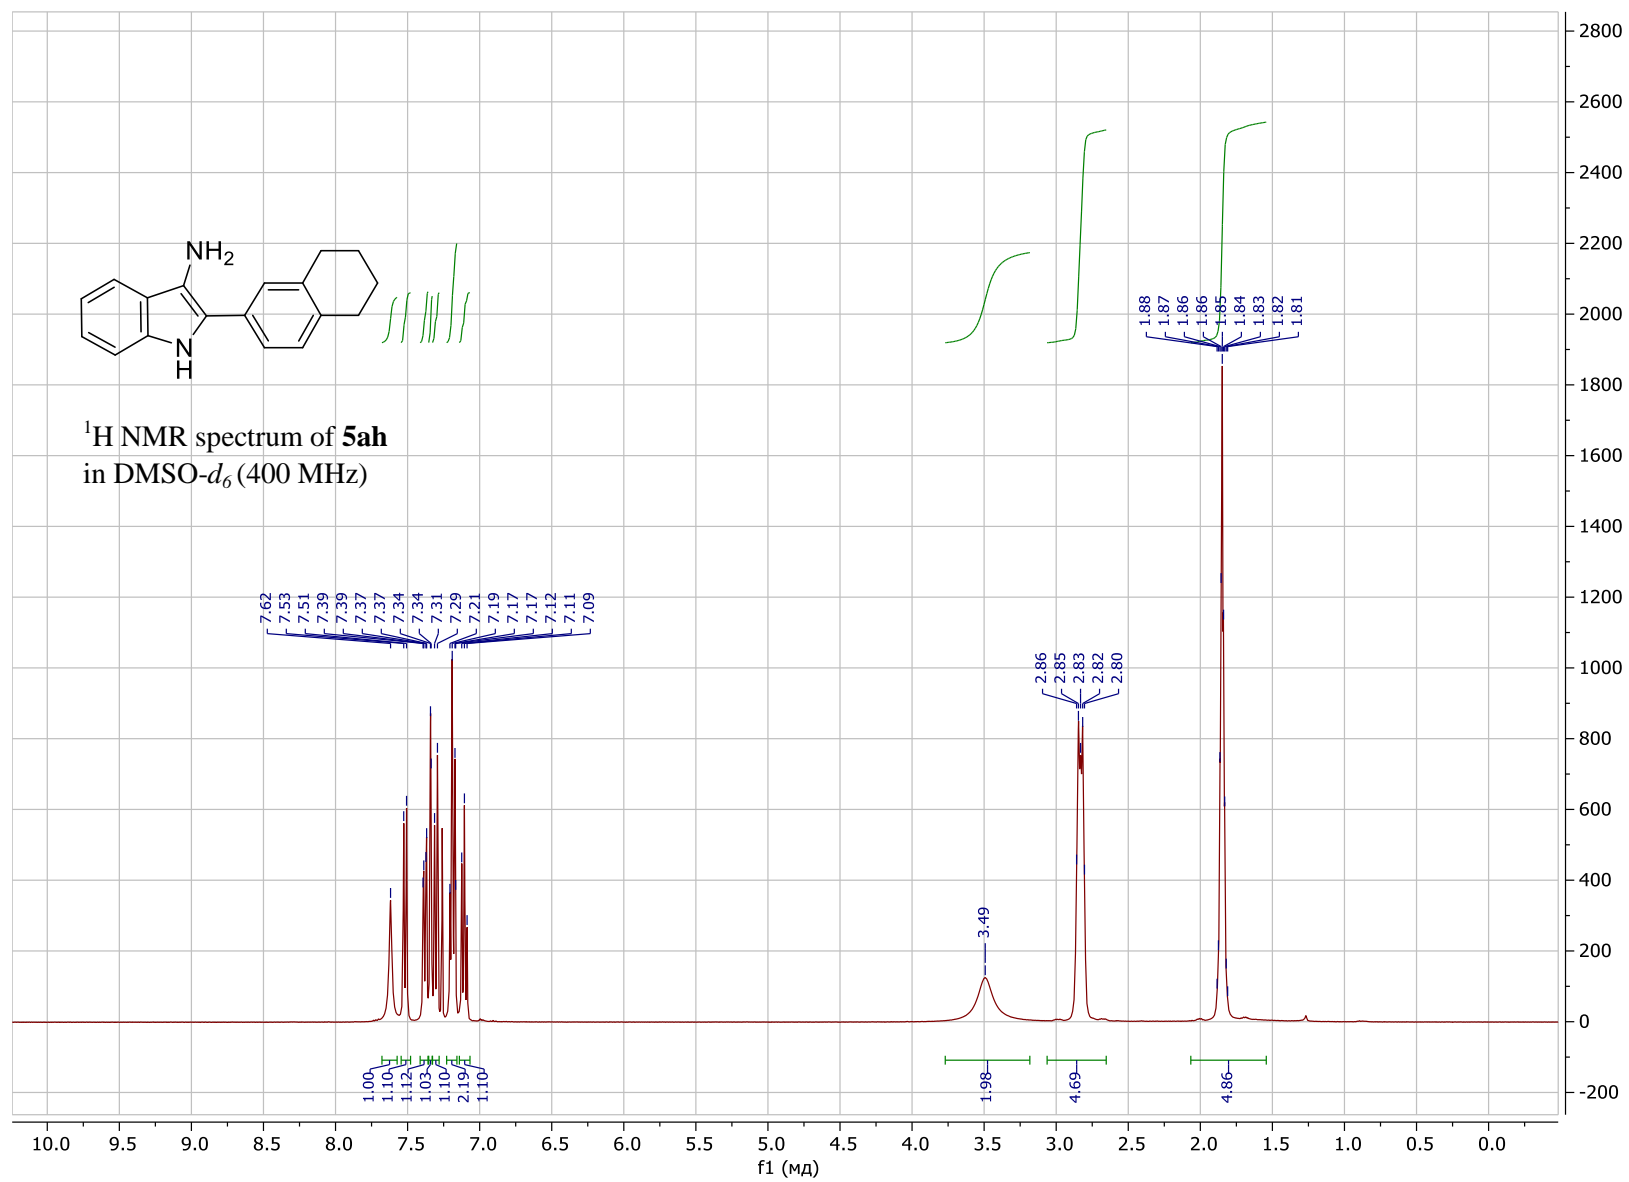



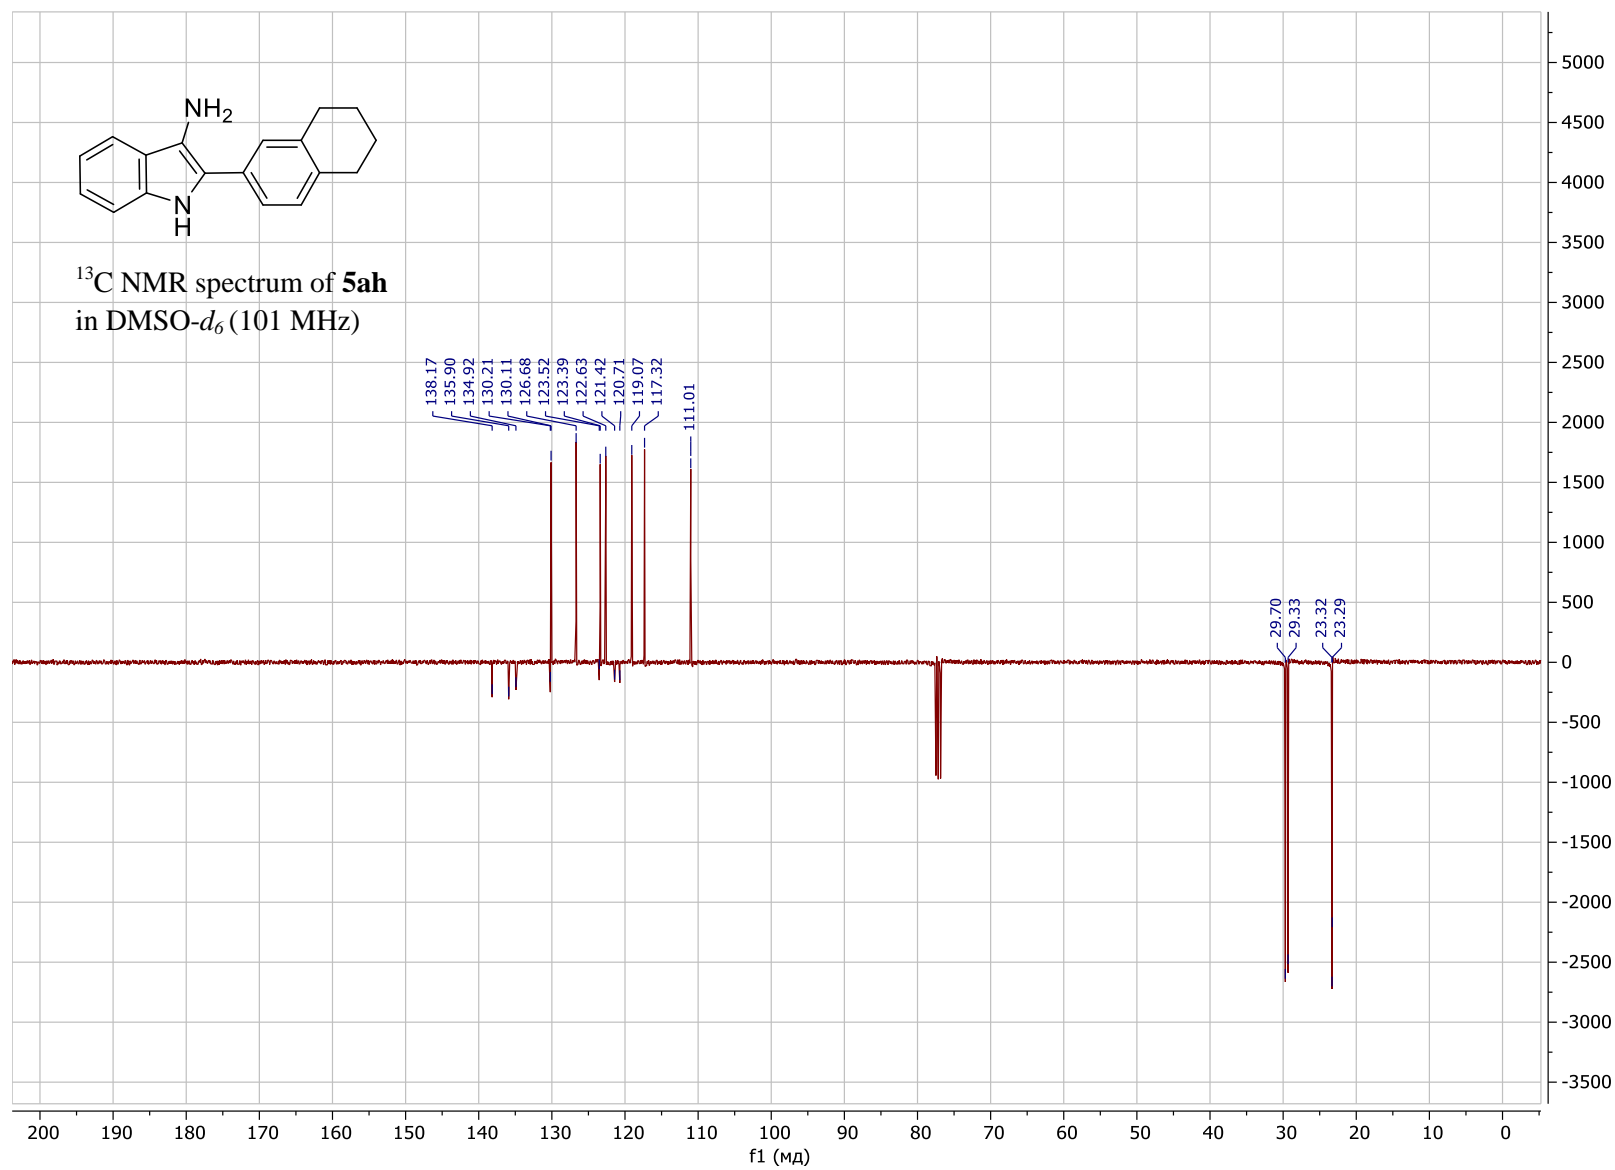

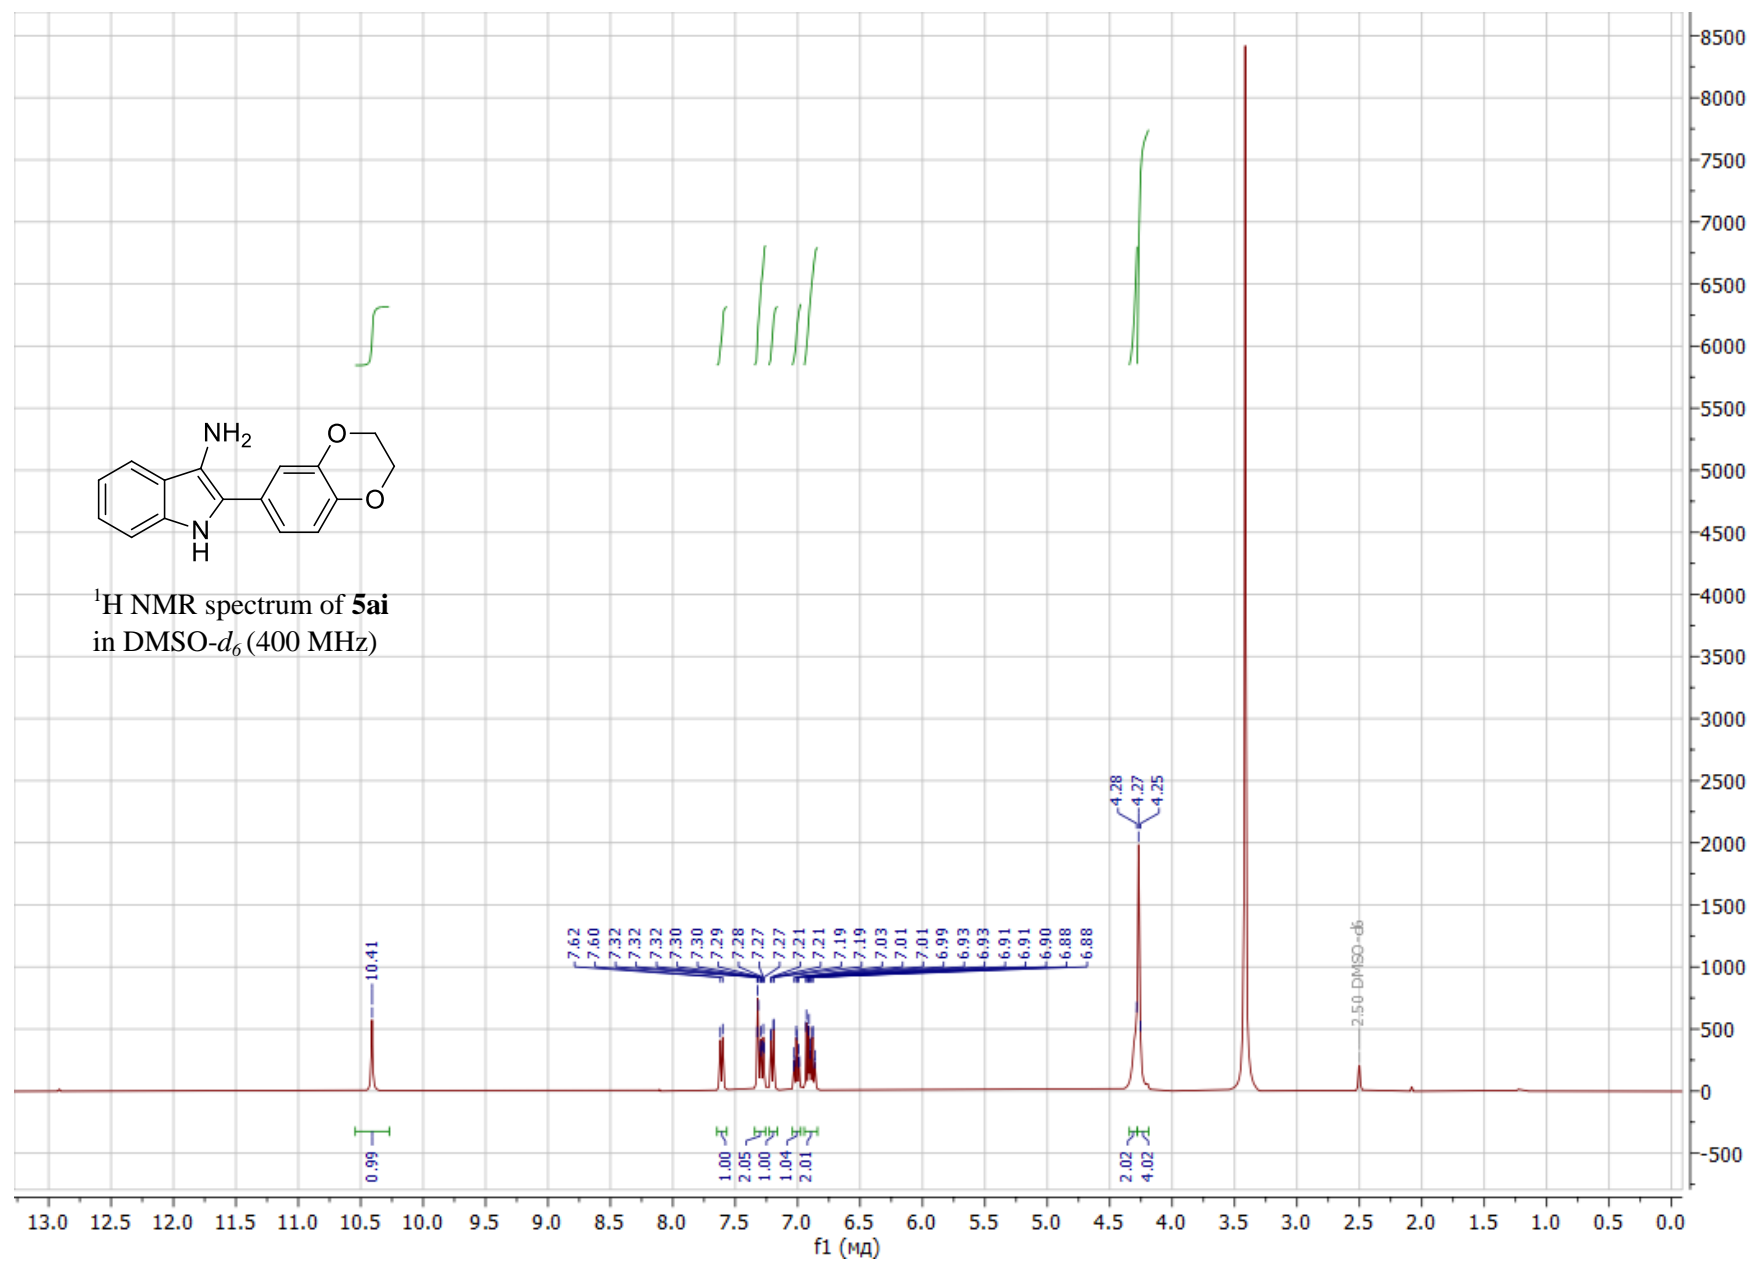

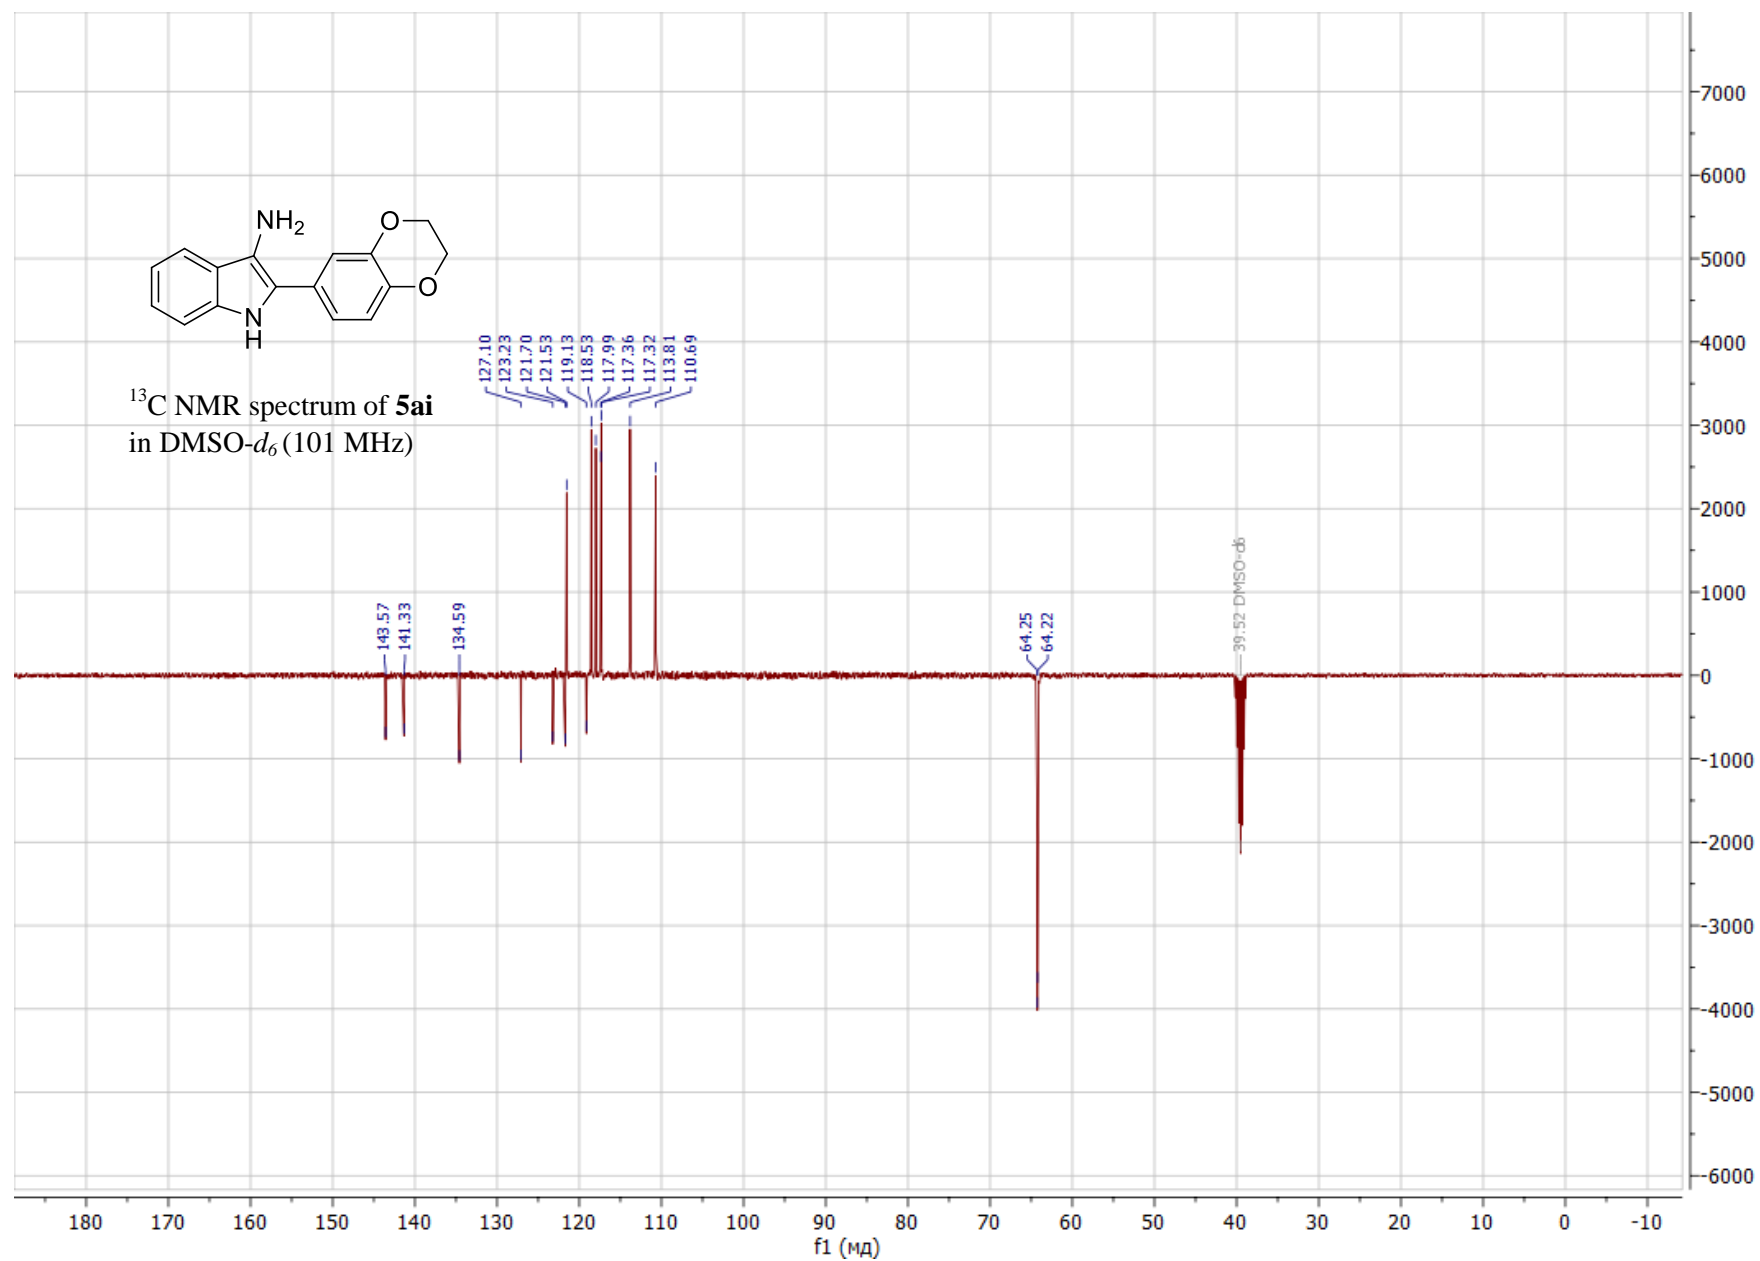

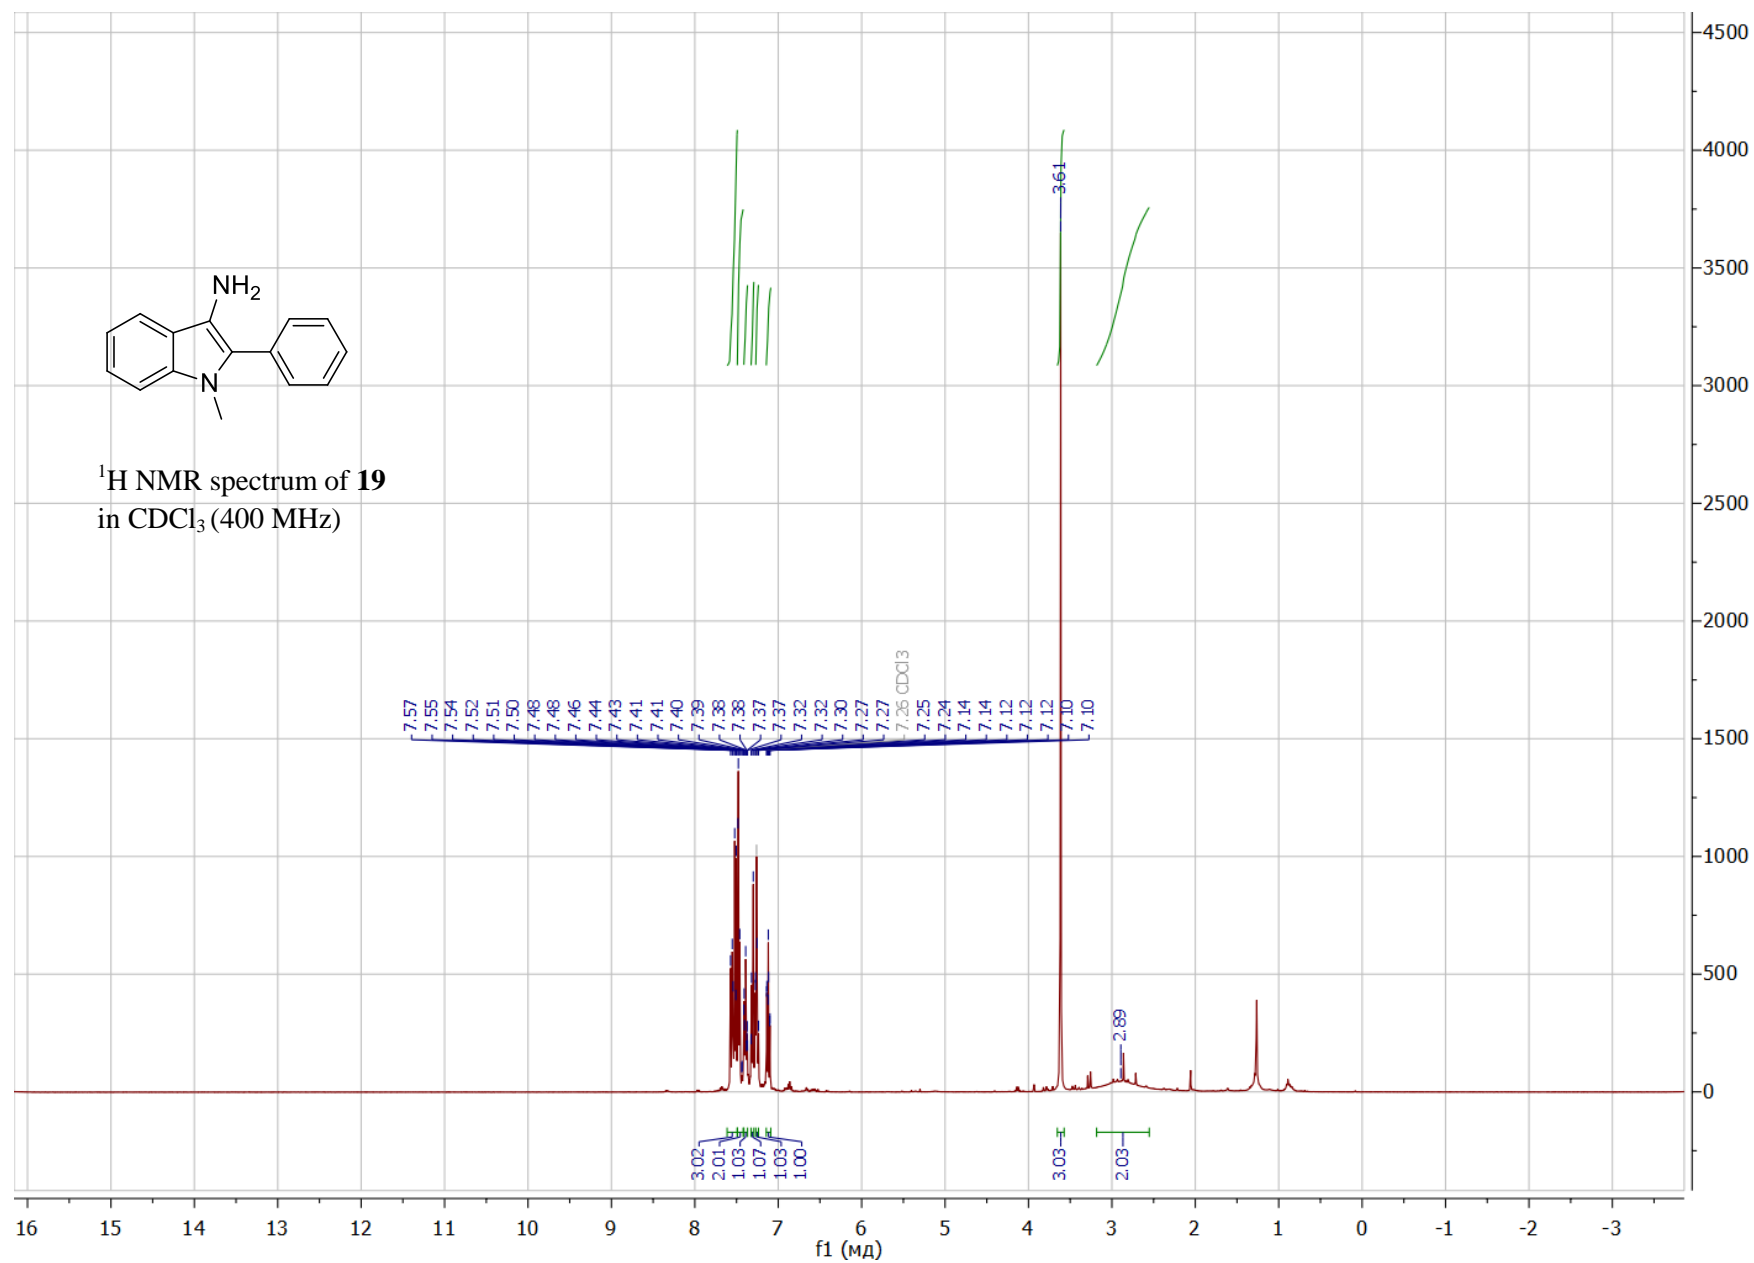

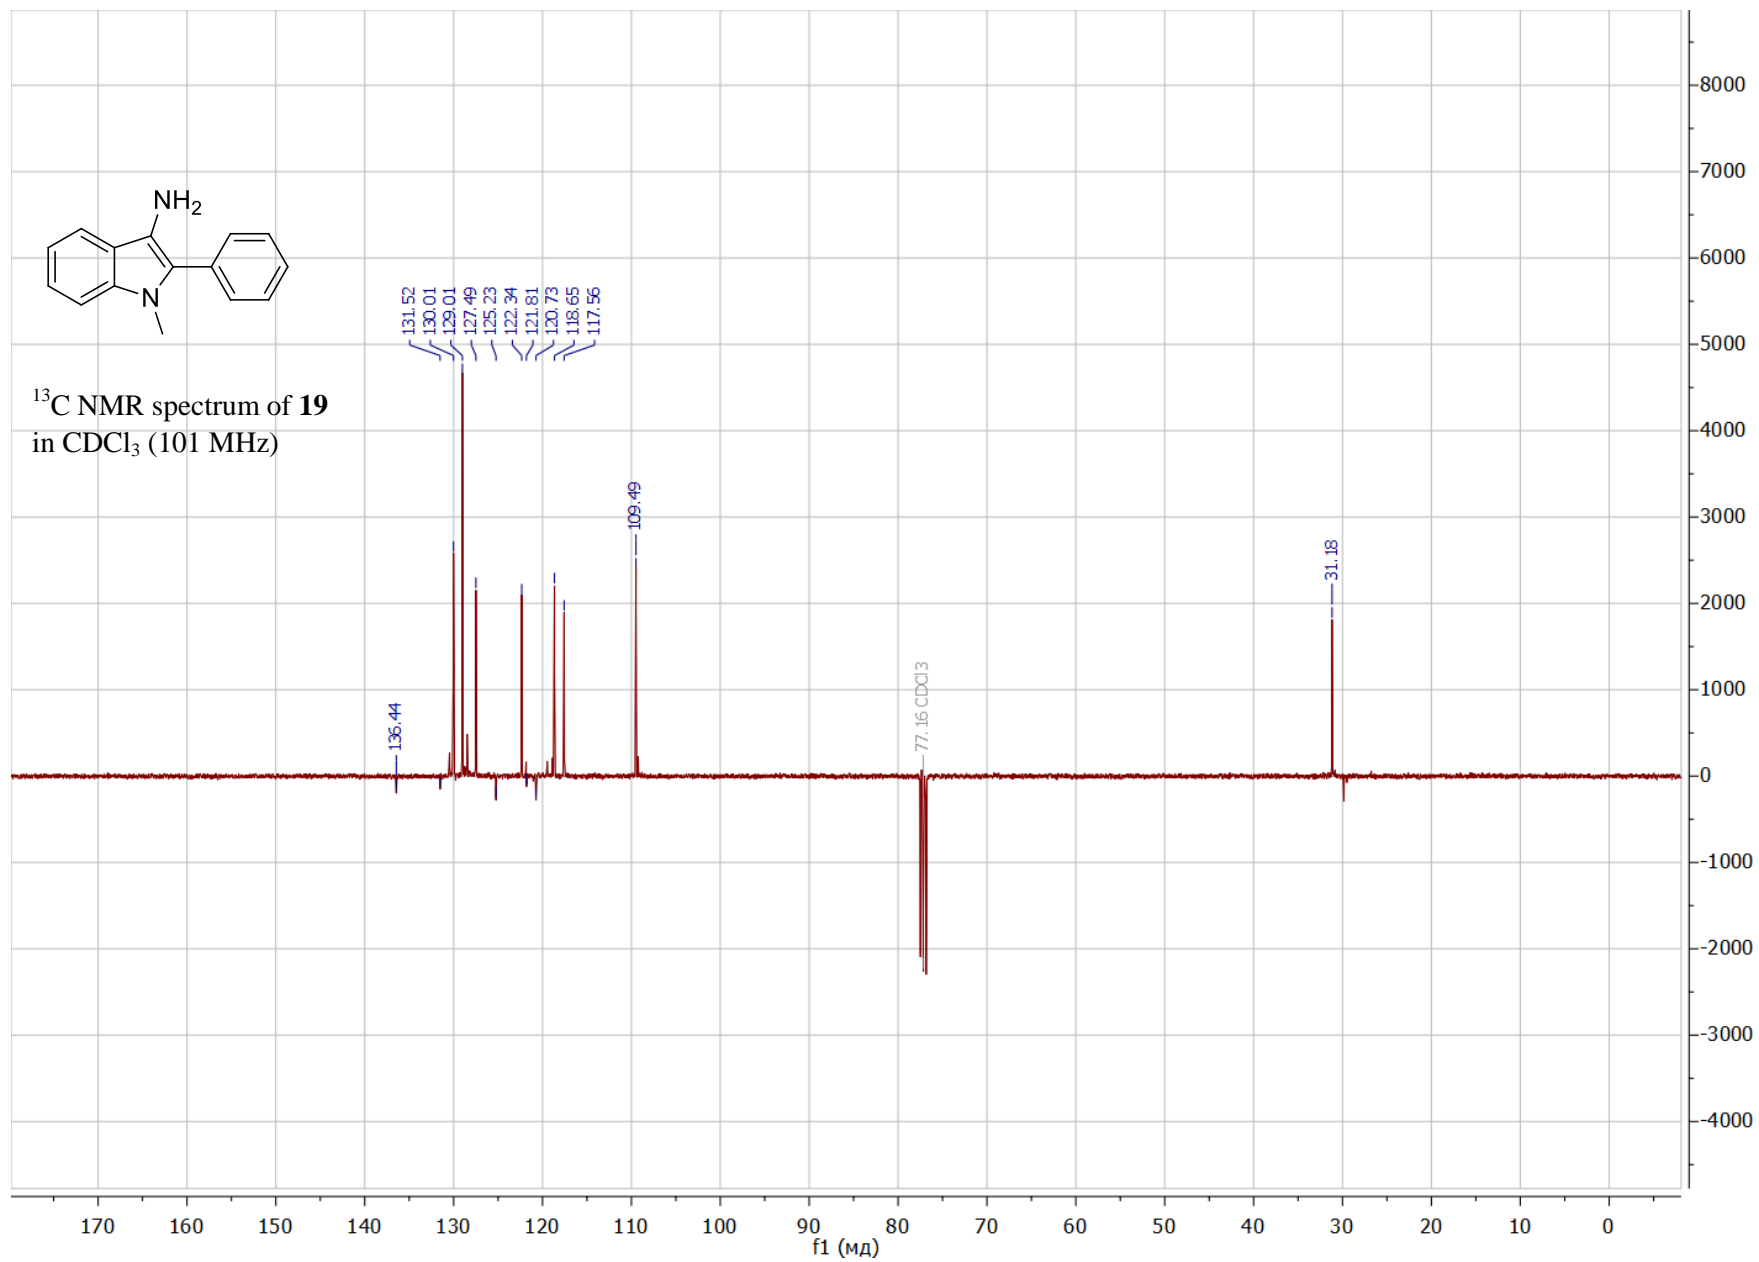

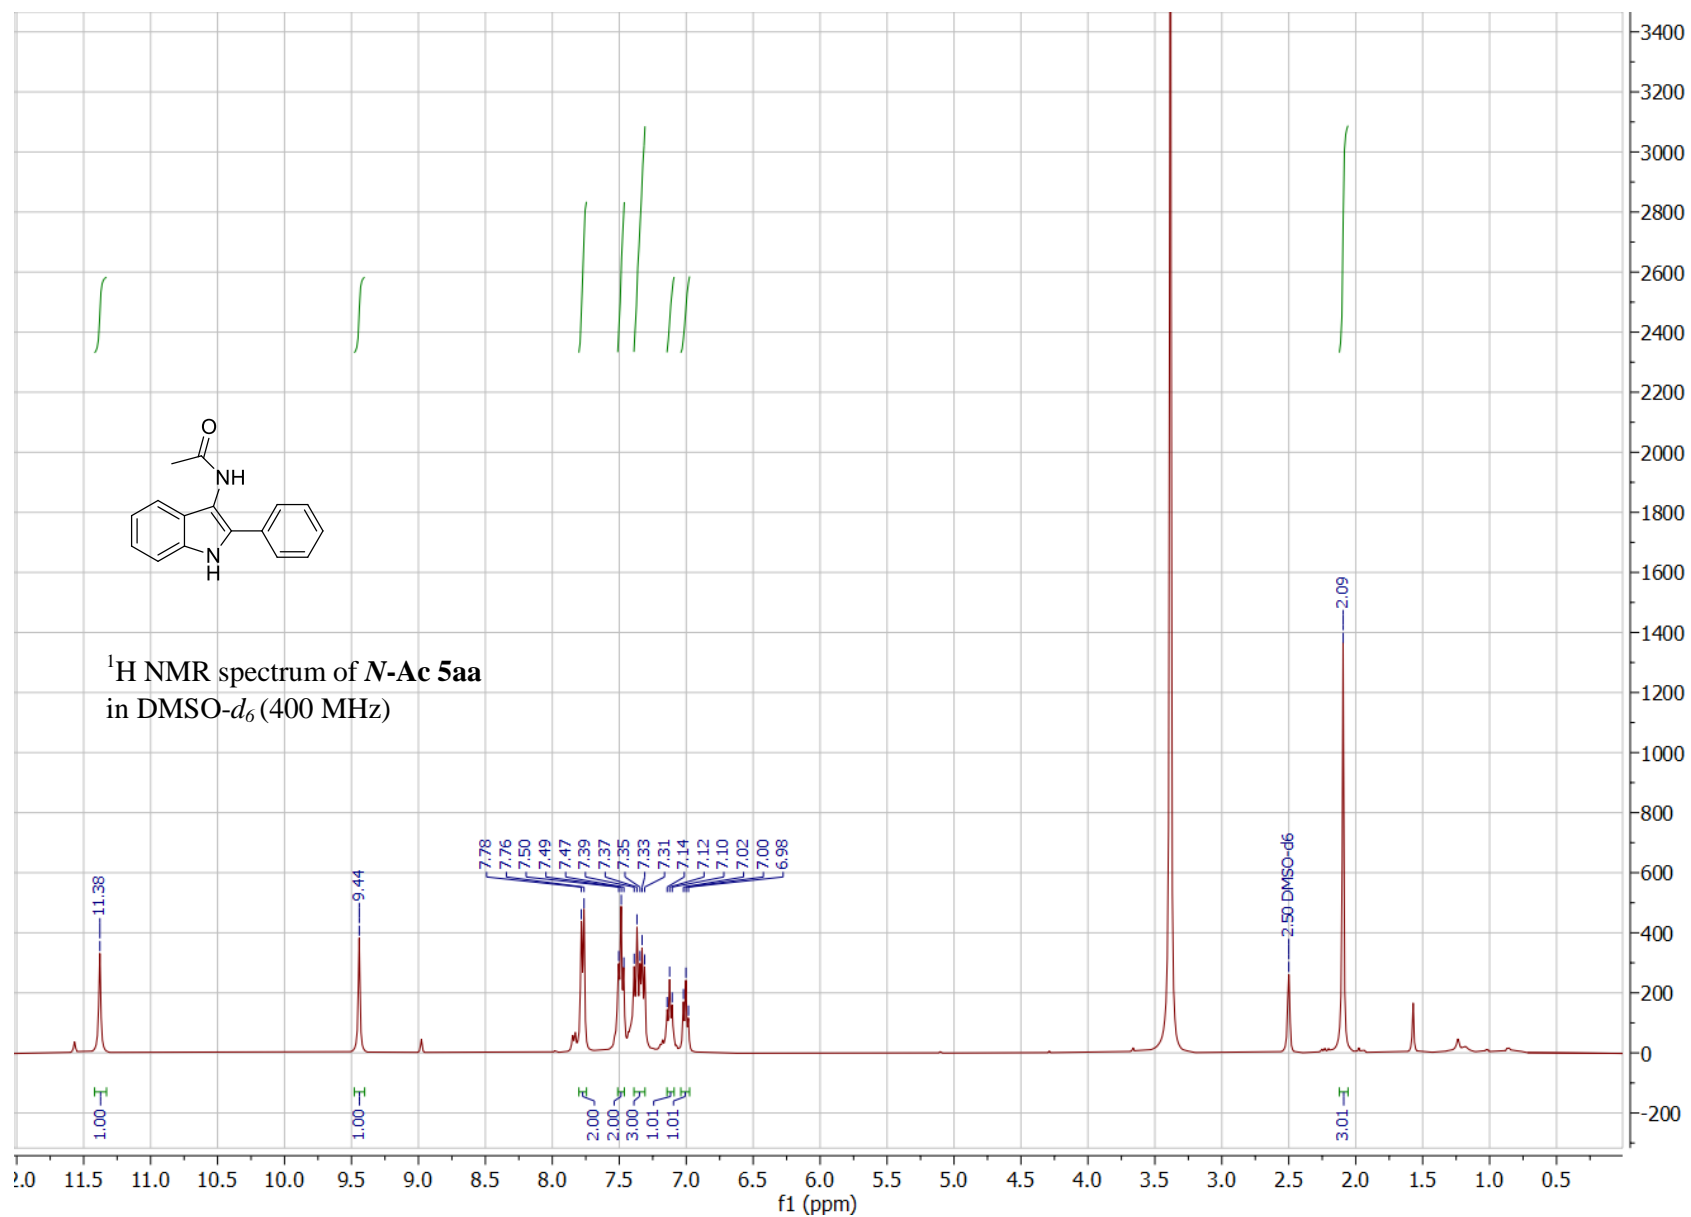

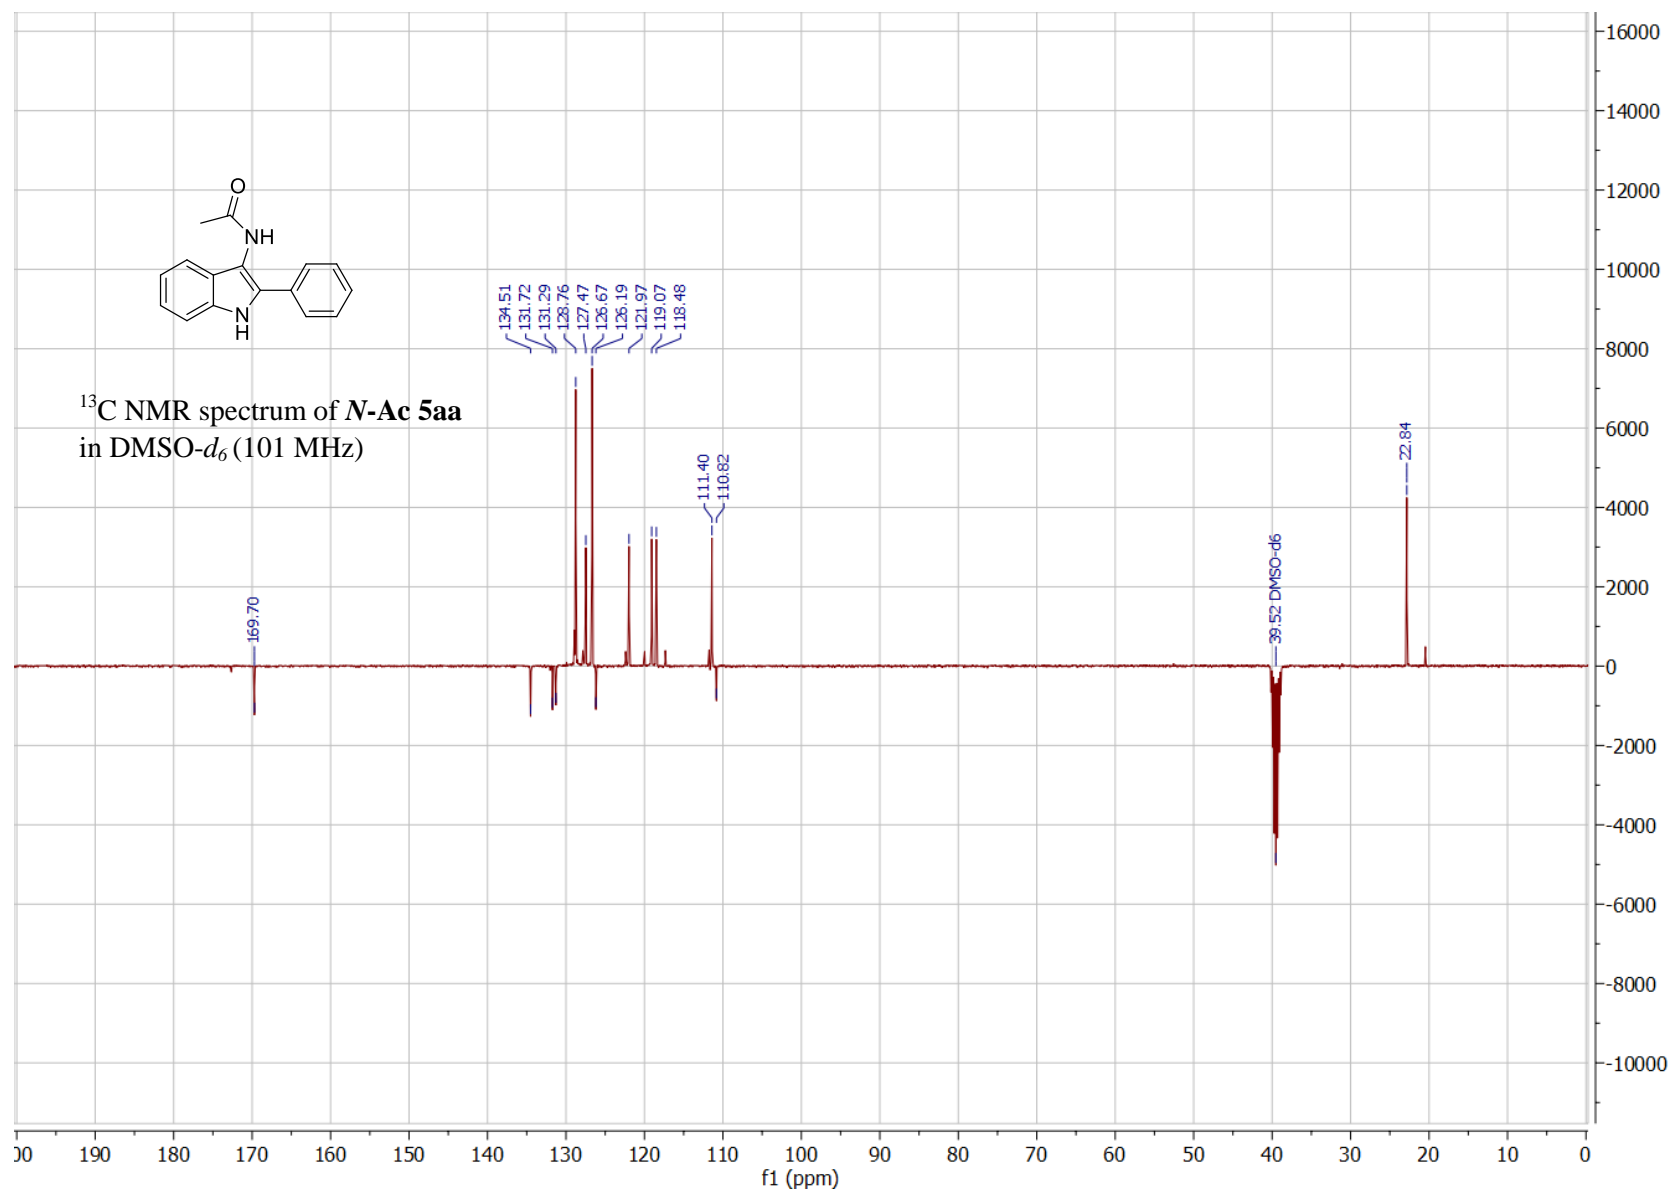

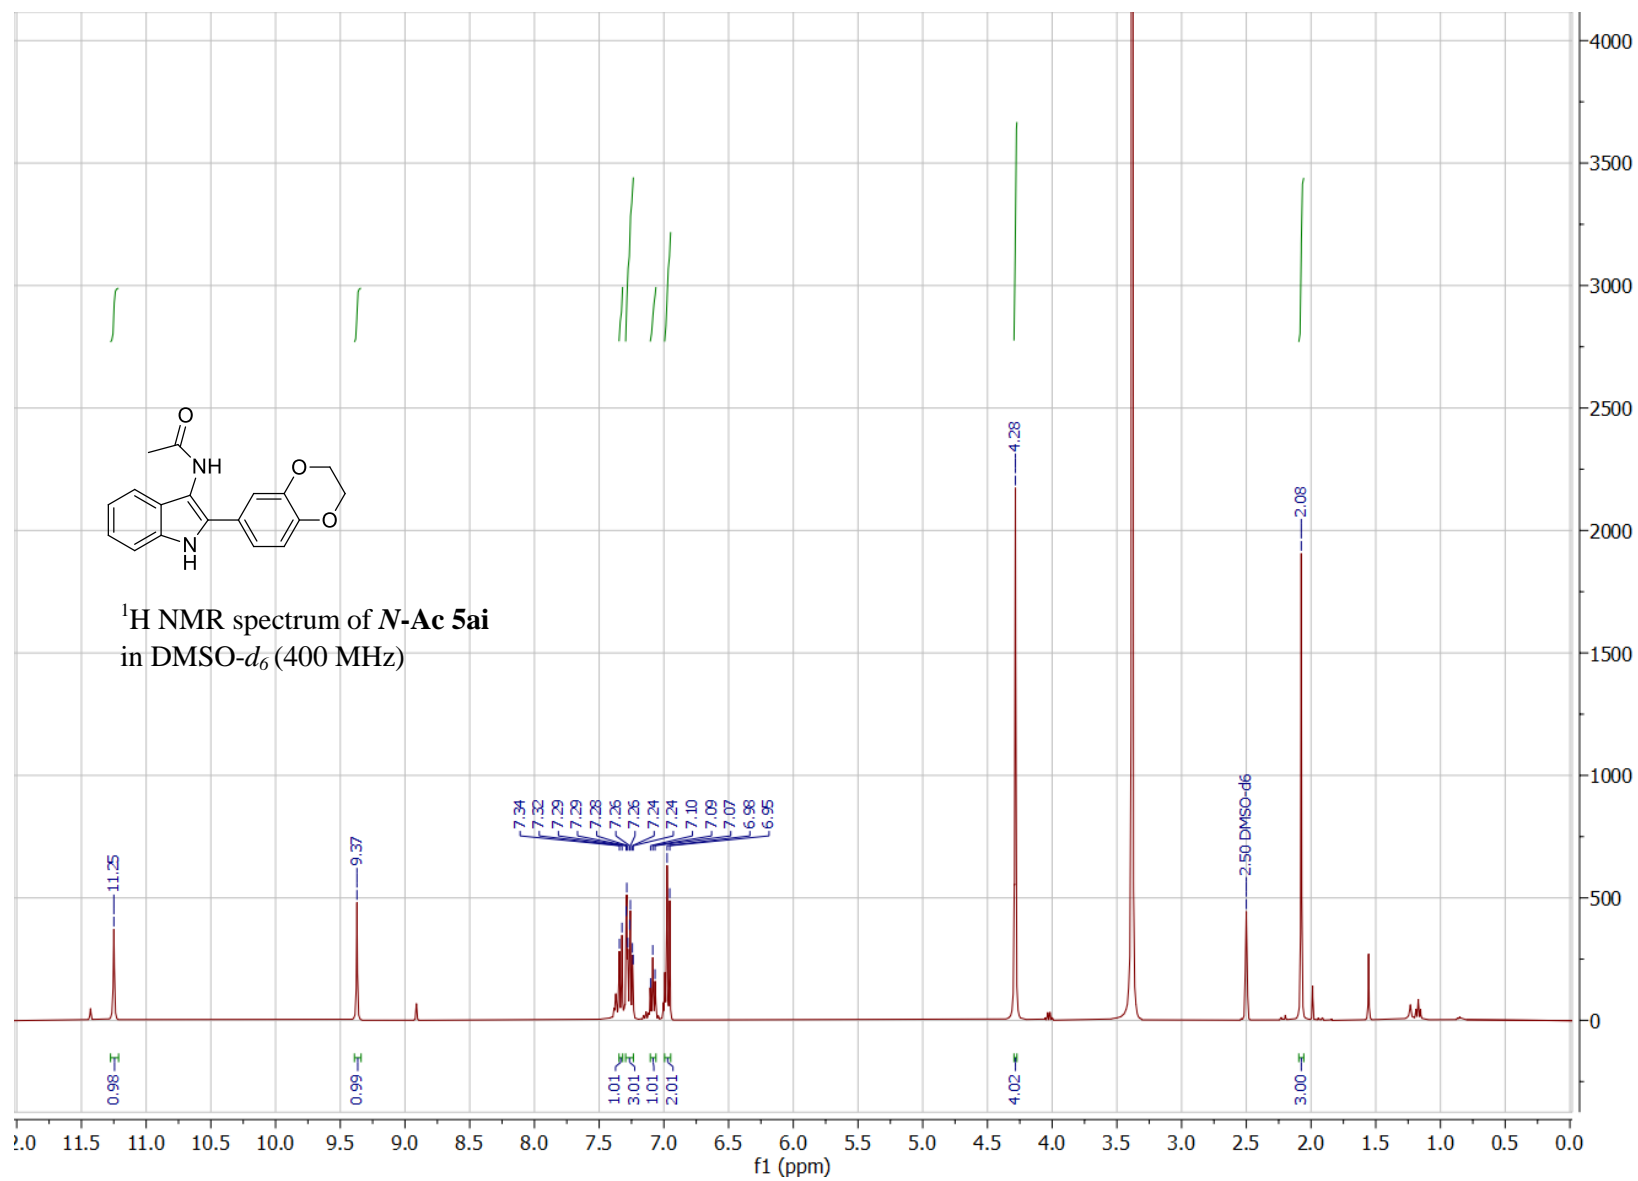



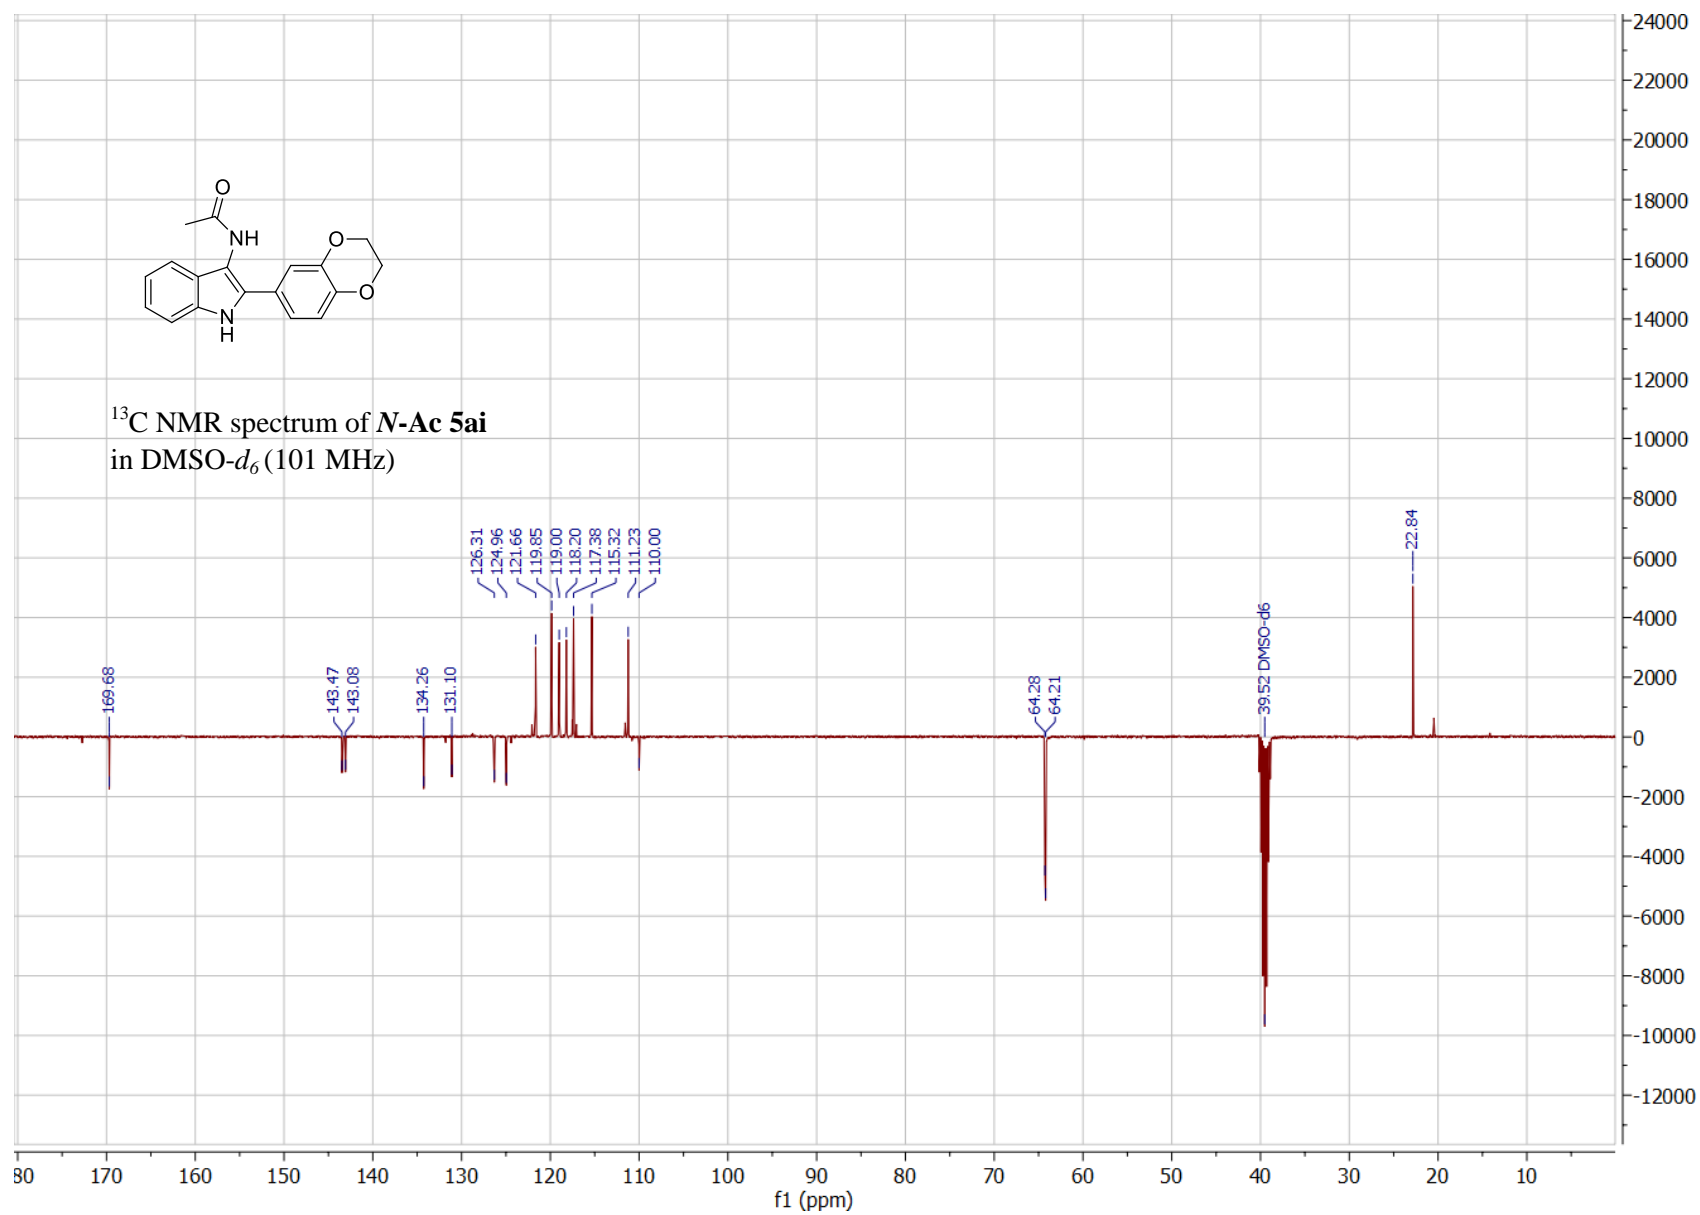

$^1\text{H}$  and  $^{13}\text{C}$  NMR spectral charts for 1-methyl-2-phenyl-1*H*-indole **J**

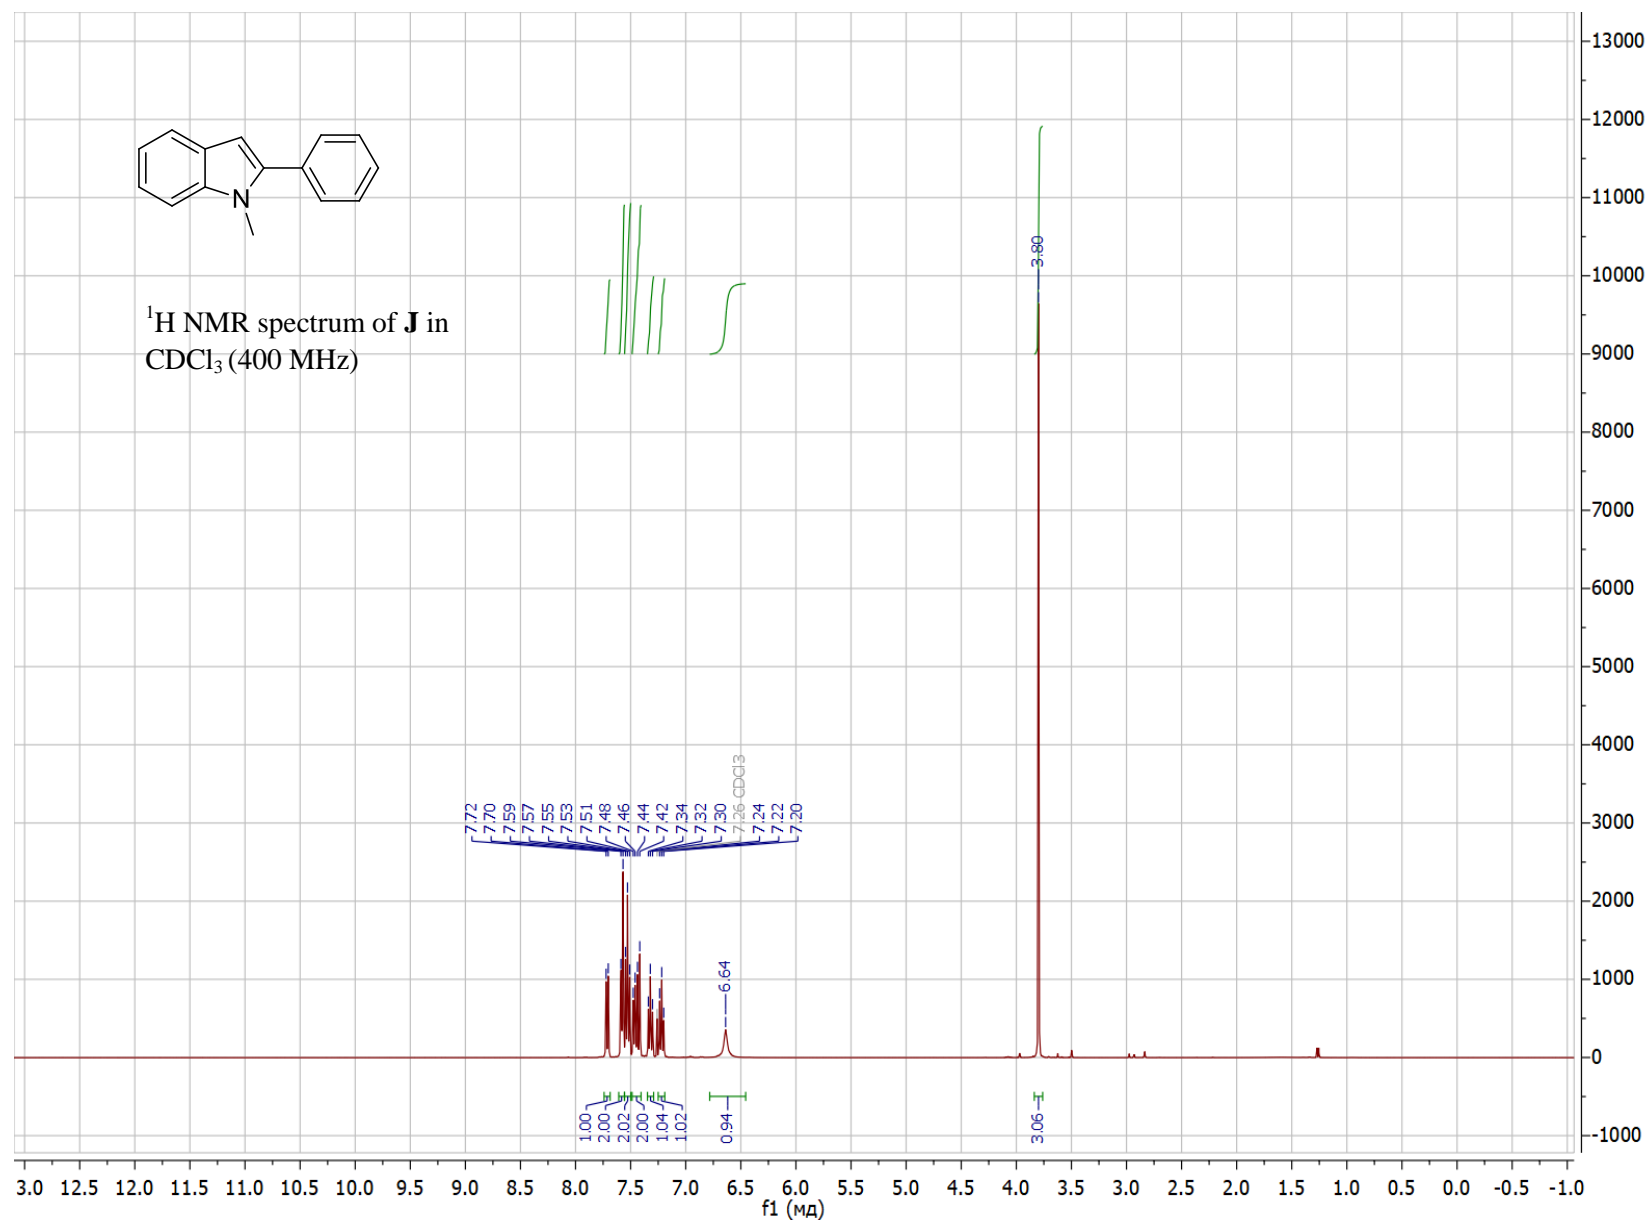

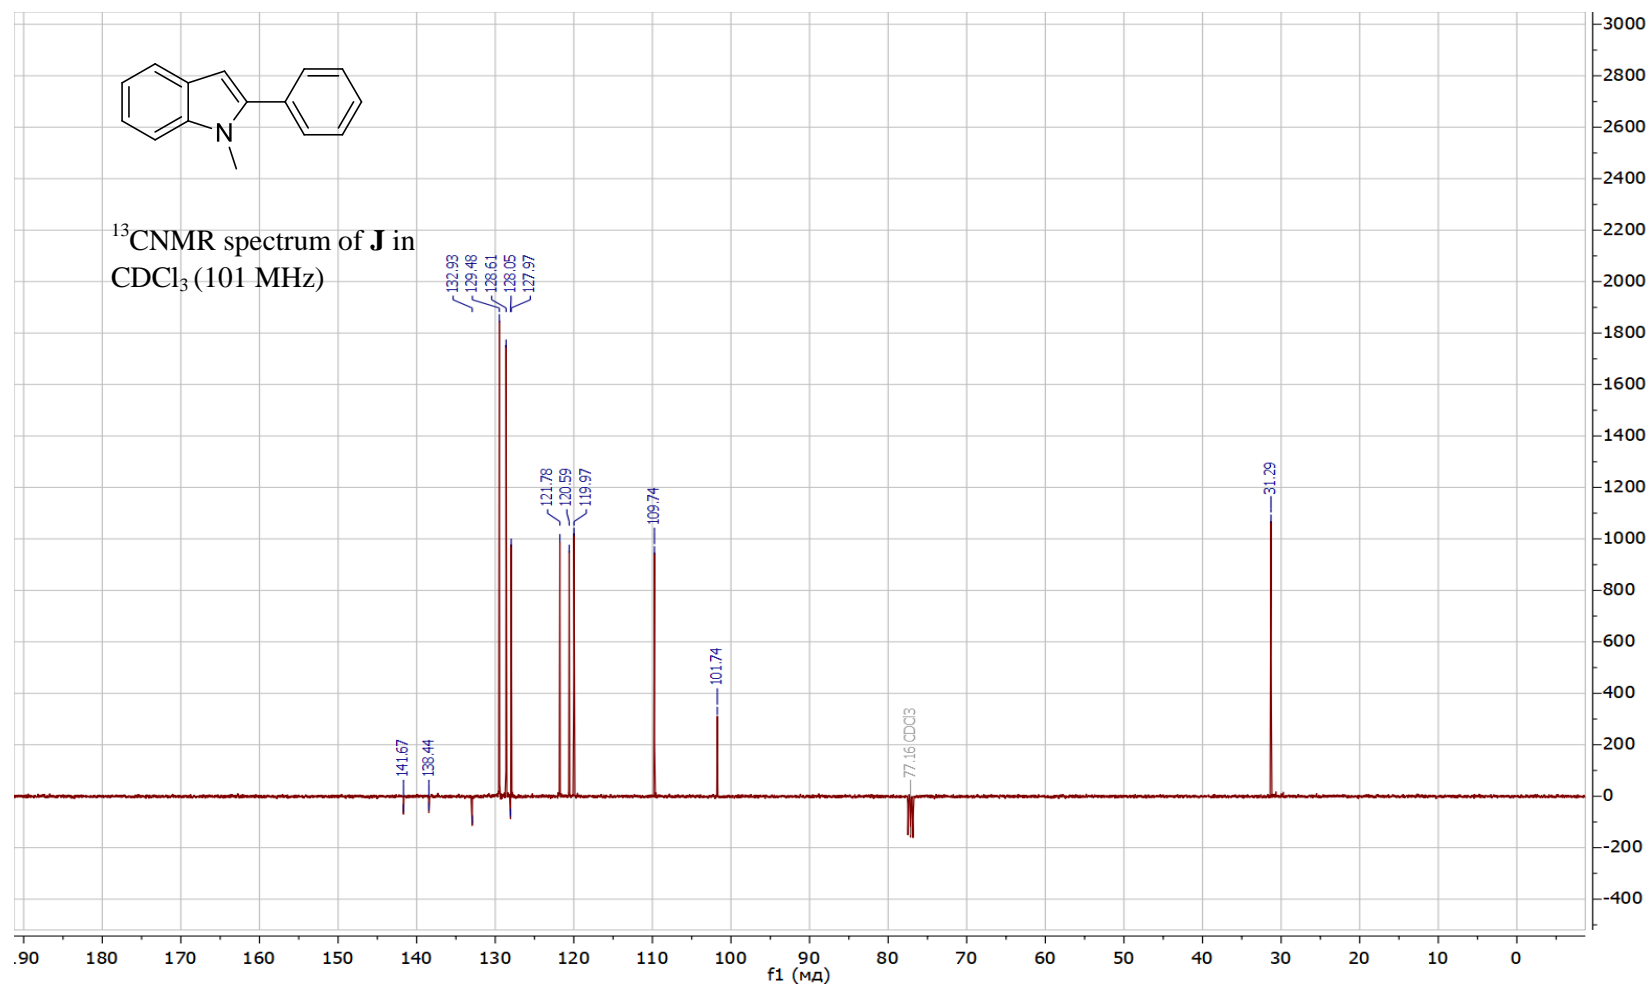

HRMS spectral chart for **4ab**, **4ad**, **5aa-ai**, **19**, *N*-Ac **5aa** and *N*-Ac **5ai**

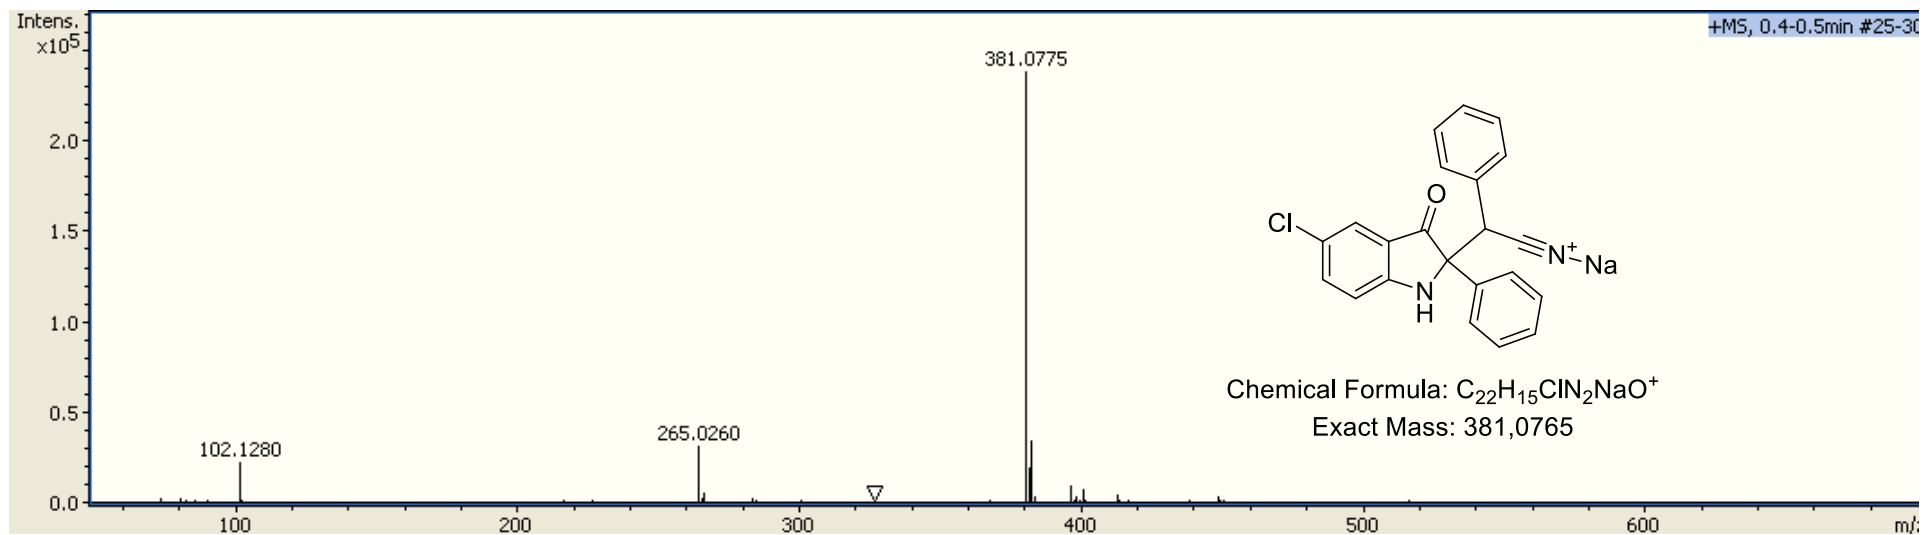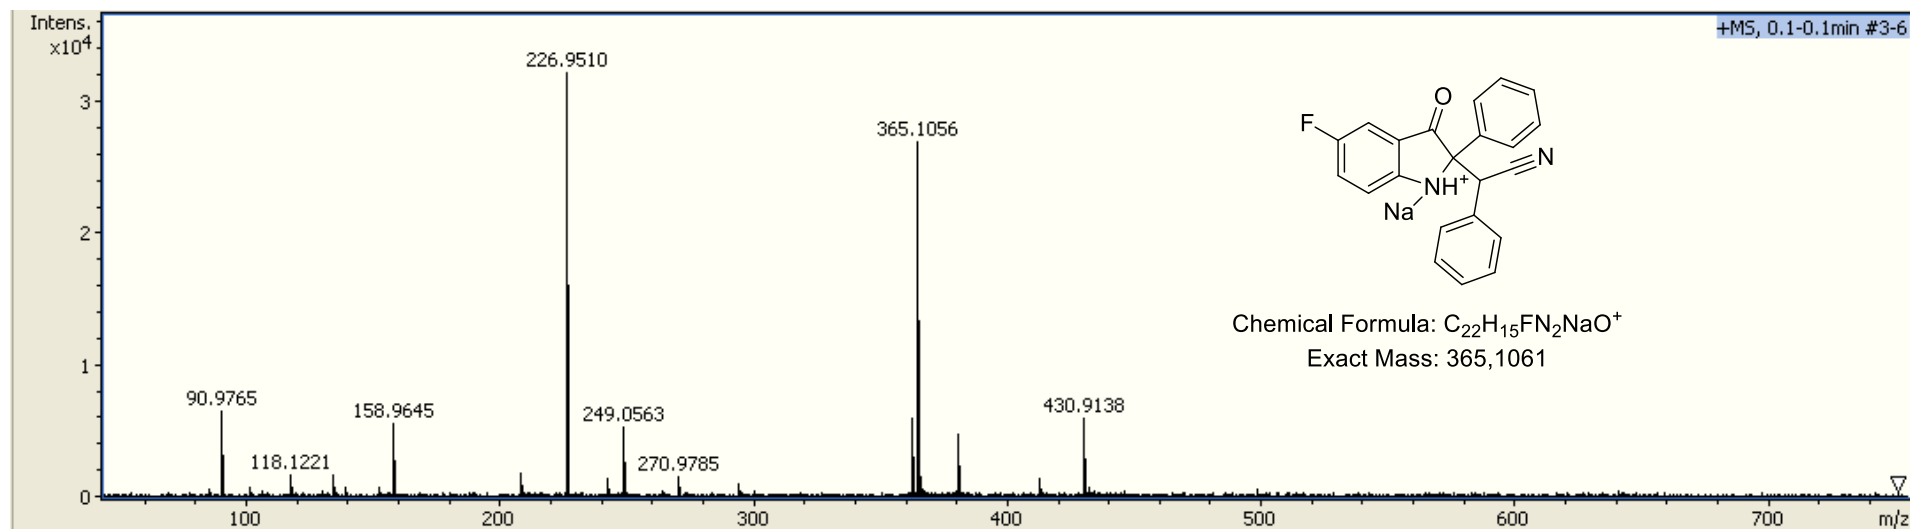

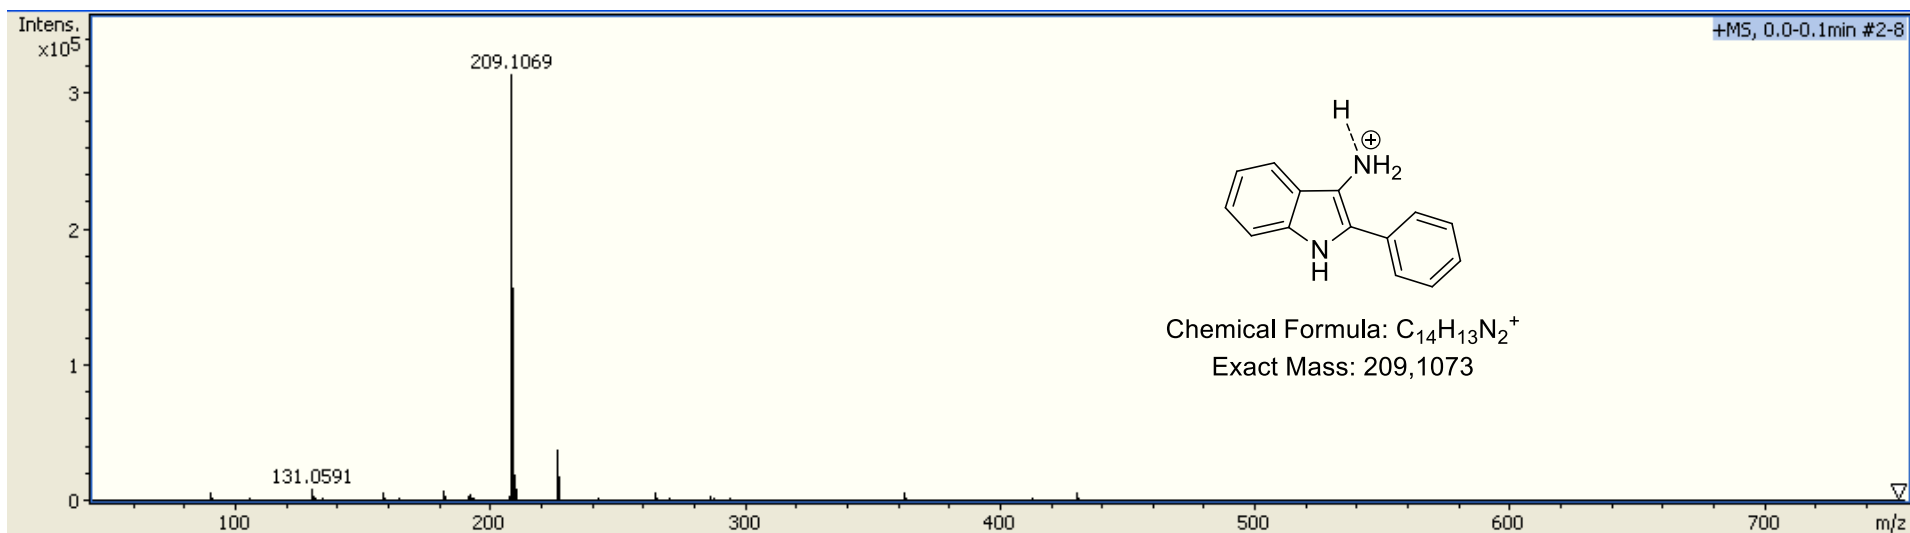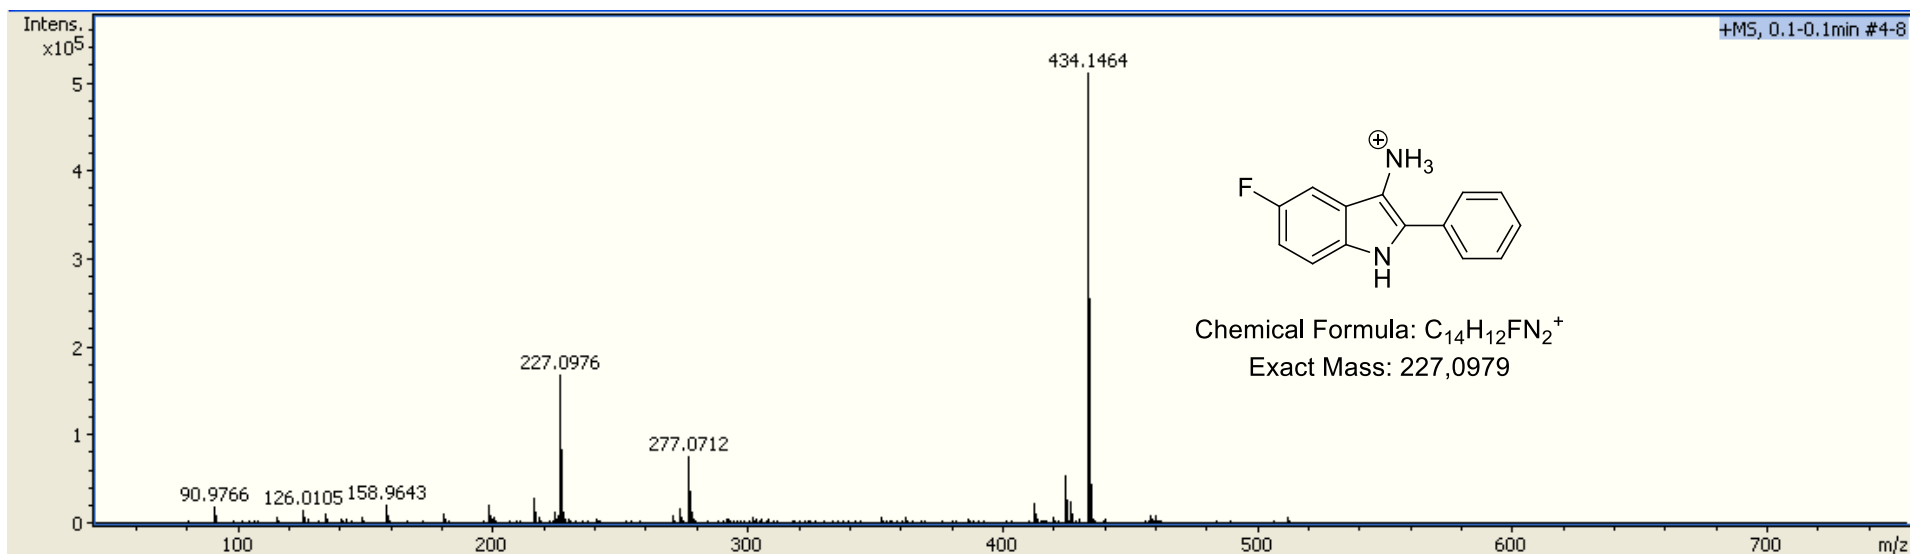

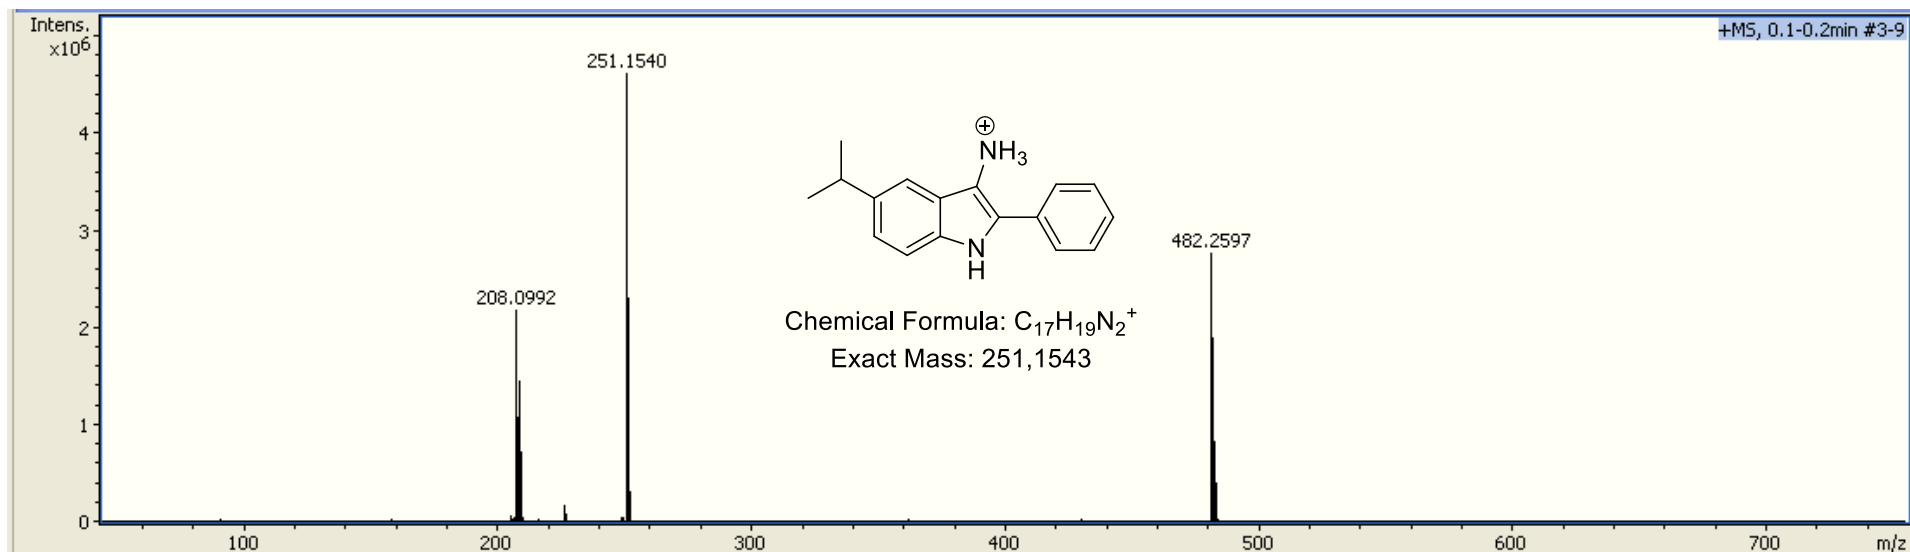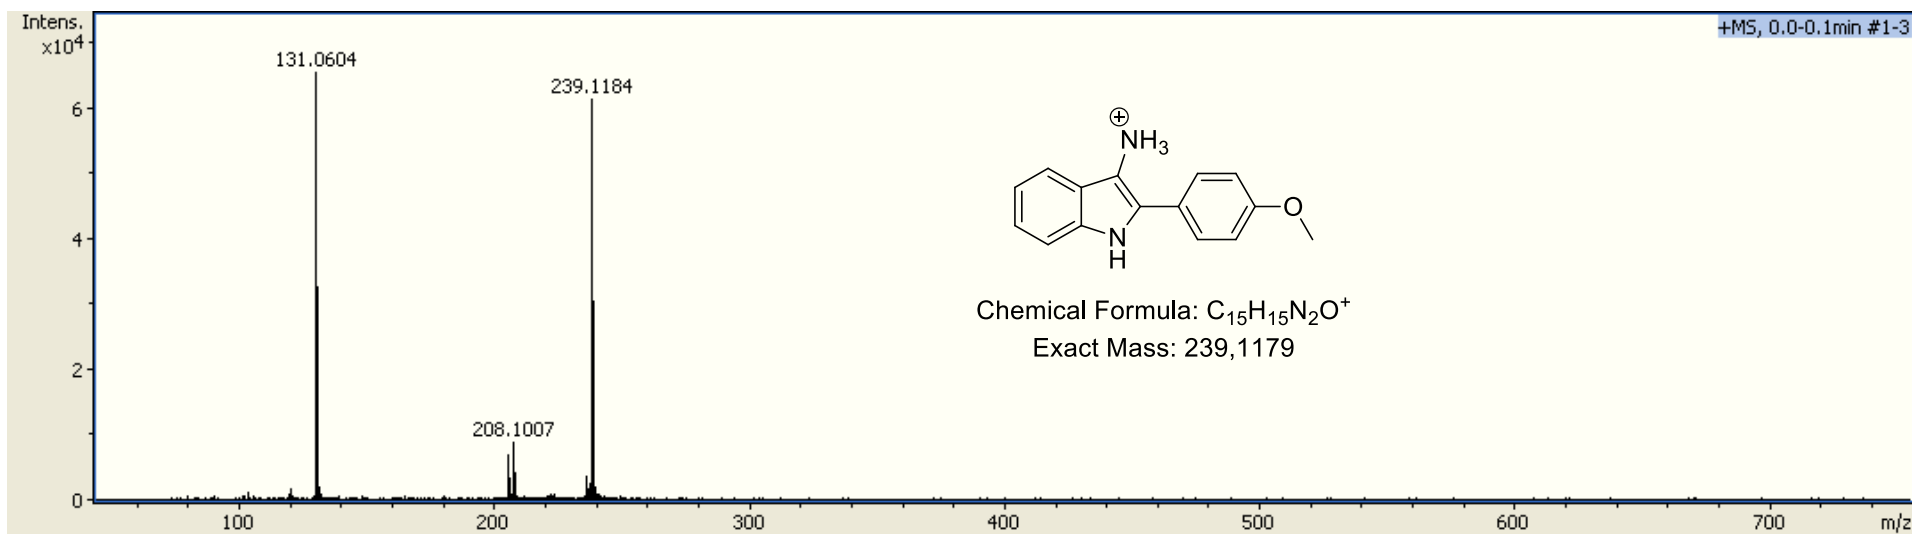

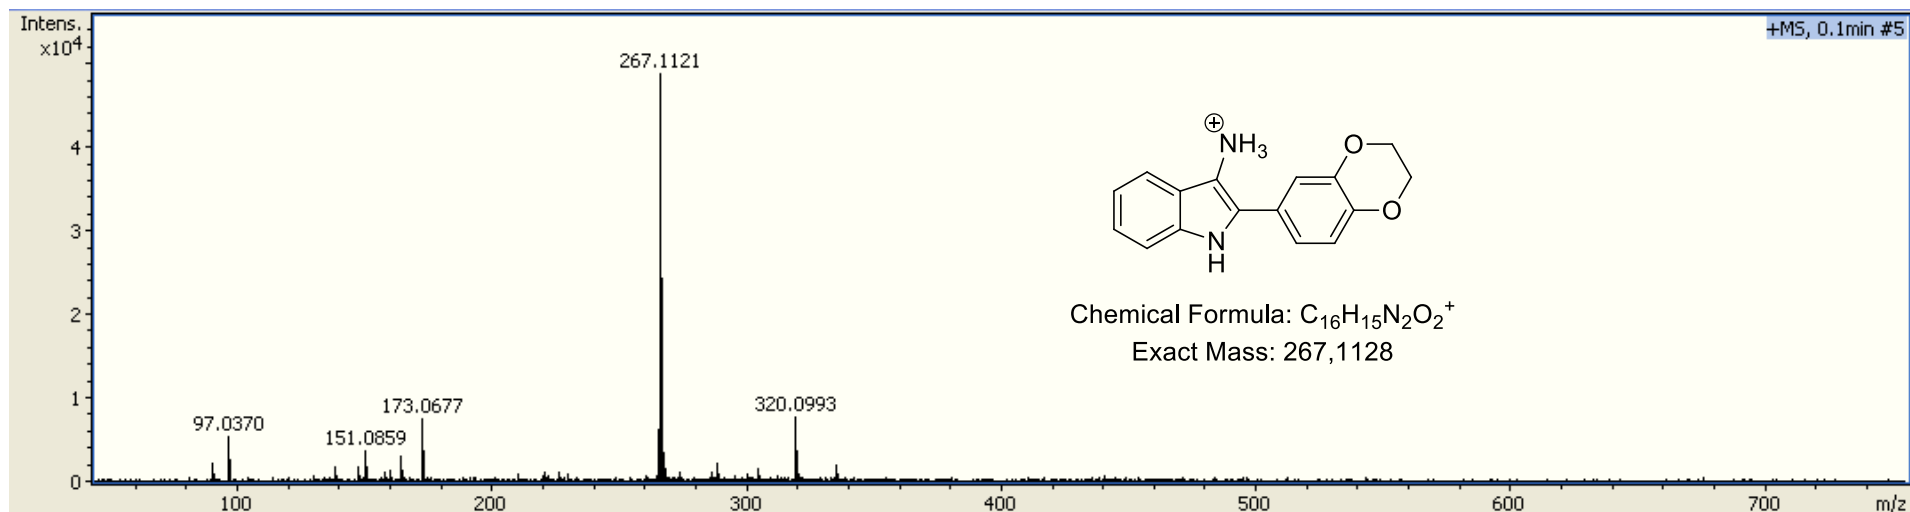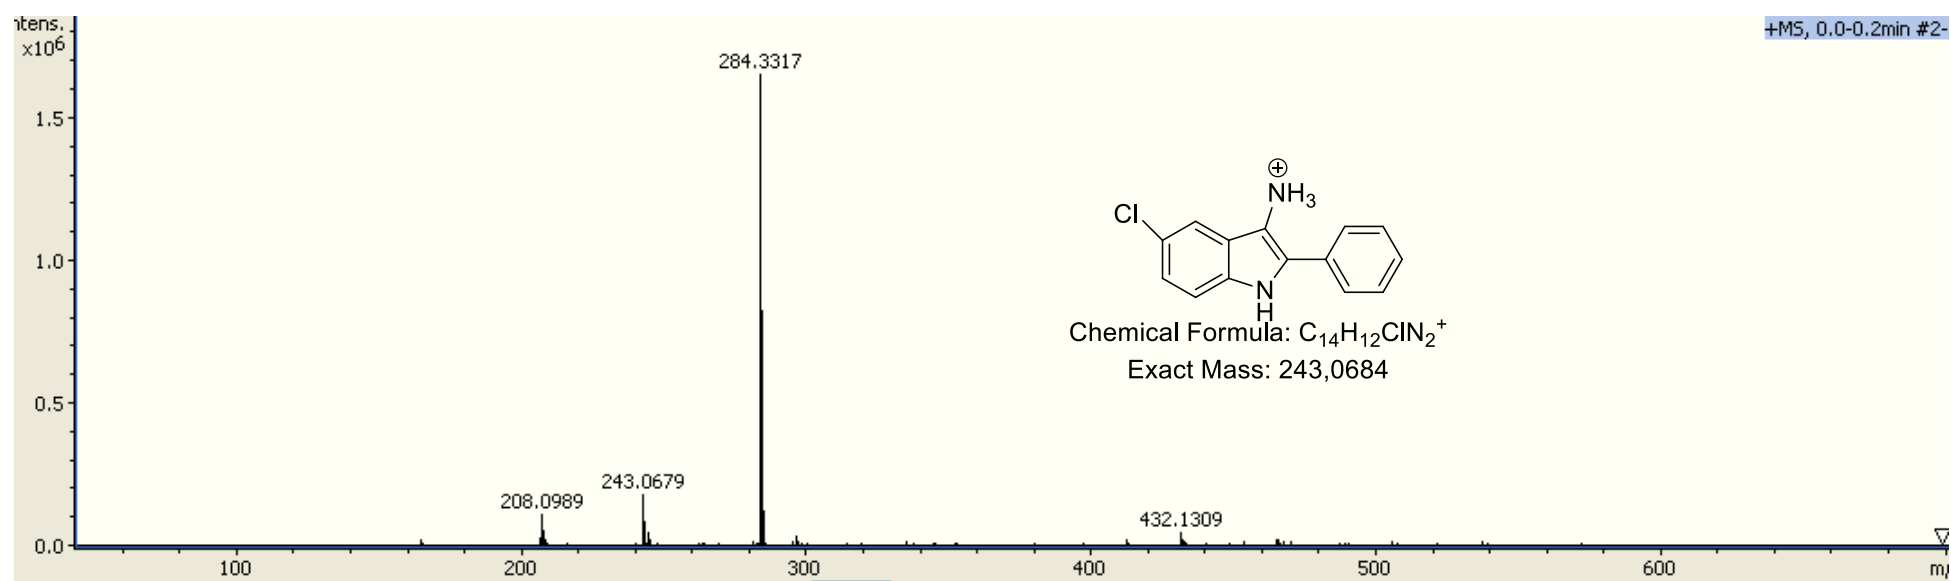

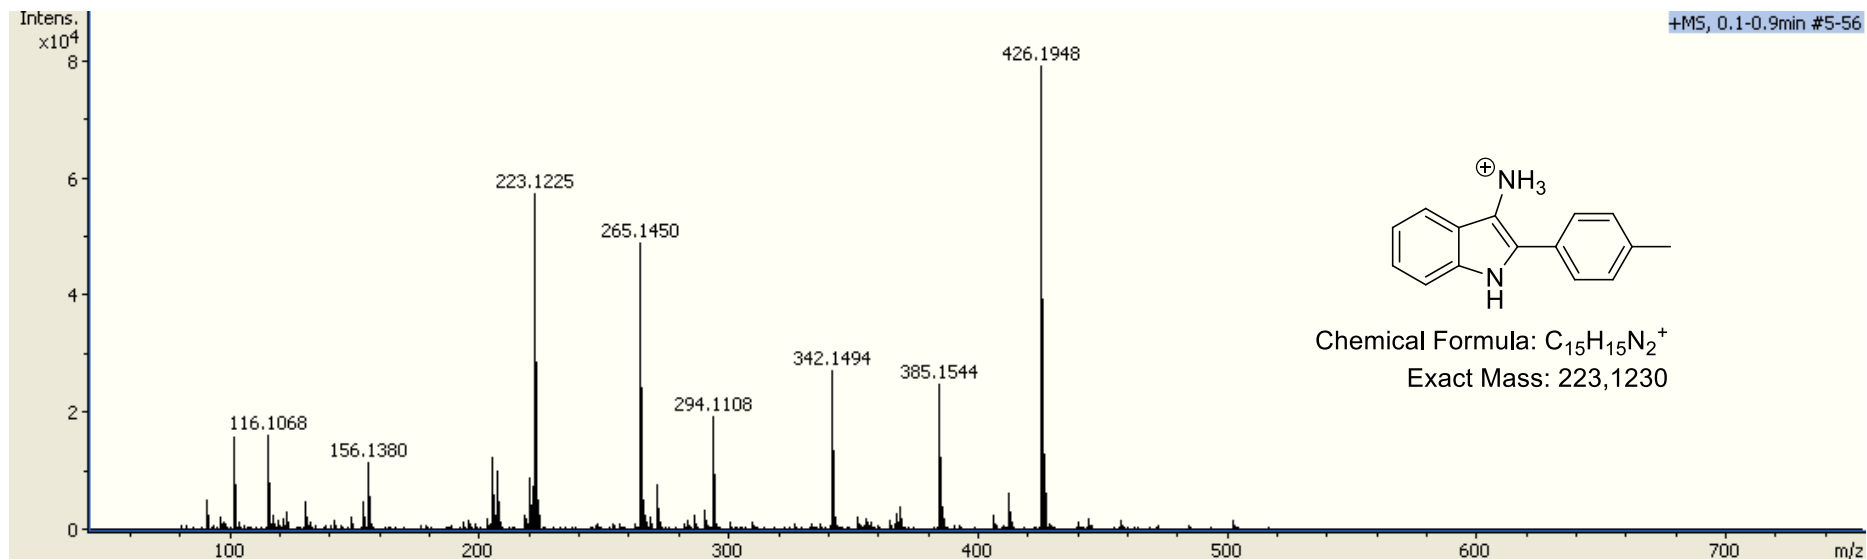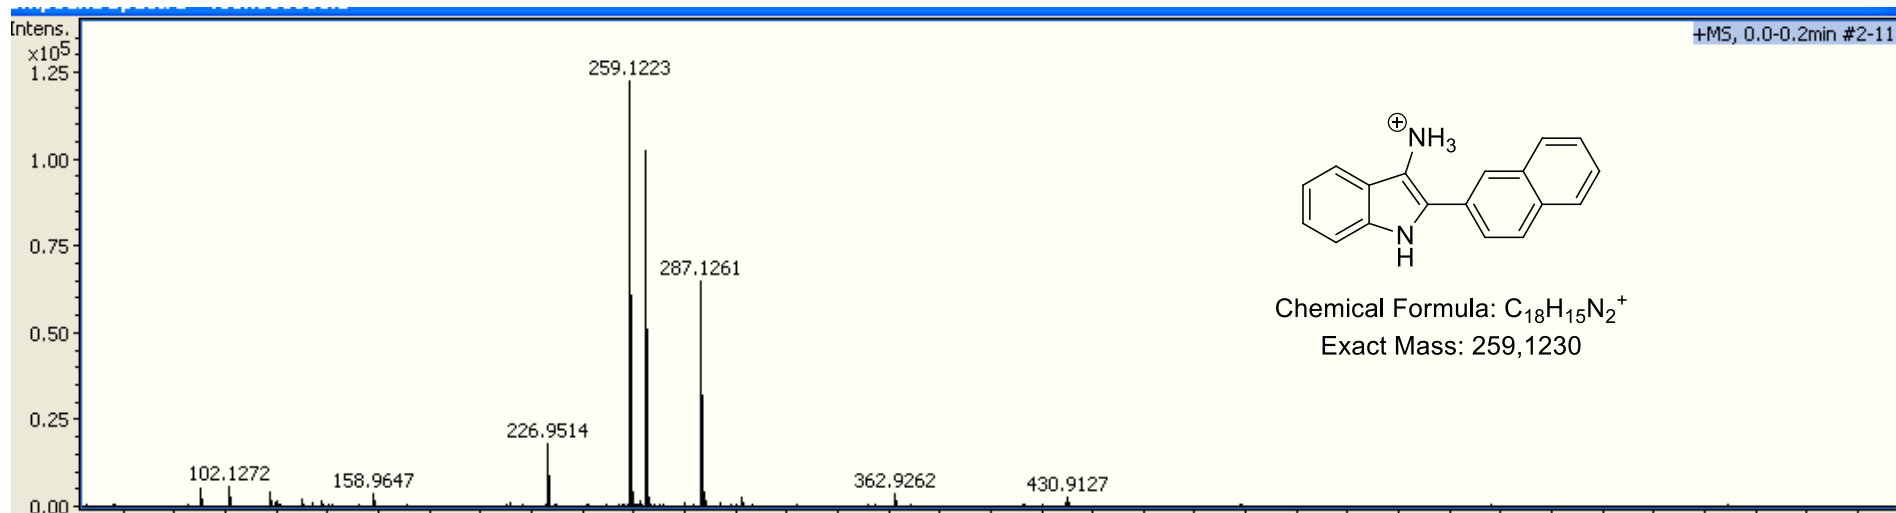



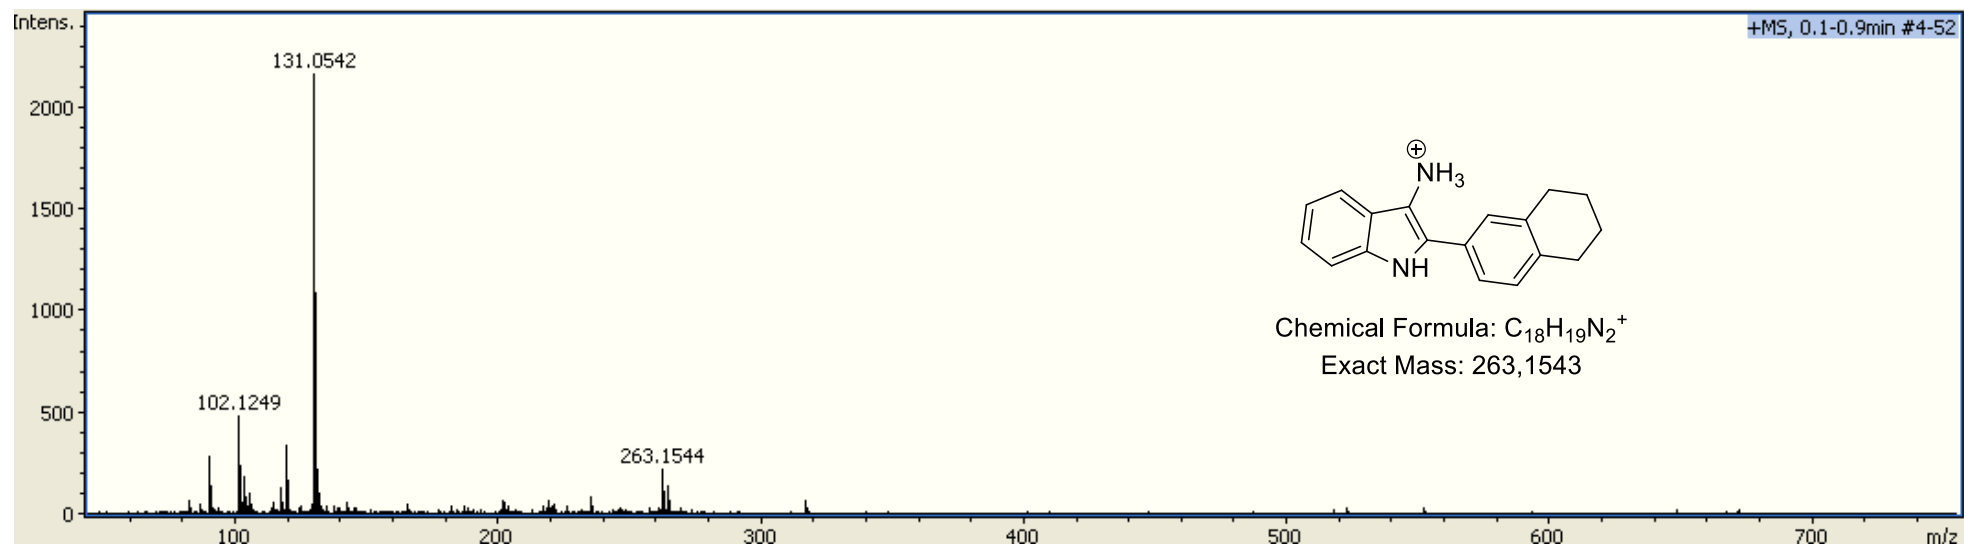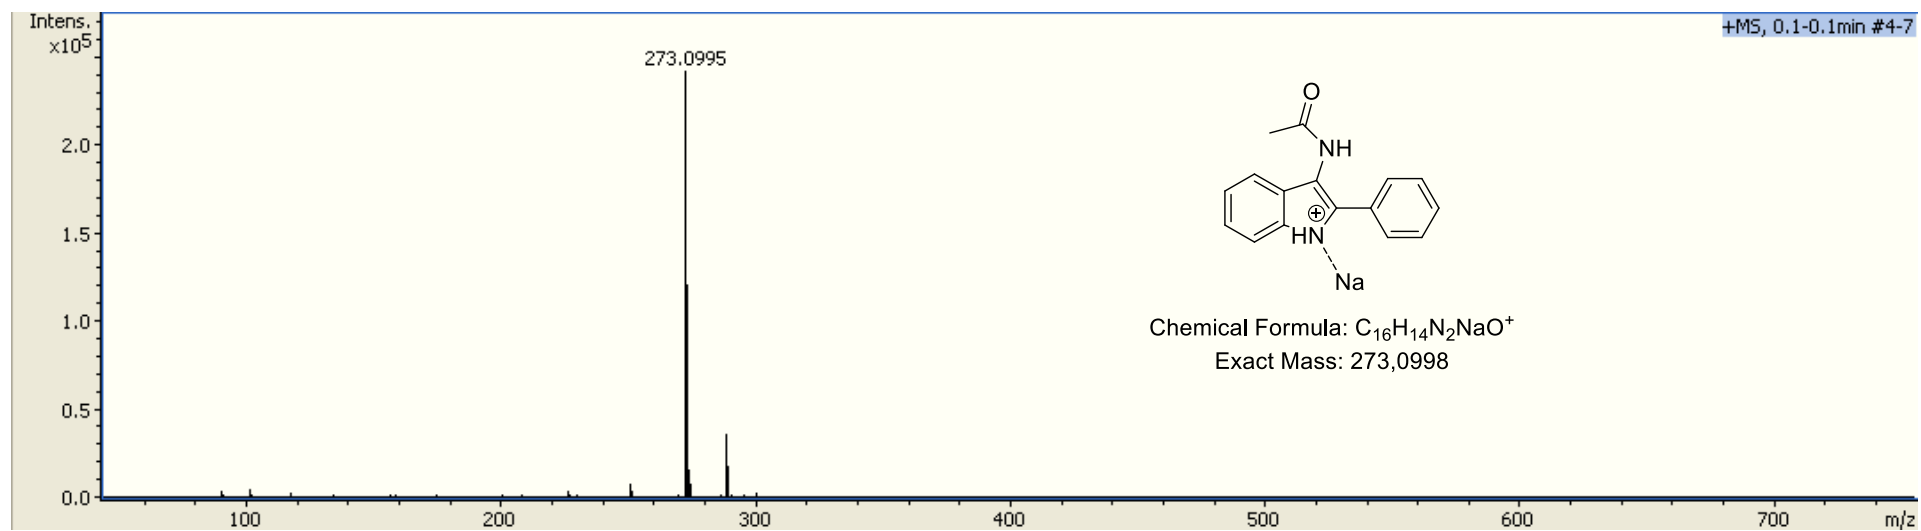

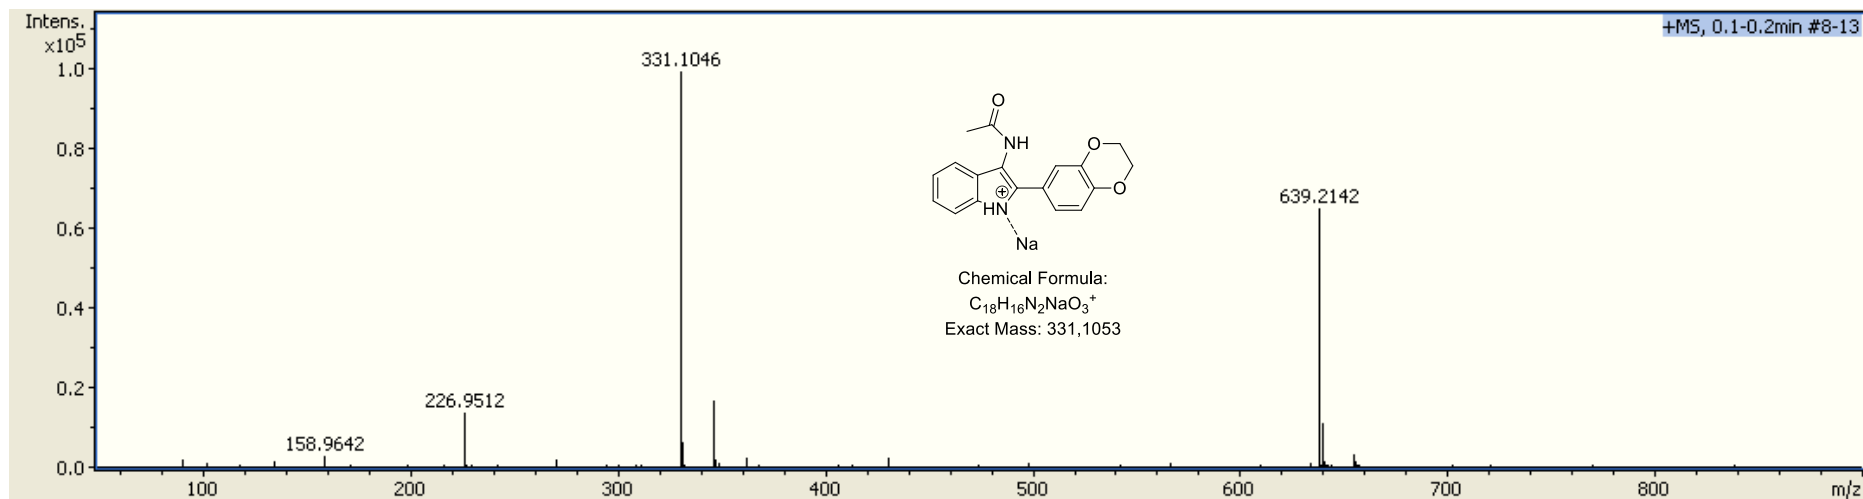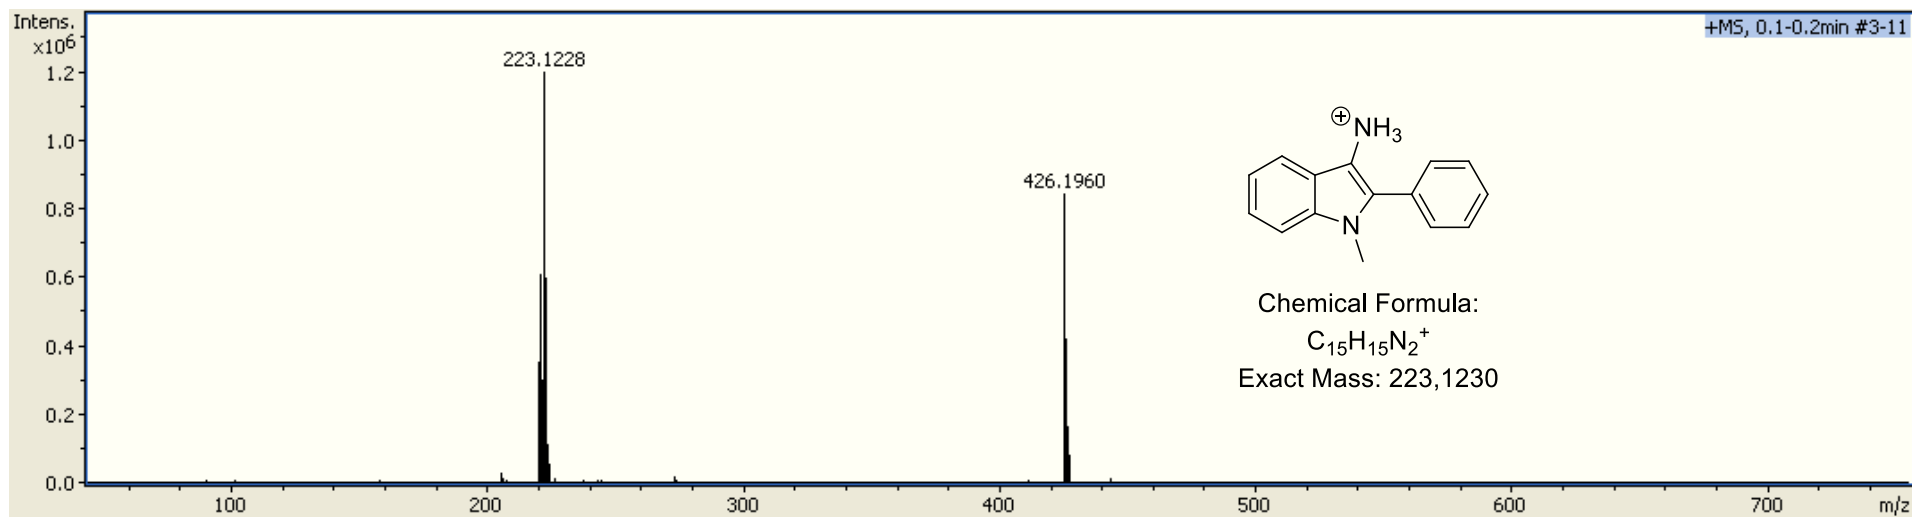

Supplement: s1 [file s1]
